# Supplementary material for: Discovery of a cis-regulatory element SaeM involved in dynamic regulation of synergid-specific MYB98
Source: Front Plant Sci. 2023 May 8;14:1177058. doi: 10.3389/fpls.2023.1177058 (PMC10200956; doi:10.3389/fpls.2023.1177058)
Supplement: Supplementary file 8 [file Table_1.xlsx]

## Sheet: Table S1
Table S1: pMYB98 cis-fragment combinations and their SC-specific activation nature
	BYRG	Exclusively at SC
	MP	Very weak, indistinguishable at SC
	B1	indistinguishable at SC
	B2	indistinguishable at SC
	B3	indistinguishable at SC
	Y1	No signal
	Y2	indistinguishable at SC
	Y3	indistinguishable at SC
	R1	indistinguishable at SC
	R2	distinguishable at SC
	R3	distinguishable at SC
	G1	Very weak, indistinguishable at SC
	G2	No signal
	G3	No signal
	BY	distinguishable at SC
	BR	indistinguishable at SC
	BG	indistinguishable at SC
	YR	Exclusively at SC
	YG	indistinguishable at SC
	RG	indistinguishable at SC
	BYR	distinguishable at SC
	BYG	indistinguishable at SC
	BRG	distinguishable at SC
	YRG	indistinguishable at SC

## Sheet: Table S2
Table S2:SaeM-like element harboring genes among Exclusively SC-specific gene pools (Source: Song et al., 2020)
All genes	SaeM-element harboring genes (promoters)	E-value (to B column)
AT1G01305	AT4G18770	7.2e-05
AT1G21870	AT1G57760	0.07
AT1G35467	AT1G45190	0.93
AT1G45190	AT1G47450	0.93
AT1G47450	AT2G04031	0.93
AT1G47470	AT2G24205	0.93
AT1G52343	AT2G31980	0.93
AT1G52970	AT3G30383	0.93
AT1G56385	AT4G00190	0.93
AT1G56400	AT4G08875	0.93
AT1G57760	AT5G18407	0.93
AT1G74020	AT5G43285	0.93
AT2G04031	AT5G43518	0.93
AT2G04037	AT5G48515	0.93
AT2G04041	AT1G52970	8.2
AT2G21655	AT1G56385	8.2
AT2G24205	AT1G56400	8.2
AT2G31980	AT1G74020	8.2
AT3G09925	AT2G04037	8.2
AT3G15370	AT2G04041	8.2
AT3G17080	AT3G17080	8.2
AT3G18220	AT3G18220	8.2
AT3G19160	AT3G19160	8.2
AT3G29797	AT3G29797	8.2
AT3G30247	AT3G30247	8.2
AT3G30383	AT3G44115	8.2
AT3G44115	AT3G56610	8.2
AT3G47440	AT4G01480	8.2
AT3G56610	AT4G03420	8.2
AT3G57840	AT4G08869	8.2
AT4G00190	AT4G20800	8.2
AT4G01480	AT4G26466	8.2
AT4G03420	AT5G18403	8.2
AT4G07515	AT5G26090	8.2
AT4G08025	AT5G34905	8.2
AT4G08869	AT5G35405	8.2
AT4G08875	AT5G36360	8.2
AT4G09545	AT5G40645	8.2
AT4G12320	AT5G42895	8.2
AT4G13261	AT5G43510	8.2
AT4G18770	AT5G43513	8.2
AT4G20800	AT5G48595	8.2
AT4G26466
AT4G28485
AT5G07572
AT5G18403
AT5G18407
AT5G24560
AT5G26090
AT5G34905
AT5G35405
AT5G35945
AT5G36360
AT5G40645
AT5G42895
AT5G42955
AT5G43285
AT5G43510
AT5G43513
AT5G43518
AT5G48515
AT5G48595
AT5G48605
AT5G60945

## Sheet: Table S3
Table S3: SaeM-like element harboring genes among Exclusively EC+CC-specific gene pools (Source: Song et al., 2020)
All genes	SaeM-element harboring genes (promoters)	E-value (to B column)
AT1G01090	AT1G07140	2.4
AT1G03860	AT1G19730	2.4
AT1G04080	AT1G27970	2.4
AT1G06290	AT1G47250	2.4
AT1G07140	AT1G80930	2.4
AT1G12000	AT3G17820	2.4
AT1G12270	AT3G23620	2.4
AT1G14060	AT3G54470	2.4
AT1G14980	AT4G01850	2.4
AT1G15750	AT4G22000	2.4
AT1G16470	AT5G11050	2.4
AT1G17130
AT1G19730
AT1G20140
AT1G22200
AT1G23410
AT1G24510
AT1G25260
AT1G26110
AT1G27400
AT1G27970
AT1G29070
AT1G29260
AT1G31910
AT1G35620
AT1G47250
AT1G48030
AT1G48410
AT1G50200
AT1G50920
AT1G53240
AT1G54630
AT1G60650
AT1G64880
AT1G67250
AT1G67340
AT1G70030
AT1G70320
AT1G71360
AT1G71860
AT1G74380
AT1G77120
AT1G79930
AT1G80040
AT1G80930
AT2G01100
AT2G01140
AT2G02990
AT2G04630
AT2G05990
AT2G13560
AT2G14880
AT2G19540
AT2G19680
AT2G20490
AT2G23930
AT2G27860
AT2G27880
AT2G28000
AT2G28080
AT2G28600
AT2G28680
AT2G33210
AT2G41780
AT2G44060
AT2G44350
AT2G45860
AT3G02760
AT3G03950
AT3G03960
AT3G04780
AT3G06580
AT3G07770
AT3G11250
AT3G11630
AT3G11830
AT3G12390
AT3G12510
AT3G15730
AT3G17820
AT3G18760
AT3G20000
AT3G20050
AT3G20630
AT3G23620
AT3G27330
AT3G27570
AT3G46560
AT3G47840
AT3G52050
AT3G53500
AT3G54470
AT3G55170
AT3G56020
AT3G57150
AT3G58610
AT3G58660
AT3G61600
AT4G00930
AT4G01850
AT4G01970
AT4G02450
AT4G09800
AT4G10040
AT4G10450
AT4G11260
AT4G13850
AT4G17510
AT4G22000
AT4G22670
AT4G25210
AT4G25240
AT4G25340
AT4G25630
AT4G26110
AT4G26190
AT4G30950
AT4G32520
AT4G33250
AT4G34290
AT4G36420
AT4G37910
AT4G38680
AT4G39300
AT5G01590
AT5G01650
AT5G03740
AT5G03940
AT5G09900
AT5G11050
AT5G11560
AT5G14610
AT5G15550
AT5G17920
AT5G19820
AT5G21150
AT5G23040
AT5G27120
AT5G27470
AT5G27750
AT5G28840
AT5G37475
AT5G38720
AT5G39570
AT5G41685
AT5G43600
AT5G47010
AT5G47680
AT5G49680
AT5G54540
AT5G55160
AT5G55280
AT5G55300
AT5G56010
AT5G56030
AT5G56500
AT5G59690
AT5G59850
AT5G59910
AT5G62440
AT5G62690
AT5G63310
AT5G65260

## Sheet: Table S4
Table S4: SaeM-like element harboring genes among Exclusively SC+EC+CC-specific gene pools (Source: Song et al., 2020)
All genes	SaeM-element harboring genes (promoters)	E-value (to B column)
AT1G01480	AT1G66260	0.15
AT1G04170	AT1G77710	0.15
AT1G07920	AT1G79390	2
AT1G08040	AT2G37270	2
AT1G08860	AT3G61110	2
AT1G10630	AT5G08080	2
AT1G10840	AT5G20920	2
AT1G10950	AT5G38480	2
AT1G11910	AT5G44340	2
AT1G13780
AT1G14450
AT1G16000
AT1G16740
AT1G18070
AT1G19110
AT1G20580
AT1G22520
AT1G26850
AT1G27310
AT1G28200
AT1G29880
AT1G43890
AT1G51510
AT1G51980
AT1G53040
AT1G54270
AT1G56450
AT1G59610
AT1G63830
AT1G65220
AT1G65720
AT1G65840
AT1G66260
AT1G73030
AT1G77610
AT1G77710
AT1G78300
AT1G79390
AT1G79940
AT2G02760
AT2G03330
AT2G03680
AT2G04520
AT2G18110
AT2G18740
AT2G19740
AT2G20930
AT2G21600
AT2G23090
AT2G24765
AT2G37270
AT2G39760
AT2G45070
AT2G46170
AT2G46505
AT3G02200
AT3G06680
AT3G08520
AT3G08530
AT3G09480
AT3G11710
AT3G12110
AT3G20770
AT3G27040
AT3G27240
AT3G43810
AT3G43980
AT3G56150
AT3G57290
AT3G58500
AT3G58700
AT3G61110
AT4G02570
AT4G02970
AT4G03550
AT4G05020
AT4G09000
AT4G11150
AT4G13520
AT4G14160
AT4G18530
AT4G20890
AT4G20980
AT4G21150
AT4G21980
AT4G23630
AT4G24570
AT4G24690
AT4G24820
AT4G28360
AT4G29480
AT4G31300
AT4G31350
AT4G31985
AT4G32390
AT4G34555
AT4G34890
AT4G38130
AT4G38630
AT5G05010
AT5G06170
AT5G08080
AT5G08160
AT5G08290
AT5G08420
AT5G08690
AT5G11770
AT5G13440
AT5G13850
AT5G16510
AT5G18420
AT5G20620
AT5G20920
AT5G22440
AT5G25540
AT5G26830
AT5G27640
AT5G36230
AT5G38480
AT5G42570
AT5G42950
AT5G44320
AT5G44340
AT5G46430
AT5G47430
AT5G52650
AT5G53650
AT5G54900
AT5G55610
AT5G56150
AT5G58060
AT5G58290
AT5G61020
AT5G61310
AT5G62930
AT5G66090
ATCG01090
ATMG00090

## Sheet: Table S5
Table S5: Putative MYB98 ortholog sequences (one per species) used in the study
Species|Gene ID	AA Identity to AtMYB98 (%)	Family	1kb pro	AA				SaeM harboring MYB98s:
Arabidopsis thaliana|AtMYB98	100	Brassicaceae	AATCATATTTTTTTGTAACCCCCATACATGAATTAATAAGGGAGGTCTTTTAAAAAGTTTTCGGACAGAACTCAGATTTAGGCAGAAAAAAGAAATACATGCATGAACTAAAGAACTAAGAAGTTGTACACTGCAAGAAACACCATTAGAGTCACACTGTTAACACTTTGTTATAAACGATGCGGTTTTTGAGTTTTTTTTTTGTTTCACTTTGGTCAGAGACTTTTTGTGAGGGTTTACTTCTAGAAGACGGAGTGAACAAAATGAAAATTAGACCTTAGAGCTAATATGGTCAATACACTCATTGTCCTTCGGCATTTAAAATGGTAATTACATTTTTGTTGACTAAATTAATACTACACTTTATGATAAATTAACTAAAGACAACTAAATATACAA…	MENFVDENGFASLNQNIFTRDQEHMKEEDFPFEVVDQSKPTSFLQDFHHLDHDHQFDHHHHHGSSSSHPLLSVQTTSSCINNAPFEHCSYQENMVDFYETKPNLMNHHHFQAVENSYFTRNHHHHQEINLVDEHDDPMDLEQNNMMMMRMIPFDYPPTETFKPMNFVMPDEISCVSADNDCYRATSFNKTKPFLTRKLSSSSSSSSWKETKKSTLVKGQWTAEEDRVLIQLVEKYGLRKWSHIAQVLPGRIGKQCRERWHNHLRPDIKKETWSEEEDRVLIEFHKEIGNKWAEIAKRLPGRTENSIKNHWNATKRRQFSKRKCRSKYPRPSLLQDYIKSLNMGALMASSVPARGRRRESNNKKKDVVVAVEEKKKEEEVYGQDRIVPECVFTDDFGFNE…				Species|Gene ID	E-value	Family
Caulanthus amplexicaulis|Caamp.0190s1050	88.3	Brassicaceae	AAGATAACTACACATAACTTGCGCCTGAAGCAACCACGTGATCTAGGTTTCTGGGCCCATGAGACCCATGTTTTAGGTTTTAATCCCATCAATTAAGTTATATGAAACTAAATGATCAATACAAGCTCTTCTATAAGATACTTCTAGTCACTAGACCACCAGTTAATAAAAAAGAAAAAAGAAATTACCTCTAGCATAGAAAATACTACTCTTTTCTACGTCAAACGAAGATATTTCTCTTCTTGAATCCATTAATTAGCTAATTGGTCAAAACACACTCCTTCGCACTAAAATGGTTATTACATTATTTTTTTGTTTACTCAATTAATACCTTTTTGTGAGAAATTAACTAAACACAACTAAATAAATTTACAATAAATGAATTATTAACAAATTAAA…	MENYVHESGFAPLNQTIFTRDQEQMKEEDFPFEVVDQSKPTSFLQDFHHLDHDHQFDHHHHHHHGSTSSNPLLGIQTTSSCINNAPFEHCSYQENMVDFYESKPQLMHHHFQAAENPYFTRNHHQEINLVDDHDHMNLEQNNMMMMRMIPFDYPPTEIIKPMNFVMPDEVSCVSADNDCYRAMTFNKTKPFLTRKLSSSSSSSSWKGKKKTTLVKGQWTTEEDRILIQLVEKYGLRKWSHIAQVLPGRIGKQCRERWHNHLRPDIKKETWSEQEDRVLIEFHKEIGNKWAEIAKRLPGRTENSIKNHWNATKRRQFSKRKCRSKFPRPSLLQDYIKSLDLGVLSSSSVPARGRRRESNKKKDVVAVDEKKKKEEEIYGQDRVVPECVFTDDFGFNEKLL…				Arabidopsis thaliana|AT4G18770	0.00013	Brassicaceae
Myagrum perfoliatum|Myper.0006s1196	89.1	Brassicaceae	CCATGCTTTTAATGTGTAAATTCTCAGATCGAGTTTACGTCCAATGTCCATACATTTTCCGGCCGGTTCAGGCATTTGTTTTCGGTTCTGGTTCAGGCAGAAGATAACAATACGTAACTTGCGCCCGAAGCAACCATGTGGTCTAGGCTTCTTGCCCCATATGAGACCCATGTTTCAGGTTTTAATCCTATCAGTTAAGTTATAGTATCAAGCGAAATGATTAATACAAACTATTCTTTTTACGTCAAACGAAGATATTTCTCTTATTGAATCCATTAATTAGCTAAATGGTCAAAATACTCCTTAGCATTTAAATGGTTCCTACATTTTTTTTTTGTTGACTCAATTAATACCTTTTTGTTAGAAATTAACTAAACACAACTAAATAAATTTACAATA…	MENYVDENGFAPLNQTIFTRDQEQMKEEDFPFEVVDQSKPTSFLQDFHHLDHDHQFDHHQQHHQHGSTSSHPLLRIQTTSSCINNAPFEHCSYQENMVDFYESKPNLMNHHFQAAENPYFTRNHHQEINLVDGHGPTDLEQNNMMTMRMIPFDYPPTEIIKPMNFVMPDEVSCVSANDDCYRAMSFNKTKPFLTRKLSSSSSSSSWKGKKKTTLVKGQWTAEEDRILIQLVEKYGLRKWSHIAQVLPGRIGKQCRERWHNHLRPDIKKETWSEEEDRVLIEFHKEIGNKWAEIAKRLPGRTENSIKNHWNATKRRQFSKRKCRSKYPRPSLLQDYIKSLDLGVLSSSSVPARGRRRESNKKKELVAVEEKKKKEEEIYGQDRIVPECVFTDDFGFNEKL…				Arabidopsis lyrata|AL7G35480	0.0058	Brassicaceae
Eruca vesicaria|Eruve.0001s0102	86.6	Brassicaceae	GCTTTGATATAAGGTATGCTTTTAATTATATGTTCTTTGAACCGCAGACATTTATGTTCCTGCGGTTCTGGTGCAGACAGAAGATAACAATTTATAACTTGTGCTAGAAGTAACCATGTGGTCTAGGTTTCTGGGCCATTCATGAGACCCATGTTTTAGGTTTCAACCCCATCAATTAAGTTATCGAATGATTCTATTCTGTAAAACAAAATAAAAATGCAAAATCTAGCATAGTTGCATAGAAGATGCACTTCTATTCTTACGTTAAACGAAGATATTTATTTTCTTGAATCCATTCATTAGCTAAATGGTCAAACAGTCTTTATCATTAAAATGGTTATTTCAATATTTTGTTGACTCAATTTATATTTTTTTGTGGGAAGATTACTAAACACAACT…	MENYVDESNFAPLNQTIFTRDQEHMKEEDFPFEVIDQSKPTSFLQDFHHLDHDNQFDHHHHHPYHHHGSTSSNPLLGMQTTSSCVDNNAPYQHCSYQENMVDFYETKPQLINHHFQAAENPYFTRNHHHHQEINLVNDHDPMNLEQNNMMMMRMIPFDYPPTETNKPMNFLMPDEVSCVSADNNSYRSMSFNKTKPFLTRKLSSSSSSSSWKEKKKTTVVKGQWTAEEDSVLIQLVEKYGLRKWSHIAQVLPGRIGKQCRERWHNHLRPDIKKETWSEEEDRVLIEFHKEIGNKWAEIAKRLPGRTENSIKNHWNATKRRQFSKRKCRSKYPRPSLLQDYIKSLDMGVLASTSVPARGRRKESNKKKEVVAVEEKKKEKEKEKEEEFYGQDRIVPECVF…				Myagrum perfoliatum|Myper.0006s1196	0.0058	Brassicaceae
Sinapis alba|Sialb.0078s0236	85.5	Brassicaceae	ATGTCCATGTATTTTCCTGCCGGTTCAGGCATTTGTTTCCCGTTCTGGTGCGTACAGAAGATAACAATCGATAACTTGCGCCCAAAGCAACCATGTGGTCTTGGTTTCTGGGGCCCATGCATGAGACCCATGTTTTAGGTTTTAATCCCATCAGTTAAGTTATCAAATGATTCTCTTCTCTAGAACAAAGTACAAATGCAAAATCTAGCATAGAAGATGCTAATCACTTTTTACGTCAAACGAAGATATTTCTATTCTTGAATCCATTAATTAGCTAAATGGTCAAATTAAACACTTCTTAGCATTAAAATGGTTATTACAATTTTTTGTTGACTCAATTAAATTTATTTTTGGGTGAGAAAATAACTAAACAGAACTAAATAAGTTTACAATAAATGA…	MENYIDESGFAPLNQTIFTRDQEHMKEEDFPFEVVDQSKPTNFLQDFHHLDHDNQFDHQYHGSTSSNPLFGIQTTSSCANNAPYQHCSYQENIVDFYETKPQLMNHHFQAAENPYFTRNHHQETINLVDDHDHVNLEQNNMMMMRMIPFDYPPTETNNKPMNFVMPDEVSCVSADNNSYRAMSFNKTRPFLTRKLSSSSSSSSSWKGKKKTTLVKGQWTAEEDRILIQFVEKYGLRRWSHIAQALPGRIGKQCRERWHNHLRPDIKKETWSEEEDRVLIEFHKEIGNKWAEIAKRLPGRTENSIKNHWNATKRRQFSKRKCRSKYPRPSLLQDYIKSLDVGVLSSSSVPARGRRKQSNKKKDVVAVEEKKKEKEKEEEFYGQDRIVPECVFTDDFGFNE…				Crambe hispanica|Crahi.0633s0018	0.12	Brassicaceae
Crambe hispanica|Crahi.0633s0018	85.3	Brassicaceae	TACGTCCAGTGTCCATTTATGTTCCTGCCGGTTCAGGCATTTGTTTTCCGTCCTGGTGCAGGCAGAAGATAACAATCGATAACTTGCGCCCAAAGCAACCATGTGGTCTAGGTTTCTGGGCCCATGCATGAGACCCATGTTTTAGGTTTTAATCCCATCAATTAAGTTATCAAATGATTCTCTTCTATAGAACAAAATACAAATGGAAAATCCAATTCATTTTTGATTTTTTACGTCAAACGAAGATATTTCTATTCTTGAATCCATTAATTAGCTAACTGGTCAAAACACTTCTTAGCATTAAAATGGTTTATTACATTTTTGCTGACTCAATTAATTCCTTTTGCGAGAAAATAACTAAAGACAACTAAATGAATTTACAATAAATGAATTATTAAC…	MENYIDECGFAPLDQTFFTRDQEHMKEEDFPFEVIDQSKPTSFLQDFHHLDNDNQFDHHHHHHHYHHGSTSSNPLFGIQTTSSCANNAPFQHCSYQENMGDFYETKPQLMNHHFQAADNPYFTRNHHQEINLVDDYDNMNLEQNNMMMMRMIPFDYPPTETNKPMNFVMPDEVSCVSADNNSYRAMSFNKTKPFLSRKLSSSSSSSSWKGKKKTTLVKGQWTAEEDRILIQLVEKYGLRKWSHIAQVLPGRIGKQCRERWHNHLRPDIKKETWSEEEDKVLIEFHKEIGNKWAEIAKRLTGRTENSIKNHWNATKRRQFSKRKCRSKYPRPSLLQDYIKSLDVGVLLSSSVPARGRRKESKKKKDVVAVEEKKKEKEEEFYGQDRIVPECVFNTEDFGF…				Diptychocarpus strictus|Distr.0008s100500	0.12	Brassicaceae
Boechera stricta|Bostr.30275s0352	90.9	Brassicaceae	GCATTTGTTATCGGTTCTCTCGTGCGAGACAGAAGATAACACTACATAACTTACGCCTCAAGCAACCGCGTGGGCTAGGTTTATGGGCTCATGAAACTCATGTATTACGTTTTTATCCCATCAATTAAGTTACACTATAAACTAAATGATTAATACAAACTCTTATAAGAAATTACGAATCCAAAATCTGTACAGTATACTATAAAAGACTATTCCTTTTTACGTGAAACAGCAGATATTTATTCTTTTTGAATCCATTAATTAGACCTTAGAGCTAAATGGTCAATACACTCCTTGTCCTTGGCCTTTAAAATGGTAATTACATTTTTGTTGACTAAGTTAATACACTTTATGAAAAATTAACTAAACAAAATTAAATATTCACAATAAATGAGTTGT…	MENFVDESGFIPLNQSIFTRDQEHMKEEDFPFEVVDQSKPTSFLQDFHHLDHDHQFDHHHHHHGSSSSNHLLGLQMTSSCINNAPFEHCSYQENMVEFYESKPHLMNHHFQAAENPYFTRNHHQEINLVDEHDHMDLEQNNMMMMRMIPFDYPPTEIIKPMNFVTPDEISCVSADNDCYRATSFNKTKPFLTRKLSSSSSSSSWKEKKTSTLVKGQWTAEEDRILIQLVEKYGLRKWSHIAQVLPGRIGKQCRERWHNHLRPDIKKETWSEEEDRVLIEFHKEIGNKWAEIAKRLPGRTENSIKNHWNATKRRQFSKRKCRSKYPRPSLLQDYIKSLNLGVFSATSVPARGRRRESNKKKDVVAAVEEKRKDQEEIYGQDRIVPECEFTDDFGFNEKLL…				Rorippa islandica|Roisl.0091s0435	0.12	Brassicaceae
Schrenkiella parvula|Sp7g17470	70.5	Brassicaceae	CCTTATAGCCAAATGGTCAAAACACTCAGCATTAAAATGGTCATTACATTTTTTTTTGTTGACTCAATTAATACCTTTTTGTGAGAAATTAACTAAACACAACTAAATATATATTTACAATAAATGAATTATTAAGAAATTAAAAACTAGATTAAATTCCTACTAGCGTTTTCACAAACATTCAACTATGTGTACCCCAAATTCAACAACACCCAATGTATAACGTTTACAGAAGTTTTTTTTTAATTCACATTTTCTTTCAATTGATTTTCAACTTATTTAAATTTACATAAAAATTATATAGCTTAAATTTTCTTTAAGGAAATAATTAACTTGAACTATATATTTAGTAGTAATCTCTCTAAAAATATAACTAGGATTTTTTTTCCCTCACTGTAA…	MVDFYESKPHLMNHHFQAAETPYFTRNHHHHEINLVDEHDPMDLEQNNMMMMRMIPFDYPPTEIIKPMNFAMQDEVSCVSAENDCYKAMSFNKTKPFLTRKLSSSSSSSSWKGKKKSTLVKGQWTAEEDRILIQLVEKYGLRKWSHIAQVLPGRIGKQCRERWHNHLRPDIKKETWSEEEDRVLIDFHKEIGNKWAEIAKRLPGRTENSIKNHWNATKRRQFSKRKCRSKYPRPSLLQDYIKSLDLGALSSSSVPARGRRRESNKKKDIVAVEEKKKKEEEIYGQDRIVPECVFTDDFGFNEKLLEEGCSIDSLLDDLPQPDIDAFVHGI				Sinapis alba|Sialb.0078s0236	0.12	Brassicaceae
Lepidium sativum|Lesat.0002s0098	86	Brassicaceae	TTTGTTTATAATTTTGGTGGAAACATAAGATAACAACACATAATTAGTGCATCAAGCAACTACGTGAGCTATGTAAATGGGATAAAGTTTCATATATGAAGTCTTAATTACATCAATTAACACAAACTCTTATAATAAATTAAGAATGTCAACATCTTACTACCACATAAAACTATTCTTTTTTACATGCAAAATAAAATTTTGATTCTTTTTGATTCATAATTAGACCTTAGAAGCTAAATGGTCAATACACTCCTTTATTTGGCATTTAAAATGATTACTACATTTTGTTTTGTTGACTAAATTAATTAACTTTATAAAAATAACTAAATATACCTACAATCAATGAGTTATCAATACATTAAAAAACTAGATTAAATTCCTAGTAGCGTTTTCACA…	MENFVNKSGFVPLNQNISTHDQQEHMKEEDFPFEVVHQSKPTSFLQDFHHFDHDHHFDHHHHHHHGSSSSNSLLGIQTTSSCINNAPFEHCTYQDNMVKFYETKPHFINHHFQPAENSYFTRNHHQVINLVDEHEHLELEQNNLTMMRMIPFDYPPTEFIKPVNFIMPDEISCVSADNDCYKATSFNKTKPFLTRKLSSSSSSSSWKEKEKPTLVKGQWTAEEDRILIQLVEKYGLRKWSHIAQVLPGRIGKQCRERWHNHLRPDIKKETWSEEEDRVLIEFHKEIGNKWAEIAKRLPGRTENSIKNHWNATKRRQFTKRKCRSKYPRPSLLQDYIKGLNLGVLSASSVPARGRRRESSNKKKDAVAVEENHKGEEIYGQDRIVPDCVFTDDFGFNEKL…				Theobroma cacao|Thecc.03G013800	0.12	Sterculiaceae
Malcolmia maritima|Mamar.0058s0177	90.4	Brassicaceae	CACACATTATTGAGTTTATGTGATGAATTTTCTCGGCCAGTTCAAGCATTTGTTTTCGGTTCTCGTGCTAGACAGAAGATAATCCTACATAACTTACGACTCAAGCAACCACGTGGGTGAGGTTTATGGGCTCATGAAACTCATGTATTAAGTTTGTATTCCATCAATTAAGACTATAAACTAAATGATTAATACAAACTCTTGTAAGAAATTACGAAGGCCAAAATCTAGTACAGTACTGTATATGACAAATCCTTTTTGTCAACTAGACCTTAGAGCTAAATGGTCAATACTCAATACACTTCTTGTCCTTGGCATTTAAAATGGTAATTATATTTTTGTTGACTAAATTAATATACTTTATGAAAAATTAACTAAACACAACTAAATATGCACAAT…	MENFVNESAFVPLNQNIFTRDQEHMKEEDFPFEVVDQSKPTSFLQDFHHLDHDHQFDHHHHHHASASSNHLLGLQTTSSCINNAPFEHCTYQENMVEFYESKPHMMNHHHFQAAENPYFTRNHHQEINLVDEHDHMDLEQNNTMMMRMIPFDYPPTETIKPVNFVMPDEISCVSADNDCYRTNSFNKTKPFFTRKLSSSSSSSSWKEKKRSTLVKGQWTAEEDRILIQLVEKYGLRKWSHIAQVLPGRIGKQCRERWHNHLRPDIKKETWSEEEDRVLIEFHKEIGNKWAEIAKRLPGRTENSIKNHWNATKRRQFSKRKCRSKYPRPSLLQDYIKSLNLGVLSATSVPARGRRRESNKKKEVVVAGEEKKKEEEIYGQDRIVPECVFTDDFGFNEKLL…				Thlaspi arvense|Thlar.0019s0449	0.12	Brassicaceae
Eutrema salsugineum|Thhalv10026824m.g	88.1	Brassicaceae	GTTATGTCATATACTACTATTTTCCAGGCCGGTTCAGGCATTCGTTTTTGATTCTCGTGCGAGACAGAAGTAGCAATACATAACTTGCGCCTGAAGCAACCACGTGGGCTAGGTTTATGGGTCCATGAGACTCATATTTTAAGGTTTAATCCCATCAATTAAGTTATAATGATTATTGCAAACTCTTATAAGAAATTACCAATGCAAAATTCGAGTGTATAAGAAGATATTTCTCTTCTTGAATCCATTAATTAGACCTTAGAGCTAAAATGCTAAATGGTCAAAACACTCCTTAGCATTAAAATAGTTATTACATTTTGTTTGTTGACTCAATTAATACATTTTTTTGAGAAATTAACTAAACACCACTATATATATTTACAATAAATGAATTAACAA…	MENFVDESSFVPLNQTIFTRDQELMKEEDFPFEVVDQSKPTSFLQDFHHLDHEHQFDHHHHGSASSNPLIGIQTMSSCINNAPFEHCSYQGNVVDFYESKPHLMNHHFQAAENPYFTRNHHHHEEIHSVDEHDPMDLEQNNMMMMRMIPFDYPPTEIIKPMNFVMPDEVSCVSADNDCYKALSFNKNKPFLSRKLSSSSSSSSWKGKKKSTLVKGQWTAEEDRILVQLVEKYGLRKWSHIAQVLPGRIGKQCRERWHNHLRPDIKKETWSEEEDKVLIDFHKEIGNKWAEIAKRLPGRTENSIKNHWNATKRRQFSKRKCRSKYPRPSLLQDYIKSLDLGALSASSVPARGRRKESNKKKDVVAVEEKKKKKEDEIYGRDRIVPECVFTDDFGFNEKLL…				Arabidopsis thaliana|AtMYB64	1.7	Brassicaceae
Thlaspi arvense|Thlar.0019s0449	88.2	Brassicaceae	TCAGGCATACGTGGTTCTCGTGCGAGACAGAAGTAGCAATACATAACTTGCGCCTGAAGCAACAACGTGGTCTAGGTTTTTGGTCCCATGAGACCCATGTTTTAAGTTCCAATCCCATGAATTAAATTTATATCAAACGAAAGGATTAATACAAACTTTTCTAAGAAATTACGATCCGTCTATAAAATACTACTTTTGTTTTAGGTGAAACGAAGATATTTATTTTCTTGAATCCTTTAATTAAGACCGTAGAGCTAAATGGTCAAAACACTCCTTAGCATGAAAATAGTTATTATTTCTTTTTTTTTGGTTGACTCAATTAACACATTTTTGTGAGAAATTTATTTAAACACAACTAAATATATTTACAATAAATTTATTAACACATTAAAAGCTACA…	MENFVDESSFVPLNQTIFTQEQMKEEDFPFEVVDQSKPTSFLQDFHHLDHDHQFDDHHHGSASSNPLMGMQTMSSCINNAPFEHYSYQENVVDFYESKPHLMNHHFQATENPYFTRNHHHHLHQEIHLVDEHDPMDMEQNNMMMMSRMIPFDYPPTETIKPMNFVMPDEVSCVSADNDCYKSLSFNQTKPFLTRKLSSSSSSSSWKGKKKSTLVKGQWTAEEDRILIQLVEKYGLRKWSHIAQVLPGRIGKQCRERWHNHLRPDIKKETWSEEEDRVLIEFHKEIGNKWAEIAKRLPGRTENSIKNHWNATKRRQFSKRKCRSKYPRPSLLQDYIKSLDLGVLSSSSVPARGRRRESNKKKDVEAVEEKKKNKEEEIYGRDRIVPECVFTDDFGFNEKL…				Alyssum linifolium|Alyli.0011s0362	1.7	Brassicaceae
Cakile maritima|Camar.0022s0053	85.5	Brassicaceae	TGCTTTCAGTGTATAAATTTTCATAACGAGTTTACTTCCAGTGTCCATTTATTTTCCTGCCGGTTGCGGCATTTGTTTTGGACTCTGGTGCAGACAGAAGGTAACAATCAATCACTTGCGCACAAAGCAACCATGTGGTCTAGGTTTCTGAGCCCATGCATGAAACGGTCTCATTGATGAGACCCATGTTTTAAGTTTTGGATCCCATCAATTAAGTAATCAAATGATTCATTTCTATAGAACAAAATACAAATAAAATAATGCAAAATATGGCATAGAAGATGCTATTCATTTATGTTTTTTTAGGTCAAACGAAGATATTTCTAATCCATTAATTAGCTAAATGGTCAAAACACTACTTAGCATTAAAATGGTTATTACATTTTTTTGCTGACTCAA…	MENYVDERGFAPLNQTIFTRDQEHMKEEDFPFEVVDQSKPTNFLQDFNHLDHDHQFDHHYHNHVSTTSSNPLFGIQTTSSCVDNAPYQPCIYQENMVDFYETKPQVMINHHFQAAENPYFTRNHHHQEINLVDDNDRHMNLEQNNMLMMRMIPFDYPPTETINKPMNFVMPDEVSCVSADNNSYRAMSFNKTKPFLTRKLSSSSSSSSWKGKKKTTLVKGQWTTEEDRVLIQLVEKYGLRKWSHIAQVLPGRIGKQCRERWHNHLRPDIKKETWGEEEDRVLIEFHKEIGNKWAEIAKRLPGRTENSIKNHWNATKRRQFSKRKCRSKHPRPSLLQDYIKSLDVGVLSSSSVPARGRRRESNKKKDVVAVEEKKKEKEKEEEFYGQDRIVPECVFTDDF…				Capsella grandiflora|Cagra.4306s0015	1.7	Brassicaceae
Rorippa islandica|Roisl.0091s0435	89.3	Brassicaceae	TTCTCCTGCGAGACAGGATAACAATACATACCTTGTGCCTCAAGCAACCATGTGGGATAGGTTTATGGAATCATGAGACTTACGTATTAAGTTTTCAATCCCATATATTAAGTTATATATTAAACTAAATGATTAATACAAACTCTTAAGACATTACGAATGCCAAAATCTAGTTAGTGTATGAGAAACTATATATATATATATATATATATATATATTTTTTTTTTTGTTTTAACGTGAATAGGAGATATTTTCTCTTTCTCAATCCATTATTTAGACCTTAGAGCTAAATGGTCAATATACTCCTTAGCACTGAAAATGGCTATTACATTTTTTTGTTGACTAAGTTAATACACTATGAAAAATTAATTAAACAAAACTAAATATATGAAAATAAAT…	MENFVDESGFVPLNQTIFRRDQEYMKEEDYPFEVVDQSKPTSFLQDFHHLDHDHQFDHHHHHHHGSTSSNPLLGIQTTSSCINNAPFEHCSYQENMVEFYESKPNLMNHHFQAAENSYFTRNHHQVINLADEHDHMDMEQNNNMMMMRMIPFDYPPTETIKPVNFIIPDEISCVSADNDCYRATSFNKTKPFFTRKLSSSSSSSSWKEKKKSTLVKGQWTAEEDRILIQLVEKYGLRKWSHIAQVLPGRIGKQCRERWHNHLRPDIKKETWSEEEDKVLIEFHKEIGNKWAEIAKKLPGRTENSIKNHWNATKRRQFSKRKCRSKYPRPSLLQDYIKSLNLGVLSATSVPARGRRRESNKKKDVVVVAVEEKKKEEEIYGHDRVVPECVFTVDFGFNEK…				Capsella rubella|Carub.0007s2247	1.7	Brassicaceae
Brassica rapa|Brara.A00985	85.6	Brassicaceae	AGTTTTTACGTCCAGTGTTCATTTATTTTTCTGCCGGTTCAGGCGTTTGTTTTCCATTCTGGTGCAGACAGAAGATAACAATCGATCACTTGCGCCCAAAGCAATTATGTGGTCTAGGTTTCTGAGCTCATGCACGAGACCCATGTTTTAGGTTTTAATCCCATCAATTAAGTTATCCAATGATTAATTTTCTATATAAAAAATACAAATGCAAATGCAAAATCTAGCATAGAAGATGCTATTCAATTTTTTTTACGTCAAACGAAGATATTTCTATTCTTGAATCCATTAATTAGCTAAATGGTCAAAACACTTCTTAGCATTAAAATGGGTATTATATTTTTTTGCTGACTCAATTAATACCTTTCTgtgacaaagtaACTAAAGACAACTAAATAA…	MENYVDESGFAPLNQTIFTRDQEHMKEEDFPFEVVDQSKPTSFLQDFHHLDHDNQFDHHHHHHHHHQYHGSTSSNPLFGIQTTSSCANNNPYQHCSYQENMVDFYETKPQVMNHHFQAAENPYFTRNHHQEINLVDDHDHMNLEQNNMMMMRMIPFDYPPTETINKPMNFVMPDEVSCVSADNNSYRAMSFNKTKPFLTRKLSSSSSSSSWKGKKKTTLVKGQWTAEEDRILIQLVEKYGLRKWSHIAQVLSGRIGKQCRERWHNHLRPDIKKETWSEEEDRVLIEFHKEIGNKWAEIAKRLPGRTENSIKNHWNATKRRQFSKRKCRSKYPRPSLLQDYIKSLDVGVLSSSSVPARGRRKESSKKKDVVAVEEKKKEKEKEKEKEDEFYGQDRIVPEC…				Caulanthus amplexicaulis|Caamp.0190s1050	1.7	Brassicaceae
Brassica oleracea|Bol029896	88	Brassicaceae	TTTTACATAAATTTCTGCTACTTGATCAATTTAGGCTTGAATTTCAATCTACATGATAGTTTAGTAATATGCAATCTGGTTAATTCATAACGTTACTCGAATGAAACAATATGATATTCAAACTATTATGTAACGGTGGTTTTTTCGTGACTGGATCAGCCGATAAAGAAAATAAAGAAATCTCTTACATAAGACGACATTACGAATGCACAAATCCAGCATAGAAGGTGATATTCTTTTGTACGTCAAACGAAGATGTTTCTCTTCTTGAAATATATATGTTTAGACCAGACCTTATAGCTAAATGGTCAAAATAATCTTTAGCATTGAAATTGTAATTACATTTTTTGTTGACTAAATTACTACCTTTTGTCAGAAATTAACCAAACACGACTAAAT…	MENYVGESGFATLNLTKFTRDEEHMKEEDFPFEVVDQSKPTSFLQDFHHLDHDHQFDHHYHHHHGSTSSNPLLGAPRTLSCINKVPLQNCSYQENLVDFYESKPHLMNHHFQASDNQYFTRDHHQEISLVDEHNPVDLEQNNMMMMRMLPFEYPPTAIIKPTNFMMPDEVSCVSADNNCYKAMSFNKTKPFLTRNLSSSSSSSSWKGKNNTTLVKGQWTAEEDRILVQLVEKYGLRKWSHIAQVLPGRIGKQCRERWHNHLRPDIKKETWSEDEDRVLIEFHKEIGNKWAEIAKRLPGRTENSIKNHWNATKRRQFSKRKCRSKYPRPSTTRKQRHTEGKNRRGRRKESNKKKDIVAVEKKKKKKEEKFYGQDRVVPECVFADGFGFNENLLEEGCSID…				Cucumis sativus|Cucsa.196850	1.7	Cucurbitaceae
Capsella rubella|Carub.0007s2247	90.1	Brassicaceae	CCCTGATGAATTTTCTCAGCTGGTTCAAGCATATGTTTTTGGTTCTCGTGCAGACAGAAGATAATACTTACGTCTCAAGCAACCACGTGAGCTAGGTTTATGGGCTCATGAAACTCATGTATTAAGTTTTTACCCCATCAATTAAGCTATATATACTATATAATAGTCTATATGATTAATATACAAACTCCTATAAGAAATTACGAATCCAAAACTAAAGCTAGTACGGTAGTACTACATATACCTGATACTATTCCTAAATAGTCATTACACTCCGATCCTTGTCCTTGGCCTTTAAAATGGTAATTACATCTTTGTTGACTAAATTAATAGACTTTTATATATATAAAAAATCTAACTAAACATAATTAAAATATTGACAATAAATGAGTTGTTAAC…	MENFVDESGGFVPLNQNIFTRDQEHMKEEDFPFEVVDQSKPTSFLQDFHHLDHHHQFDHHHHHHQGSSSSNHLLGLQTTSSCINNAPFEHCSYQENMVEFYESKPHLTMNHHFQAPENPTYFTRNHHHHHHQEINLVDEHEHMDLEQNNMMMMRMIPFDYPPTETVKPMNLVMPDEISCVSADTDCYRATSFNKTKPYLTRKLSSSSSSSSWKEKKTSTLVKGQWTAEEDRILIQLVDKYGLRKWSHIAQVLPGRIGKQCRERWHNHLRPDIKKETWSEEEDRVLIEFHKEIGNKWAEIAKRLPGRTENSIKNHWNATKRRQFSKRKCRSKYPRPSLLQDYIKSLNLGVLSASSVPARGRRRESNKKKDVVAAVEEKKKDQEEIYGEDRIVPECVFTDD…				Descurainia sophioides|Desop.0243s0629	1.7	Brassicaceae
Alyssum linifolium|Alyli.0011s0362	89.5	Brassicaceae	ATTTCGGTTCTCGTGCGAGACAGAAGATAAGAAGACACAAATTGCGCCTCAAGCAACCAGGTGGGCTATGGACTCTTGTCATGTATTAAATTCTAAACCCATTAATTAAGTTATACTATCAAATGGTTAACTAATATTACAAATGCAAAATTCTAGTACGATGTAAGACAGTACAATCCTTTTTTTTTGTCAACAATTCTTTTTTATGTGAAACGAAGATATTTATTCATTTTAAATCCATTAATTAGACCTTAGAGTTTGCCGACAAATTTTGTTTAGACCTTAGAGCTAAATGGTCAATACACACTCATTAGCATTAAAAATGACTTACATTTTTTGTTGACTAAATTAACTCATTTTATGAAAAATTAACTAAGCACAACTAAATATCTACAATAA…	MENFVDESGFVPLNHNILTRDQQHMKEEDFPFEVVDQSKPTSFLQDFHHLDHDHQFDHHHHHHGSTSSNPLLGIQTSSSCINNAPFEHCSYQENMVEFYESKPQLMNHHFQVAENSYFTRNHHQVINLVDEHDHMDLEQNDMMTRMIPFDYPPTDIIKPMNFVMPDEISCVSADNDCYKATSFNKTKPFLTRKLSSSSSSSSWKGKKKSTLVKGQWTAEEDRILIQLVEKYGLRKWSHIAQVLPGRIGKQCRERWHNHLRPDIKKETWSEEEDRVLIEFHKEIGNKWAEIAKRLPGRTENSIKNHWNATKRRQFSKRKCRSKYPRPSPLQDYIKSLNLGVLSATSVPARGRRRESNKKKDFVAVEEKTKKEEEIYGQDRIVPECVFTDDFGFNEKLLEE…				Eruca vesicaria|Eruve.0001s0102	1.7	Brassicaceae
Descurainia sophioides|Desop.0243s0629	89.5	Brassicaceae	AGGCATTTCGGTTCTCGTGCGAGACAGAAGATAAGAAGACACAAATTGTGCCTCAAGCAACCAGGTGGGCTATGGACTCATGTCTTAAATTCTAAACCAATTAATTAAGTTATACTATCAAATGGTTAACTAATATTACAAATGCAAAATTCTAGTACGATGTAAGACAGTACAATTCTTGTTTTTTTGTCAACAATTCTTTTTTATGTGAAACGAAGATATTTATTCATTTTAAATCCATTAATTAGACCTTAGAGTTTGCCGACAAATTTTGTTTAGACCTTAGAGCTAAATGGTCAATACACACTCATTAGCATTAAAAATGACTATTACATTTTTTTGTTGACTAAATTAACTCATTTTATGAAAAATTAACTAAGCACAACTAAATATCTACAA…	MENFVDESGFVPLNHNIFTRDQQHMKEEDFPFEVVDQSKPTSFLQDFHHLDHDHQFDHHHHHHGPTSSNPLLGIQTSSSCINNAPFEHCSYQENMVEFYESKPQLMNHHFQVAENSYFTRNHHQVINLVDEHDHMDLEQNNMMTRMIPFDYPPTDIIKPMNFVMPDEISCVSADNDCYKATSFNKTKPFLTRKLSSSSSSSSWKGKKKSTLVKGQWTAEEDRILIQLVEKYGLRKWSHIAQVLPGRIGKQCRERWHNHLRPDIKKETWSEEEDRVLIEFHKEIGNKWAEIAKRLPGRTENSIKNHWNATKRRQFSKRKCRSKYPRPSLLQDYIKSLNLGVLSATSVPARGRRRESNKKKDFVAVEEKKKKEEEIYGQDRIVPECVFTDDFGFNEKLLEE…				Euclidium syriacum|Eusyr.0033s0018	1.7	Brassicaceae
Capsella grandiflora|Cagra.4306s0015	89.9	Brassicaceae	ATGCCCTGATGAATTTTCTCAGCTGGTTCAAGCATATGTTTTTGGTTCTCGTGCAGACAGAAGATAATACTTACGTCTCAAGCAACCACGTGAGCTAGGTTTATGGGCTCATGAAACTCATGTGTATTAAGATTTTACCCCATCAATTAAGGTATACTATATAATAGTCTATAAACTACAGTATATGATTTAACAAACTCCTATAAGAAATTACGAATCCAAAAGCTAGTACGGTAGTACTACATATAAGACTATTCCTAAATAGTCATTACACTCCGATCCTTGTCCTTGGCCTTTAAAATGGTAATTACATCTTTGTTGACTAAATTAATAGACTTTTATATATATAAAAAAATCTAACTAAACACAATTAAAAAATATTGACAATAAATGAGTTGT…	MENFVDESGGFVPLNQNIFTRDQEHMKEEDFPFEVVDQSKPTSFLQDFHHLDHHHQFDHHHHHHQGSSSSNHLLGLQTTSSCINNAPFEHCSYQENMVEFYESKPHLTMNHHFQAPEDPTYFTRNHHHHHHQEINLVDEHEHMDLEQNNMMMMRMIPFDYPPTETVKPMNLVMPDEISCVSADTDCYRATSFNKTKPYLTRKLSSSSSSSSWKEKKTSTLVKGQWTAEEDRILIQLVDKYGLRKWSHIAQVLPGRIGKQCRERWHNHLRPDIKKETWSEEEDRVLIEFHKEIGNKWAEIAKRLPGRTENSIKNHWNATKRRQFSKRKCRSKYPRPSLLQDYIKSLNLGVLSASSVPARGRRRESNKKKDVVAAVEEKKKDQEEIYGEDRIVPECVFTDD…				Eutrema salsugineum|Thhalv10026824m.g	1.7	Brassicaceae
Euclidium syriacum|Eusyr.0033s0018	84.5	Brassicaceae	TTCAGTAATTTGTTTCGGAGTCTCGTGCGAGACAGTAGATAACCACACATAACTTGTAGCTCAAGCAACCACGTGGTTAGGTTTATGGGCCCATGAGTCCCATGCATTTTTCTAAGTTTTAATATTGAACTAAATAAAAACTCTTATGAGAAATTAAGAATGCAAAAGTCTAGTATATATATAATTGAGATAACCATTCTCTATTAGGTGAAAAAGAAGAAGATAATTACTCATTTTGAATCCATTAATCTAGTTCTTATGGCTAAAAGGTCAATACATTTCTTACCAATTAAAATGGTTATTACAATTTTGTTGACTAAATTAATCACTTTGTGAAAAATTAACTAAACACAACTAAATATAAATACAATAAATGAGTTAACACATTAAAAACTAGAC…	MENFVDESVFVPLNQTIFTRSDHQEQMKEEDFPFEDVDQSKPTSFLQDFHHLDHDHQFDHHHGSTSSNPLLGIQSINNAPFEHCAYQENIVDFYESKPNFMNHHHHQFQAAENSYFTRNHINLVDEHDQHNHHMDLDQNNMMMMRMIPFDYPPGEIIKPVNFVMPDEVSCVSADNDCYKGFNNTKPFLTRKLSSSSSSSSAWKGKKKSTLVKGQWTAEEDRILVQLVEKYGLRKWSHIAQVLPGRIGKQCRERWHNHLRPDIKKETWSEEEDKVLIEFHKEIGNKWAEIAKRLPGRTENSIKNHWNATKRRQFSKRKCRSKYPRPSLLQDYIKGLNLQALSASSVPARGRRRESNKKKDVVVAVEEKEKEKKDDEIYGQDRIVPECVFTDDFGFNEKLL…				Lunaria annua|Luann.0044s0137	1.7	Brassicaceae
Lunaria annua|Luann.0044s0137	87	Brassicaceae	TGATCAATACAAACTCATACAGAATTAGGAATGCAAATATCTTGTACTATAAGATAAAATACTACTCCCATGAGTTCCAATGAATATTTTAGAGATTTTTCTTGTTTTATTTTATTTGAATTTTAAAAAAAAAAATTCGATGAGAAAGTAATTTTATTTGATATATTATGACTATATATTTTATTAATTGGTTAAAATTGTTTATAATTAATTGTTAAATTATTTATATTCTGAAATTGTTTATATATATATATTTTTTTGTCAACAATTCTGAAATTGTTTATATAATTTCTTAACTAAACATAATATACAGTGGGCATTAAAGCTAAATGGTCAATACACTCCTTAGCATTAAAAATGGTTACTACATTTTGTTTTGGCTCAATTAAACTAAAACAC…	MENFVYESSFVPLNQTIFTHDQEQMKEEDFPFEVVDQSKPTSFLQDFHHLDHHHQFEQHHHHHGSTSSNPLLGIRTTSSCINNAPFEHCSYQENMLEFYESKPQVMNHHHFQAAENPCFTRNHHQEINLVDEHDHDHMDLEQNNMMMMRMIPFDYPPSEIIKPMNFVMPDEVSCVSADNDCYKAMSFNKTKPFLTRKLSSSSSSSSSWKENKNSTLVKGQWTAEEDRILIQLVEKYGLRKWSHIAQVLPGRIGKQCRERWHNHLRPDIKKETWSEEEDKVLIEFHKEIGNKWAEIAKRLPGRTENSIKNHWNATKRRQFSKRKCRSKYPRPSLLQDYIKRLNPGALSSSSVPARGRRRESNKKKDVFAGEEKKMKKEEEIYVQDRIVRECVFTDDFEFN…				Malcolmia maritima|Mamar.0058s0177	1.7	Brassicaceae
Diptychocarpus strictus|Distr.0008s100500	82.8	Brassicaceae	TTCACGATTATGTGTGTTGATCAAGATTCACATCCAAGTTCTGTGTTATGTGTGTTATCTTTAATATGCTTTTAGTTACCATCTGCGTGTTATTGTATACATAATTCTCAACTTGTGCCTCAAGCAACCACGTGGGTTAGGTTTATGAGCCAAACCCCATGTTTTAACTAATACAAAATTTTATAAGAAATTATTACAAATGCAAAAAATCTACTACAATATATAAGAAGACAATTACTTCTTTTGAATCCATGGTCAAATACCTTTCTTACCGATTAAAATGGTTATTATTACATTTTTTTGTTGACTAAGTTAATACACTTTGTGAAAAATTAACTAAACAAAACTAAATACGAATATCTACAATAAATGAGTTATTAACACATTAAAAACTATATT…	MENFVDESGFVPLNQTIFNQEQMKEEDFPFEVVDQSKPTSFLQDFHHLDHDHHHFDHHHGSSSSNPLLGIQSINNASSFEHCSSYQENLVDFYECKPHLMHHHHHQFQAAENPYFTHNHINLVDDHHMDLDQNNMMMMRMIPNFDYPPGGEIIKPVNFVLPDEVSCVSADNDCYKAMTGFNKTKPFLTRKLSSSSSSSSWKGKKKSTLVKGQWTAEEDRILVQLVEKYGFRKWSHIAQVLPGRIGKQCRERWHNHLRPDIKKETWSEEEDKVLIEFHKEIGNKWAEIAKRLPGRTENSIKNHWNATKRRQFSKRKCRSKYPRPSLLQDYIKSLNLQVLAASSVPARGRRKEKKVVVAVEEKKEEEIYEEDRIVPECVFTDDFGFNEKLLEEGCSIDSLL…				Medicago truncatula|Medtr4g105660	1.7	Fabaceae
Isatis tinctoria|Isati.1353s0019	87.1	Brassicaceae	CTTGAACTATATTTAGTACTCTAAAAATGAAACTATATTTTTTTCTCTCACTGTACTTAGGGGGGCTTATTGAATCAATGAATTGAAAGGAATTCATTTTCTTCATAAATCCTCTCTTATTGGATTTAACATTTGTAACATTTCTTTAAAATCTCAGCTTATTGGATTAATCATTTGTACAATTCTTTTAAAATTCCAGCTTATTGGAAATTTGGAATTTCATTAATGAATTCTATCAGATAGGATTTGAAGGGAATTGAAAGACAATTTATAGTTAAAATTTTATGAATACAAATACCACCTCTTATGGTGGTATTTGAAGATTTTTTTTAAACTTTTTGTTTCAATTTAAGAAAAAAGTAAATCAAAACTTTTTAAAATGAGAAAAAAAAACATTAA…	MENYVDESGFAPLNQTIFVTRDQEHMKEEDFPFEVVDQSKPTSFLQDFHHLDHDHQFDHHRHQQHHQHGSTSSNPLLSVQTTSSCVNNAPFEHCSYQENMVDCYESKPHLINHHFQATENPYFTRNHHQEINLVDERGPMDNNMMMMRMIPFDYPPTEIIKPMNFVMPDEVSCLSANNDCYGAMSFNKTKPFLTRKLSSSSSSASWKGKKKTTLVKGQWTAEEDRILIQLVEKYGLRKWSHIAQVLPGRIGKQCRERWHNHLRPDIKKETWSEEEDRVLIEFHKEIGNKWAEIAKRLPGRTENSIKNHWNATKRRQFSKRKCRSKYPRPSLLQDYIKSLDLGVLSSSSVPARGRRRESNKKKDVVAVEEKKKKEEEIYGQDRIVPECVFTDEFGFNEKL…				Setaria italica|Seita.9G054400	1.7	Poaceae
Arabidopsis lyrata|AL7G35480	93.2	Brassicaceae	ATCATCTTTTTTTTTTTGTAACCCCATACATGAATTAATAATAAAGGTCTTGTAAAAAAGTTTTCGGACGGAATTCAGATTTAGGCAGAAAAAAAGAAATACATGCATGAACTAATGAACTAACAAGTTGTACTAATTCATAAACAAACTAAATTATTTGAGAGAAAATCTACTACATACTTCGGTCAGAGACTTTTTGTGAGGGTTTACTTCTAGAAGACGGAGTGAACAAAATGAAAAATTAGACCTTAGAGCTAAAATGGTCAAAACACTCCTTGTCCTTGGCATTTAAAATGGTAATTACATTTTTGTTGACTAAATTAATACTATACTTTATGATAAATTAACTAAACACAACTAAATATATAATAAATGAGTTATTTACACATTAAAAACTAG…	MENFVDENAFVPLNQNIFTRDQEHMKEEDFPFEVVDQSKPISFLQDFHHLDHHHQFDHHHHGSSSSHPLLGHQATSSCINNAPFQHCSYQENMSEFYETKPHLMNHHFQAAENSYFTHNNHHQEINMVDEHDPMDLDQNNMMMMRMIPFDYPPTETFKPMNFVMPDEISCVSADNDCYRATSFNKTKPFLTRKLSSSSSSSSWKENKKSTLVKGQWTSEEDRVLIQLVEKYGLRKWSHIAQVLPGRIGKQCRERWHNHLRPDIKKETWSEEEDRVLIEFHKEIGNKWAEIAKRLPGRTENSIKNHWNATKRRQFSKRKCRSKYPRPSLLQDYIKSLNMGVLSASSVPARGRRRESNKKKDVVVAAVEEKKKEEEIYGQDRIVPECVFTDDFGFNEKLLE…				Setaria viridis|Sevir.9G053900	1.7	Poaceae
Iberis amara|Ibeam.6525s0002	78.1	Brassicaceae	AAAATTTGAAATAGCTTTAAAACTTCAAATTTAAACCCTAAAACCTCAAAACCAAACCCTACCCCTTCAAAACTAAACCCTAAACTCTATTTAGTGAACCCAAACCCAAAATTTTAAATTCTAAACCCTTAAAATTCACTTTTTATGTTTGTGGTACTTTTGGAACATTTGAGAGTGTGTGGTATTTTTAGAACTTTTGGAAGTGTGTGGTAGTTTTGGAATTTGAACTTCTTTTGATGGTGTTTCAAGGAATTCCTCTGTTTTTAATCTTTCCTTAGATATAATTCGTCAAAATACTCAGAATTAAAATGGTTATGACATTTCTGTTGACTAAATCAGTAAAAATTAACTAAACACAACTAAATATATTTGCAATAAATGAATTATTAACTCATTTAA…	MENLVGESSFVPLNQTVFTSDQEHMKIEDFPFEVIDHSKPTSFLQDFHHLDHNNQFDHHGSSSSSSNPLLGIQTTSSCINNSLFQHCSYQENMEEFYESKPHLMNHHHFQATNNPYFTQHQEINLVDENDPIGMEQNNMMMMMPFDYPPTQIIKPVNLVMLDEVSCVSADNNDCYKATTFKKTGPFLTRKLSSSSSSSSWKGKTKSSLVKGQWTSEEDRILFQLVEKYGLRKWSQISQVLPGRIGKQCRERWHNHLRPDIKKETWSEEEDKVLIKFHKEIGNKWAEIAKRLPGRTENSIKNHWNATKRRQFSKRKCRSKNPSLLQDYIKSLDLGVLSSSSVPARGRRRESNKKKDVFMVEEKKKKKKEDRIYEQERIVPECVFTDDFGFNEKMIEEGCS…
Gossypium barbadense|Gobar.D12G304300	42.8	Malvaceae	AGGGTTTTACATATGTTCATGAAAAATAATTACAAATGTTACATTATTTTTGAAATCCAAGTCTTCAATATTTGTATTATGACTTGAAAACCAGTTGTTAGAATGTTAGTGCCTTCAAAGCTAACACATCTAAGCTTTTGTCTTTCCTTTCTGTCATATGGTATTTAAACTTGTTCTTAGTTAATAGGAATGACAATAATGTAAATTAAAGCAGGTAATGTAAGAGTTTAAGACGAATGGGATGCGTTAGTATTGAGTCCGAGTCTATGTCTGACCGTCATTAAGTATTTAATACAGCTATTAATTGCATCTATTTTTTGTAATGAGAATTAACAAAATGGCCTTAATTGCGTTTTTTGATATTTTCAACTCCTAAATTAAATTCTAGTTCATGTTCTT…	MAKRYFTLVLVLIASSMEFDPKLRENMSPQHQHHPMMLSENNILKPLQTTTPLSSSSSKDYYLQDFHHLDDDDDDDQIQVNVSSSSWNPVFGVNAACYDPFDAFPYGCSTNRVDFYECKPFAADHNTGNLGHGHVMDNFQSSVGLLNLRNTISNDVIMMGSDVGYLPSFEFPNLGDEVPCVTAENGYRLLVDSTSSRIRTNWKGRKKTNGVKGQWTMEEDRMLIQLVEQYGVRKWSHIAQMLPGRIGKQCRERWHNHLRPDIKKDTWSEEEDKVLIQAHREIGNKWAEIAKRLPGRTENSIKNHWNATKRRQFSKRKCRSKYPRGSILQEYIKSLNLDSTAAAAARSHEKASDGAAVKAADNKSSSIKQPQGLDIGPSTDRLVPEYECDEVHEFSFDEK…
Gossypium darwinii|Godar.A12G310300	42.5	Malvaceae	AAGGGTTTTACATGTGTTCATGAAAAATAATTACAAATGTTACATTATTTTTGAAATCCAAGTCTTCAATATTTGTATTATGACTTGAAAACCAGTTGTTAGAATGTTAGTGCCTTCAAAGCTAACACATCTAAGCTTTTGTCTTTCCTTTCTGTCATATGGTATTTAAACTTGTTCTTAGTTAATAGGAATGACAATAATGTAAATTAAAGCAGGTAATGTAAGAGTTTAAGACGAATGGGATGCGTTAGTATTGAGTCCGAGTCTATGTCTGACCGTCATCAAGTATTTAATACAGCTATTAATTGCATCTATTTTTTGTAATGAGAATTAACAATATGGCCTTAATTGCGTTTTTTGATATTTTCAACTCCTAAATTAAATTCTAGTTCATTGTCT…	MAKRYFTLVLVLIASSMEFDPKLRENMSPQHQHHPMMLSENNILKPLQTTTPLSSSSSKDYYLQDFHHLDDDDDDQIQVNVSSSSWNPVFGVNAACYDPFDAFPYGCSTNRVDFYECKPFAADHNTGNLGHGHVMDNFQSSVGLLNLRNTISNDVIMMGSDVGYLPSFEFPNLGDEVSCVTAENGYRLLVDSTSSRIRTNWKGRKKTNGVKGQWTMEEDRMLIQLVEQYGVRKWSHIAQMLPGRIGKQCRERWHNHLRPDIKKDTWSEEEDKVLIQAHREIGNKWAEIAKRLPGRTENSIKNHWNATKRRQFSKRKCRSKYPRGSILQEYIKSLNLDSTAAAAARSHEKASDGAAVKAADNKSSSIKQPQGLDIGPSTDRLVPEYEYDEVHEFSFDEKL…
Gossypium hirsutum|Gohir.D12G275300	44.1	Malvaceae	TTTGAAATCCAAGTCTTCAATATTTGTATTATGACTTGAAAACCAGTTGTTAGAATGTTAGTGCCTTCAAAGCTAACACATCTAAGCTTTTGTCTTTCCTTTCTGTCATATGGTATTTAAACTTGTTCTTAGTTAATAGGAATGACAATAATGTAAATTAAAGCAGGTAATGTAAGAGTTTAAGACGAATGGGATGCGTTAGTATTGAGTCCGAGTCTATGTCTGACCGTCATTAAGTATTTAATACAGCTATTAATTGCATCTATTTTTTGTAATGAGAATTAACAAAATGGCCTTAATTGCGTTTTTTGATATTTTCAACTCCTAAATTAAATTCTAGTTCATGTTCTTTTGCTATACCTCGTCCAACAAAAAAAAGTTCCACCTTTTACAGGCTTT…	MEFDPNLRENMSPQHQHHPMMLSENNILKPLQTTTPLSSSSSKDYYLQDFHHLDDDDDDDQIQVNVSSSSWNPVFGVNAACYDPFDAFPYGCSTNRVDFYECKPFAADHNTGNLGHGHVMDNFQSSVGLLNLRNTISNDVIMMGSDVGYLPSFEFPNLGDEVPCVTAENGYRLLVDSTSSRIRTNWKGRKKTNGVKGQWTMEEDRMLIQLVEQYGVRKWSHIAQMLPGRIGKQCRERWHNHLRPDIKKDTWSEEEDKVLIQAHREIGNKWAEIAKRLPGRTENSIKNHWNATKRRQFSKRKCRSKYPRGSILQEYIKSLNLDSTAAAAARSHEKASDGAAVKAADNKSSSIKQPQGLDIGPSTDRLVPEYECDEVHEFSFDEKLLQESCSIELLLDQIP…
Gossypium raimondii|Gorai.008G295800	43.4	Malvaceae	TTTGAAATCCAAGTCTTCAATATTTGTATTATGACTTGAAAACCAGTTGTTAGAATGTTAGTGCCTTCAAAGCTAACACATCTAAGCTTTTTTCTTTCCTTTCTGTCATATGGTATTTAAACTTGTTCTTAGTTAATAGGAATGACAATAATGTAAATTAAAGCAGGTAATGTAAGAGTTTAAGACGAATGGGATGCGTTAGTATTGAGTCCGAGTCTATGTCTGACCGTCATTAAGTATTTAATACAGCTATTAATTGCATCTATTTTTTGTAATGAGAATTAACAAAATGGCCTTAATTGCGTTTTTTGATATTTTCAACTCCTAAATTAAATTCTAGTTCATGTTCTTTTGCTATACCTCGTCCAACAAAAAAAAGTTCCACCTTTTACAGGCTTT…	MEFDPKLRENMSPQHQHHPMMLSENNILKPLQTTTPLSSSSSKDYYLQDFHHLDDDDDDQIQVNVSTSSWNPVFGVNAACYDPFDAFPYGCSTNRVDFYECKPFAADHNTGNLGHGHVMGNFQSSVGLLNLRSTTSNDVIMMGSDVGYLPSFEFPNLGDEVPCVTAENGYRLLVDSTSSRIRTNWKGRKKTNGVKGQWTMEEDRMLIQLVEQYGVRKWSHIAQMLPGRIGKQCRERWHNHLRPDIKKDTWSEEEDKVLIQAHREIGNKWAEIAKRLPGRTENSIKNHWNATKRRQFSKRKCRSKYPRGSILQEYIKSLNLDSTAAAAARSHEKASDGAAVKAADNKSSSIKQPQGLDIGPSTDRLVPEYECDEVHEFSFDEKLLQESCSIELLLDQIPS…
Panicum virgatum|Pavir.1NG015400	32	Poaceae	GCCGGGTCCACATGTCGGGGCCCCGCTTAGTGTACGTGCTCCCCTTGGTCATATAAAAGGGAGAGCACGCATGGTAGGATGACAAGTTCACACAGACACAAGTTCTCGGGACTTCTTCCAGGTCTCTCTCCTCCTCCACACTCTCGCTCAAGCCCAGGGCTCTAGCAAGCTCTCATACAGCACTCTCTAAGCTCTGGCAATACAACTCACAGTGGACGTAGGGTATTACGCTCCGGCGGCCCGAACCACTCTAAATCCTTGTGTGCTTTTCGTGTTCATACGCCTCTAGATCGAGCATTCCTTGGCTGTCCCCAAACTCATCCTGCACTTAGAATTAGGCGGGTTCAATCCGCCACCCGGCTGGAGAAATCCTTCGACACCCATCATCAAGCAAGCGCA…	MDFSCFQPNAGICNYLPFDCMQQNGYYDFHPADHPFEATGDYISAGSMVPPATFDDLGHQYFEEREIKKPIFNHASSIGHRFGSQLPLLTPKTEVPHPVESGLGSYKAYEMSDRFVPRKKTSSNSLKKPNVVKGQWTPEEDRKLVKLVEQFGLRKWSYIAQMLPGRVGKQCRERWHNHLRPNIKKDIWSEEEDMVLIQAHKEVGNKWAEIAKRLPGRTENSIKNHWNATKRRQFARRRSRTSSKGPKSGTLLQNYIKGLGIGPSKNVAPLAQPTLPPSSPATPGSKSAKIDEMLEHSPSDILDSQGMLGVHEYNCSETDQSCEELLAPICSDDFSVVDMCEGLFDTKEDGSCFQVFTVDDDVDMSYIFNHLDHAIKVDPEIDMEMMWDDAALGCAEPAG…
Gossypium mustelinum|Gomus.A12G299100	43.8	Malvaceae	TTTGAAATCCAAGTCTTCAATATTTGTATTATGACTTGAAAACCAGTTGTTAGAATGTTAGTGCCTTCAAAGCTAACACATCTAAGCTTTTGTCTTTCCTTTCTGTCATATGGTATTTAAACTTGTTCTTAGTTAATAGGAATGACAATAATGTAAATTAAAGCAGGTAATGTAAGAGTTTAAGACGAATGGGATGCGTTAGTATTGAGTCCGAGTCTATGTCTGACCGTCATCAAGTATTTAATACAGCTATTAATTTGCATCTATTTTTTGTAATGAGAATTAACAATATGGCCTTAATTGCGTTTTTGGATGTTTTCAACTCCTAAATTAAATTCTAGTTCATTGTCTTTTGCTATACCTTGTCCAACAAAAAAAGTTTCACCTTTTACAAGCTTT…	MEFDPKLRENMSPQHQHHPMMLSENNILKPLQTTTPLSSSSSKGYYLQDFHHLDDDDDDQIQVNVSSSSWNPVFGVNAACYDPFDAFPYGCSTNRVDFYECKPFAADHNTGNLGHGHVMDNFQSSVGLLNLRNTISNDVIMMGSDVGYLPSFEFPNLGDEVSCVTAENGYRVLVDSTSSRIRTNWKGRKKTNGVKGQWTMEEDRMLIQLVEQYGVRKWSHIAQMLPGRIGKQCRERWHNHLRPDIKKDTWSEEEDKVLIQAHIEIGNKWAEIAKRLPGRTENSIKNHWNATKRRQFSKRKCRSKYPRGSILQEYIKSLNLDSTAAAAARSHEKASDGAAVKAADNKSSSIKQPQGLEIGPSTDRLVPEYEYDEVHEFSFDEKLLQESCSIESLLDQIPS…
Gossypium tomentosum|Gotom.A12G311200	42.8	Malvaceae	AGGGTTTTACATGTGTTCATGAAAAATAATTACAAATGTTACATTATTTTTGAAATCCAAGTCTTCAATATTTGTATTATGACTTGAAAACCAGTTGTTAGAATGTTAGTGCCTTCAAAGCTAACACATCTAAGCTTTTGTCTTTCCTTTCTGTCATATGGTATTTAAACTTGTTCTTAGTTAATAGGAATGACAATAATGTAAATTAAAGCAGGTAATGTAAGAGTTTAAGACGAATGGGATGCGTTAGTATTGAGTCCGAGTCTATGTCTGACCGTCATCAAGTATTTAATACAGCTATTAATTTGCATCTATTTTTTGTAATGAGAATTAACAATATGGCCTTAATTGCGTTTTTGGATGTTTTCAACTCCTAAATTAAATTCTAGTTCATTGTCT…	MAKRYFTLVLVLIASSMEFDPKLRENMSPQHQHHPMMLSENNILKPLQTTTPLSSSSSKGYYLQDFHHLDDDDDDQIQVNVSSSSWNPVFGVNAACYDPFDAFPYGCSTNRVDFYECKPFAADHNTGNLGHGHVMDKFQSSVGLLNLRNTISNDVIMMGSDVGYLPSFEFPNLGDEVSCVTAENGYRVLVDSTSSRIRTNWKGRKKTNGVKGQWTMEEDRMLIQLVEQYGVRKWSHIAQMLPGRIGKQCRERWHNHLRPDIKKDTWSEEEDKVLIQAHIEIGNKWAEIAKRLPGRTENSIKNHWNATKRRQFSKRKCRSKYPRGSILQEYIKSLNLDSTAAAAARSHEKASDGAAVKAADNKSSSIKQPQVLEIGPSTDRLVPEYEYDEVHEFSFDEKL…
Panicum hallii|Pahal.I01404	31.9	Poaceae	CAAATAGGGATCGTCGATAGATCGACCAAAAATTTAATAAAATAAATTAAGATAGTATTATATGTAATTATGATTATGGTACGCACTTGCGTCCCGACATCCAAACGGTTTGGCTTCTCGTCTCCTCTGTCCTCTCTGCCTCTTCTCGCCGCCGGCCGCCGCCCTAAGCCTCTCCTTTATGCCTCCGTATCGGTGACGCTGCTCCTCTCCTCCGGGCGCCTGACGCTCACTGCGATCCGCAGCCGTAGCCGCCGGCGGTGGCGGCAAAGACTTGAGCCCAGGTTTGCTCGTTTCTGTCACTCTATCCGATCAGATTGGTGCATGTGGGGCTCGATTAACTCCGGAGTTCACGGGCTAAGAAACGTTCCTTCTGTAACCACATGATCAGGCAAGCGCAAT…	MDFSCFQPNAGICNYLPFDSYMQQNGHYDFHPVDHPFEAIGDYISGGSMVPPATFNDLGHQYFEEREIKKPIFNHASSIGHRFGPQLPLLTPKTEVSHLIESGLGSYKAYEMSDRFVPRKKTSSNSVKKPNVVKGQWTPEEDRKLVKLVEQFGLRKWSYIAQMLPGRVGKQCRERWHNHLRPNIKKEIWSEEEDMVLIQAHKEVGNKWAEIAKRLPGRTENSIKNHWNATKRRQFARRRSRTSSKGPKSGTLLQNYIKGLGIGPSKNVAPPAQPTLPPSSPATPGAKSAKVHEMLEHSPSDILDSQGMLAVHEYNCSETDQSCEELLAPICCGDFSVVDMCEGLFDTTEDASCFQVFTVGDDVDMSYIFNHLDHAIKVDPEIDMEMMWDDDALVCGEPD…
Acorus americanus|Acora.02G014000	34.2	Acoraceae	TTTAAGGTGGTGAAAATTTATATTTAAGTCCCTCATGTCGGTTGTTCAAAAATGCAGAAAATGCCATCGCCCAATTATGCGAAGGTAACAATATACTGGAGTAATAACAGTGTACTGAAAATACTTAACAATATATTGAGGAGTGTTAACAATGTACTAAAATAATTGACTGAAACATTTTCAGTATTTTTAAACAACATCCGACTGAAAAAATTTAAAGATAATTTTTCATCACCTTGAGTACCTACAAAAACTTGAAAAAATTCTACACCCTAAAAAATAATAGATGAGTGACTACAAAAATCTCTAATTAATTTTTCCAAACTTACTTATACTGTTTCTCCCACAAAATCATATAAGAATAAAGAAATATTTAAATTATCTCTTCACATATCTTAT…	MDFSGSLQSMSPMDVDFKPQKTFNHFENCLPTPFTDAFEALIDGISNGSINLASDPSNVELVAFGAVPEEVSCVTGEVNGETKSVVSTTMRKGKNKKTNVVKGQWTYEEDRLLINLVEQHGLRRWSHIAQMLKGRIGKQCRERWHNHLRPNIKKENWSEEEDRVLIKAHSEIGNKWAEIAKSLPGRTENSIKNHWNATKRRQFSRRRSRAASKFPKPCSLLESYIKSLGPISSGPSKTRPTNPKTKPGPPPPPPAVKVEDPTDRLVPTYDLKEISDFLLVDDGPGYGPGYGLGYGPGCYFFDAASSEMEMEMPLPSDVEILMPCESVKREIDLLEMITQGNINNNSNNNNNNNNNNSFNSGF
Glycine max|GlymaFiskIII.17G086100	41	Fabaceae	ATTACAAAAAATTCATTATTTTCCTAAAATTTTATTTATTTTAAATAAAATTATTTTTAATTTATTTTATGAAAAATGTGATATTACACCTTCACCGAATGAGAAGAAGATTCACAAAAAAAAATAAAAATTCATTGTATTTGAATTAGTCTATTTTTGCATTAAAATAAGCTCCAATTAAGATTATATTTAAAATTTCTTTAAAAAAATCCTAAAAATTAATTTAATCTAAGCATGTACATAGTCTTTAATCATCAAGCCAGCTAAAGAGTGGAAAAGGTAATAGTAGCATGCACGAACGAAACACTAAATTCAAATTATCAAGCTAACTGTGGAGTGAAAGTGCTCCCCTATTTGCAAGCCATCCAATGTGGCCATAAATTACTATAATTAGTCTTT…	MDNIETNLTENYASESKPMHLQENYLKPSMEDQLPFGTPSTQGFLQDSHHIDHLQFHVNGSSSSNPIFGVQTPNFDPFDHNVTCESAPPDFEAYECKLFAESNGSGHAHLMDNFQYVGYSLNLPRTNQLDLMVANQSYVPFNALETKPLNFVVPDEVSCISPPNYYKRVGLNKNLRESPSTRITFKARKKSNIVKGQWTSDEDRLLIQLVEQYGLRKWSHIAQALPGRIGKQCRERWHNHLRPDIKKDIWTEEEDKILIQAHAEIGNKWAEIAKKLPGRTENSIKNHWNATKRRQYSKRKCRSKYPRGSLLQEYIKSLNLDKNPPIDYRKKSDKNANAKTNNNGKAAAQPQCADQFCPNGQIVPRYDFNEVPDFSLDDNLFEEGCSIDSLLDDMQSAST…
Ananas comosus|Aco020311	31.6	Bromeliaceae	CTGCCTTGCTCACCAAGCGCCTCGCATGAGGAGTGCATATTTGGGCCCTTCATCCAAATAAACAACACAACAGGCACTATGAATCAACTATTTAAGCATTAATTTCTAAGAGAATGATGTGGTCGAGTAAATTGCAATCAATAGAGGACGTTACTACGTATGTGGAAGGAAATTACTTTAATTAATAGCAACATTAATATGATATTAAGTAAGTAGTAAAAGATTTTAAAAGCATAGATATATAGTTATACAGATTCACGTATAGCATGAAACAAGACGACAGACTTAATGCCAGTTGAAAGTAAGTAGTTTGTTAGGACAGAGGGGCTCTCGCGAGGCACGTTTCGTAGGATGCTTTGAATGTCTTAATTGCAGTCCACTATTTCCTTTGGAGGAGTT…	MDFGNFKPNIGDHPPFEMCYGNCIGQEFEHSVHNPFDVAVSGYSYPCTSFHDYIRPNIATSQSLPDMFNGGFSSYAGGILHYPQGAMSINHHQMEIADHIHRSVVHNKMSFAPPCEHSRSEAGSSRAFGRLDMGSKYTSAGKKPTAAKIQKNADVVKGQWTLEEDRLLINLVEQYGVRRWSQIAQMLPGRIGKQCRERWHNHLRPNIKKDTWSEEEDRILIQAHTEVGNKWAEIAKRLPGRTENAIKNHWNATKRRQFTRKRTRSSKNPRSCTLLQNYIKSLGQISTSTPKTANEEAAVQQKSTAEKSKIKMECPPVNCSSSRMAAAHMRVDGHLFEDHLVPTCDDAHGFGPGHDVLMHLMFLDGPKELNERYDVEMMGHHRMYVNQRLEYYKGVEMEM…
Cinnamomum kanehirae|CKAN_02017700	33.9	Lauraceae	TTGAAAATGGTGCAGGTATTGTATTAATAGAAAAAGGAAGGGAAAGACCCCATACAAATACAATCAATCAATATGAATTAGCCTCCCTCAACTGCAACATCCAAGGGAGGACAGCTCTCAAAATGAAAGGAAAACGATAGAATTTACAAGCTCACAATTCAAGATTGTAATATCAAGATATTTACCTGAACTTAATTTTTTTGATAATGCTGCCATACTTTTGAGGATATTGAAAATATTGTAAGAGAATTGTGCAACATCACACCAAAATGGACAAAAATCATTAAAAAAAGAAAAAAATTCCTATACTATTCATTGCAATTACTCAAAAAATAACGTATTTTCTACAAAATCCTGTTAAATATATTTTGTGGAAAAAGAACTTAAGCTTTTTTCAAC…	MEIDTIYQEGSPLGSALNLNNYLKPVQRGAFSLGACHSNGFQEYYNLDQFLDEGLLSDSKLGGPPSSLFDSLQALANGWKSTFDTGVCMNAVDDGRNRMDVGIFQSRNAVNYMVRAIAGAGNEQEHGHEFSFKGIEHMNSIFHDEMSFVNGAKKLYGEEGVKKNLKTLKRNEKLRKKSNQIKGQWTIEEDRLLLHLVDKYGIRKWSHIAQMLRGRIGKQCRERWHNHLRPNIKKDTWSEEEDMILIQAHKEIGNKWAEIGKRLPGRTENSIKNHWNATKRSQLSRRRCRSSKYPKPSSLLQNYIKSITSSSMENLEDTYKNPTASTTMTNSDHSRPETSDSSGSDQLVPDFDFSNVPNVPLDANIWTETCDIGYLVDEMMIMMPYAGIVGEGFMEIDMP…
Glycine soja|GlysoPI483463.05G034500	40.8	Fabaceae	AACTGCATTTCAAGTGACCTAGATTTATTTCCCCTTCATCAAGTTAGAAAAAGGTTCACAAACAAAATTTTCATTGTATATTTGAATCAGTTTATTTTGCATTAAAATAAGTTCCAATTAAAACATTAGAGAAAGTTTTTTCTTTAAATAATCCTAAAAATTAATCTATTCCAAACATGTACGTAGTCTTTAATCATCAAGCCAGCAAAAGAGTGGAAAAGGTAATATTAGTATGCACGAATTGAACAGAAAATTAAGATTATCAAGCTAATAGTGGACTGAAATCAAGTGCTCCCCTATTTACAAGCCATCCAATGTGGCCATAAATTACTATAATTAGTCTTTCCTCCTGAGTGAAGGTTATGCATTGACTGAAGTAAATGATATTTAAAATTAGTA…	MDLHENYLKPSMEDQLPFGTPSTQGFLQDFHHIDHQFHVNGSSSSNPIFGVQTPNFDPFDQNVTCESAPPDFEAYECKPLAESNGIGHAHLMDNFQYVGYSLNLPRTNQLDLMVANQSYMTFNALETKPLNFVVPDEVSCISPPNYYKRVGLNKNLRESPSTRRTFKARKKSNIVKGQWTSDEDRLLIQLVEQFGVRKWSHIAQALPGRIGKQCRERWHNHLRPDIKKDTWTEEEDKILIQAHAEIGNKWAEIAKKLPGRTENSIKNHWNATKRRQCSKRKCRSKYPRGSLLQEYIKSLNLDKNPPIDYRKKSAKNANANTNSNGKAAAQPQCSDQFCLNSQMVPRYDFNEVPDFCLDDNLFEEGCSIDSLLDDMQSASTMDEKGFDEKIMQCAPTMEG…
Setaria italica|Seita.9G054400	28.5	Poaceae	TCATCAATTGGAATATTGGATTGAAAGTGGAATCTTTTGTAGTCCTATTTTGTACTGAAGTTTTAGATCTAAAGTTATAACTAGGACTGCAAAATAATACTAGGACTAGGATCGATCAAAAGTTAATTCATGATCATGCTAATTCCATTGCTCACAGTAAGGCAAGAAAGAATTATAAGTGCTACAAAAATCAGAAACCAAAATGTGACACAAGTAATATCCGATTATTTCTAATGAGGAAATGGAAGGTACAAATGAACCAAATCTTTGCTTGGTGTTTATTTTGGTGTGTTACATGGTATTTTAACTACTGTATTATACTATTAAACATGTGATTTTAAGCATATTCTCAATTTGAACTTTTTATGAACTTTTGCAATTTCTCTATATATGACGACA…	MVPPATFNDLGHHQYFAEREIKKPIFGHASSIDHRVGFQLPMLTPKSEVSHLIESGLGSYKAYEMSDRFVPRKKTSSYSLKKANIVKGQWTSEEDRELVKLVEQFGLRKWSYIAQMLPGRVGKQCRERWHNHLRPNIKKDIWSDEEDMVLIQAHKEVGNKWAEIAKRLPGRTENSIKNHWNATKRRQFARRRSRSSSKGPRSSTLLQNYIKGLGIGPSKNAAPLAQHTLLPPPSPATPGAKSATINEMLEHSPSDILDPQGMLISAHEHSRCSETQSCEELLAPVCYDDFSVVDMCDGLFDTKEDAFQAVYAVDDDIDMNYIFNHLDHTIKVDPEISDMEMMWDDDVLGCVEPAGSAEVETVHVKEEMDLMEMVAATQQNYGEAEKSQISD
Setaria viridis|Sevir.9G053900	29.9	Poaceae	CCGCGCCGCCGCCGCGGCTGTTCGCCGGCACCTCCACAAATGCAACCACGCGCGCGGGCGCCGCTTGCAGCTCCCCTCCGCAGCTTCAGAGCTCTGGTGTTTCTCTGCCCCCTAATTTCCCACTCTCTCTAATTTCTATTCGATTCATCAATTGGAATATTGGATTGAAAGTGGAATCTTTTGTAGTCCTATTTTGTACTGAAGTTTTAGATCTAAAGTTATAACTAGGACTTCAAAATAACACTAGGACTAGGATCGATCAAAAGTTAATTCATGATCATGCTAATTCCATTGCTCACAATAAGGCAAGAAAGAATTATAAGTGCTACAAAAATCAGAAACCAAAATGTGACACAAGTAATATCCGATTATTTCTAATGAGGAAATGGAAGGTACAAA…	MDFSCFQTHTGICICLPFDSYMQQNGNYELDPDDHPFEATGDYISVGSMVPPATFNDLGHHQYFAEREIKKPIFGHASSIDHRVGFQLPMLTPKSEVSHLIESGLGSYKAYEMSDRFVPRKKTSSYSLKKANIVKGQWTSEEDRELVKLVEQFGLRKWSYIAQMLPGRVGKQCRERWHNHLRPNIKKDMWSDEEDMVLIQAHKEVGNKWAEIAKRLPGRTENSIKNHWNATKRRQFARRRSRSSSKGPRSSTLLQNYIKGLGIGPSKNAAPLAQHTLLPPPSPLAQHTLLPPPSPATPGAKSATINEMLEHSPSDILDPQGMLISAHEYSRCSETQSCEELLAPVCYDDFSVVDMCDGLFDTKEDAFQAVYAVDDDIDMNYIFNHLDHTIKVDPEISDM…
Oryza sativa|OsKitaake06g045100	32	Poaceae	GATCGGTTTGGCACAAAGTGGAACCACAAATTAAAATAGGTTTGGATCATACCTTGATCTCCCGGAGTTCCCATTTCTCTGTTGTTTGTTCTTCTTTCTTTTCCTCTTGTTTGGAAGCACAGAGAGGAGAGAGATGTGCTATGGCTCTTCCCTGTGTTCTCAGTGGGTTGCTAGATCGGGTAGCGAGAGAAATCTCTTAGGGTTTAATACTTAGGTGTTGATTTCTATTTATAGCCACTGCACACAGGGGGAACCGACACTAGTGGAGGCGGTAAATCCCCCGATCAGGGACTTTCTTGAAGGGGCGATCACTGTAGCGATTGCCCTAAAAAATCTTTCTTGCCGACTTTGGTTTAGCCGCAAGATCACATTTGTGTTCACAGTAACACAAGCTAGTGC…	MDFSCLQPHSGGCDDMPFDSYVQQNGHQELHLVDHPFNNVTDGHEYYSPSAGGSFLPFATYYDLGHEYYPQGGEKDAVVVDRASPTIRKASPHLPLFTPKSEVSHLIGGGVVGSYKAFEMNSRLIRRKRASGKSLKKANVVKGQWTLEEDRKLVKLVEQFGLRKWSHIAQILPGRVGKQCRERWHNHLRPNIKKDTWSEEEDIVLIQTHKEVGNKWAEIAKHLPGRTENSIKNHWNATKRRQFARRRSRASSKNPKSGTLLQNYIKSLGIGPIKSSVRQAPPESTAVSSSSPASTQKLAEVNGKIRPDSNPSNQMVTQGILTMDENSYIQTNSCEELLVSTYDDLCLDMCDHLFETKDEMPYQVYNIDDDVDMNYIFNHIDYANKIGHEIDMEMAWDDD…
Coffea arabica|evm.TU.Scaffold_105.198	39.7	Rubiaceae	TTTTGTGAAAATAATTGGTAATGGTTGATTTTGTTTTAGTGGGATAACACATCTATAGATCTACATTTGTTGATTCAGTTAGGATTTGATTAAGAAAAAAAAAACTTTATTAGTTACTAAGCACTATATTTAGTCCAAAATATTTCAATAAGTGGTATTGATGATATACAGGATTTAAAGGGCAAGAAGAAAATAGGTAGATTTGGACATTAAGTTGTCTGGTGTGGCATAAGTTTTAGCACTTAACATCCATGGCATGCATGTTCTAGTACAATACAAAATCCGGATAGAATTGCAGGAATATTACTTGTCCCATCAAATATCAATTCATGGTTAAGATGCAATGCCATAAATATCTTAATTAGTCAGTCAACACACATTAATTAAGTTTAAATTACA…	MPANFLKPDIDQDFCLDNCQSKGFLQDFQHLDHFSFTGSSFNPDLGIHTTGFDPFDPFFNGSSMIDFNYLEFNPFEENDNNNGKLVTQNFEGGGGLLKHTVKETPLSDENSSDHKLFPLTLPEVKPLNFCVQDESSCITAESVYYKEAGTKRNNNRFSNIALSSATKKQGRGRKKSKSAKGQWTIEEDRLLVHLVEKFGVRKWSHIAQVLKGRIGKQCRERWHNHLRPDIKKDIWTEEEDRILIEAHAEIGNKWAEIAKKLPGRTENSIKNHWNATKRRQFSRRKCRTKWPKPSSLLQNYIKSLNFEKSSSGRKNASTTDTPTIGDHKQNSNPNEEAMELNSDPLVPDYDFSEVPEFALDDNLFERTSINNLNSEIHNASPILDDKGFCMEIPYDVPPP…
Betula platyphylla|BPChr08G01404	43.8	Betulaceae	ATGAATAGTTAATTTTTGACATCAAGTCAGAGAGAAGGAGAAAGAGAGGTTATTTTTATTTTTATTTTTTGAATTGGAGAGAGAGGTTATTGATCTTGAGTTATAAGCACTAAAAGTTGAAAATATATTGATTTTACCGATAGATTTTTTCTTTGCACTATGGTATTCCAAAATCAAACTCTATTTTCCGATGAAATTTATTTGGTCAAAACTAAAGTAATTAAATGAAGCAGAACAACTCTTGTAGTTAATTTATATAATTTCCGTTTGACCCAATTTCTAACAACAACCTTTTCAAATGCATCCAGGTTTAAAATTCTCAGCAAATGGCACATTAATCTCTCTCATTTATATCAAATAAAGGCAAGATCAACATGGTCATAAGTATATTCAACTCTA…	MELDTKLTENLASQPMLLSDNYLMKPYMKDGFSFEAPSSKGFLQDFHHPGQFQTNGSSSNPIFGVPQTQCYDSLINNFTYGCSSDFDIYECKPFADNCGRGHVMDNFQSAGYLNLSQRNPIDIMAFTTNCQDIKPVNFVVPDELSSITAENGYYKRVSMNKNRALQTTIRTYKGRRKCNVVKGQWTIEEDRLLIQLVQQYGVRKWSHVAQMLPGRIGKQCRERWHNHLRPDIKKETWSEEEDKVLIEVHAEIGNKWAEIAKRLPGRTENSIKNHWNATKRRQYSKRKCRSKYPKGSLLQDYIKSLNLDSNAPQNQRKTKAPPSDDHHDHDHEQAPQTEEVSDYDFMSEVPDFCFDGNMFQESCSIDSLLDEMACGDPVVGENHFEMDIQIPVDMTLVKE…
Phaseolus lunatus|Pl03G0000286400.v1	41.2	Fabaceae	GAAGGAGGTTTAACTGTTGAGAGTGTTAACTCAATTAACCATATGTTAGGTGTAGTAAGTTAAGTAGATTTATTTCCCAAAAAGATTCACTAATAAAATGTTCATTCTATATTTGAATTAGTTTATTTTGGATTAAAATAAGTTTCGATTAAAAAATTATAGAAAACTTTCTTTAAGAAATCCTAAAAGATAATCAGATATGAGCATGCACTTAGTCTTTAACATCAGACTAGTAAATGAATGGAAAGGTTAGAATATCAAGCTATCAGTATCAATGGAGTGAAAGTGCTCCCTTATTTACAGGCCATTCAATTTGACCTAATTAGTCTTTCATTCTGAGTGAAGGTTATGCATTGACCCAAGTAAATGACATGTTAAATTAGGTATTCATGCTTCAGA…	MHVQENCLKPSMGDELHFGAPSSQGFLQDFHHIDQFSVNNGSSSNPIFGVHTPNFDPFDHNVNCESAPPDFEVFECKPIAESNGSAHAHLMHNFQYVGYSLNLPRTNQMDMVVANQRYLPFNALETKPLNFVVPDEVSCISPPNYYKRVGLNKNLRESPTTRRTFKAGKKSNIVKGQWTSDEDRLLIQLVDQYGVRKWSHIAQALPGRIGKQCRERWHNHLRPDIKKDIWTEEEDRILIQAHVEIGNKWAEIAKKLTGRTENSIKNHWNATKRRQYSKRKCRSKYPRGSLLQEYIKSLNLDQNPPMDYRKKSAKNGKAKTNNNGKAAAQLLCVDQFCPNGHLVPKYDFNEVPDFCLDNNLFEEGCSIDSLLDNIQSAPTMEGKQSHQGGIMQRVNVDEH…
Quercus rubra|Qurub.10G188300	41.2	Fagaceae	TAAGATGATCACAGCATTAGATATTAACTGGTCCCATATGTAGTAAGTAAAAACAAAGGTCATGATCATCATAAATATGTTCAACCATTTGACTACATGCTGCAAAAAAGTTACCTTCACTCAAAATTAATTTGTGGAGTAAATATTCTTTTTATTTAATAAGAAGCCCTTAAACATATTCTTAAATTCAACTAGATTTTTTTTTTTTTTAAAGATAATTACAACATGCTGCTAATCCCGTAACTCGAACCATTTCCCTTCTAAATCCCCAAACACTTTGTACATAAGAAGATGTTAATTCAGTTACAAGGCCCTTAGCAAAAGACAACTAGTTAAATCCTCATCAAATTGCATATTAACTTTTTTCCTGTAAATAGTAAGTAAAAACAAGGTCAAGAT…	MELDTKFRENLASQPILLSDNYLESYMKDDFSFEAPSSKGFLQEIHHLDQFQTNGSSLNPIFGVQTQWTSTDFDIYECKPFMDNGGHSHVMDNFQSGGYLNLPQRNPIDIMGSDRSHMVFTTCQDIIKPLNFVVPDEVSSITAENGYYKKIATNKNRAFPTTKKPQKGRKKSNVVKGQWTVEEDRLLIQLVKQYGVRKWSYIAQMLPGRIGKQCRERWHNHLRPDIKKDTWSDEEDKVLIEAHAEIGNKWAEIAKRLPGRTENSIKNHWNATKRRQYSKRKCRSKYPRGSLLQEYIKGLNLDPSNMMQNRRKTSSSNATANNTTIKTPTQLPQSTDQFCPNARLVPNYDFNEVPDFCFDENMFQESCSIDSLLDDIPNNAPIMDENNFNDQMPCGPLVD…
Olea europaea|Oeu035998.1	38.7	Oleaceae	CTAGAAGTTACTATCCAAAACATTGTTTTTCCCAAATATGGTTGTCAAACAAAAATAGAATCAGCCACAAACCATCTTATTCCTCCCCTAGGAATCATAGTTGTTTAGAAGGATTGAGATATCAAAGAAAATTTTCTTGCACTGCTGATTGGTGCCTGGAAACTTGGATTTCTTGAGCTTTCCGAGTCATTATACATCCATAGTTCCAGATGGAAACTTTTTTAACCCTTAAACTGCTATGATATCGATCTTCTAAACATTATAGTTCGTGATGAGATATCTTGCGAAATTTATGATAACGGCATACTTTGGGTAGGAATTTGAAATAATACTAGTATATGATACCAACACCAGTGCAATTTTCCAAATTAAATGTTCTCAAAGATACTTATATCAAAA…	MESKCGNDHATPRPIALFNSNMKLKLEEDSSMHMNFSSKGHLQESQYFDLFSLTGSSFNPNLGSQVNGFDPFDLFTLVSPSTDFDSYDFKPFEDNDVGIMHNFQGGGFLNFQERKYPSTGIETSDRNILSLNCHDSDLLNFVPDESSCVTAGNGNKNGFSNKWKNNSGDSSNTIIEDESASAKSSGRAWKKSKSAKGQWTGEEDRLLIHLVEKFGVRKWSHIAQMLKGRIGKQCRERWHNHLRPDIKKDVWTEEEDRILIDAHAELGNKWAEIAKRLPGRTENSIKNHWNATKRRQFSRRKCRTKWPRPSSLLQNYIKSLNSEKGLASSPTATNVGIIYNANASMKKLEKPDFMDLCVPDYDFGEVPEFTLDDKLFEGSSIDSFMEDISGVSPKIDEKC…
Phaseolus vulgaris|Phvul.003G201300	41.4	Fabaceae	GTTAACTCAATTAACTCTATGTTAGGTGCAGTAAATTATATGCACAAATATCATTAAAACTAGATGCATCTCAAGTTAAGTAGATTTATTTCCCAAAAAGATTCACTAATAAAATGTTCATTCTATATTTGAATTAGTTTATTTTGGATTGAAATAAGTTTCGATTAAAAAATTATAGAAAGTTTTCTTTAAGAAATCCTAAAAAATAATCAGATATGAGCATGTACTTCGTCTTTAACATCAGACTATAGTAAATGAATGGAAAGGTTAGAATATCAAGCTATCAGTATCAGTGGAGTGAAAGTGCTCCCTTATTTAGAGGCCATTCAATTTGACCTAATTAGGTTTTCATCCTGAGTGAAGGTTATGCATTGACCCAAGTAAATGACATGTTAAATT…	MHVQENCLKPSMGDELPFGAPSSQGFLQDYHHIDQFPVNNGSSSNPIFGVHTPNFDPFDHNVNCESAPPDFEVFECKPIAESNGSAHAHLMHNFQYVGYSLNLPRTNQMDMVVANQRYLPFNALETKPLNFVVPDEVSCISPPNYYKRVGLNKNLRESPTTRRTFKARKKSNIVKGQWTSDEDRLLIQLVDQYGVRKWSHIAQALPGRIGKQCRERWHNHLRPDIKKDIWTEEEDKILIEAHAEIGNKWAEIAKKLTGRTENSIKNHWNATKRRQYSKRKCRSKYPRGSLLQEYIKSLNLDQNPPMDYRKKSAKNGNAKTNNNGKAAAQLLCVDQFCPNGQLVPKYDFNEVPDFCLDDNLFEEGCSIDSLLDNIQSASTMEGKQSHQGGIMQRVHVDEH…
Salix purpurea|Sapur.005G095000	41.9	Salicaceae	AAAATATTTTTTGTTCAGAACTGTATCAAAATAATATTTTTATTTTATTTTTTAGAAATTATTTTTGACATCAATGTATGAAATATTTTTAAAAAAAACACCAAAAAATAATTTAAAGAAAAAACTAAAATAATTTTAAATATTTTCAAAAATGTTTTTCAAGTGATTTCTCGTACACTAGTATGGCATAATTTTATTTGCTCCACTTTCAATCCTAGTCAAAAATATCTTTAATGAATATACTAATTCCTCTTATTATAAAAATTGAAGGATGAGTTTAGCAATTTTTCTTTCAAAATGCTAGCTAGTTAATAGACTGTTAGATGGACCGCAAAGAACTGTAAGAATCTCCCAAGAGATCACCTCGCGAGTTCACTTCTTAATGTATTATAACTCTTC…	MFSPDSYLNRPYMKDVFPCETPSARSFLQDLNHLDQVHANRSLFGVQTGSNFDSLDAFPYRLSATTHLYEYDYKPYTNNSNGLYVRENFQGGGGCWNLPQKNLIEITGPNQSHMSLNLKEIKPMNIEVLDGTPCVTTKDDCYTKGGLYKNGAMLPLTRRSGKTPTKEPNNAVKGQWTAEEDSLLIRLVDEFGIRKWSHIAQILPGRIGKQCRERWHNHLRPDIKKDIWSEEEDRVLIQAHKEIGNKWAEIAKSLPGRTENSIKNHWNATKRRQNCTSKRKSRSKYPKGSLLQEYIKSLNLDSIPKVKRRQRRRRTDKHPDAKLVSGTTMKEPSAEQTRQDLDLCENNDGPVLDYDFDEIPDFDFDETIFQDGCSIDSLLDEISCDPAVMEVPRADEIPF…
Medicago truncatula|Medtr4g105660	40.5	Fabaceae	TCTTACAACCACATCGTTAAGATATCATATCTATCACATCATATTGTCTGTTCCTTTGTTCCTCAACGTGTCAATGGAGCGAATTGATATCTATATATGAAACAATTTCCTAAAAACAAATTAAGAAAAAATAAACAAGTGGTTTTATAGATAATATAATGTAACCGGTAAATAGAAGTTAATTTAACTTTTTTTTTTAAAAGGAATTTTTAACTTATTTATTTATTTATTTCAACCTTGAACATAAAATTACTCGCATCGTGCAATGTGTGAGTCACAATCTAGTTCTCTTTAATTTATTCTGTTATAGTTGTAAGCACAAACTGAACTACCAAGTTAGAATATCAAATCAGCATAGGGTGAGTTGCTGCCCAATTTGCAAGCCATCAAATTTGACCT…	MHLQENYLKPRQKDELNPFSAHSCHGNFLQDFQHIEQFHHMHGSSSSNQVFGDQTQNFDLFGNAECANTDFDVYDGKSFAENNSGSEHAHNLIDNFQYDGYSLNIPRRNQLDLMVENHSYFSFNNPSETKSLSYVVPEDEVSSIAPTNYYQRAGLNINNSLLSPTTRRAFKAKKKTIIVKGQWTVEEDRLLSQMVEQYGIRKWSHIALKLPGRIGKQCRERWHNHLRPDIKKDVWTDEEDKILIQAHTEIGNKWAEIAKRLPGRTENAIKNHWNATKRRQYSKRTCRSKYPRGTLLQEYIKSLNLDQNPPRDFRKRSSAKAKKKITCSTSKAATQIPQPHIANQFFPNDRSVPNYEFNDFSLDDNLFEEGCGIDSLLDDMSSVPTMDEKECDKEGMQVV…
Asparagus officinalis|evm.TU.AsparagusV1_01.600	33.6	Liliaceae	TTGCATTAATGATGCTGGACTAGAGCAACAACATCATCATGCTTGGCATTAATGATGCTGGACTAACCTATGTAAACTTAATTTGAGAAGAAAATAGGTTTACGATCCTTTTCTTCCTCTTTATTCGACTGTTAAAAGTGAACAAGTGATACAAATGATACACACGGAAAATATTTTTGGGATTTAGATATTTCTCTTTACTAGTAGTACAGTATCTGAAATGTTACAGCAAAGTAAATAATAAATAGAATTTACAGACTGTGGTCTATTCCTTTCTTTGTATAGCCAATGCGAATAATATTTTATCTGTAATTATCAAAGAACACCATCTTCATAGAGGGCACACATGAGTTTCAACTCTCAAGTCTATATTTCATAGTTTGTTATTGTTATAGTTTG…	MDFDCLKNQLSFESSANSNEFQDLQRYFNDSKDDDLANSSYEFPSLDDICFKPDMMSNNREILPLDDFTDLESTNMMLIRSFQHSNMDLSIYDDDDQHRSPYVMESQPHLSRNSSSSSSSSVVVHDVQPLSAFPPSDGFTFQISNSSSLLYHKEANMNIKFPTKKRTQKKSNVVRGQWTLEEDRLLARLVEEYGLGKWSHIAQFLSGRIGKQCRERWHNHLRPNIKKDTWSEEEDKILIQAHIELGNKWAEIAKRLPGRTENSIKNHWNATKRRQFSRKRTRISKYPKSGTPLQNYIKSLGMNPVTQPLLGSIDQNSSFEENFIQNDRFVPACSFNDVSGYFHGESIADHFGGNERFEMEMDWNSGVTAIKAKVEMDLVEMMALKNNDSGSSF
Castanea dentata|Caden.04G168900	52	Fagaceae	CCATATGTAGCAAGTAAAAACATAAGTAAGATGATCACAGCATTAGATATTAACTAGTCCCATATGTAGCAAGTAAAAACAAAGGTCATGATCATCATAAATATGTTCAACTATTTGACTAATGCTGCAAAAAAGTTACCTTCGCTCAAAATTAATTTGTGGAGTAAATATACTTTTTATTAAATAAGAAGCCCTTAAACATATTCTTAAATTCAACTAGTTTTTTTGTTTTTTAAGATAATTACAATATGCTGCTAACCGGCCCACAGCTTGAACTTTTTCTCTCCAAGCATTTTATACATGAGAATGTGTCAATTCAGTTACAAGACTCTTGGCCAATTAGATAACCCTTGTCAAATTGCATATTAATTTTTCGCCGCATATAGAAAGTAAAAACAA…	MKDDLSFEAPSSKGFLQSIHHLDQFQINGSSSNPIFGVQTQCTSTDFDIFECKPFMDNGGHGHVMDNFQSGGYLNLPQRNPIDIMGSDRSHMVFTTCQDIIKPLNFVVPDEVSCITAENGYYKKIGMNKNRAFPTTKKPQKVRKKSNVVKGQWTVEEDRHLIQLVKQYGVRKWSYIAQMLPGRIGKQCRERWHNHLRPDIKKDTWSEEEDKVLIQAHAEIGNKWAEIAKRLPGRTENSIKNHWNATKRRQYSKRKCRSKYPRGSLLQEYIKGLNLDPSNMVQNRRKTSSSNATANNTTTKTPTQLSQSTDQFCPNARLVPNYDFNEVPDFCFDENMFQESCSIDSLLDDIPNNAPIMDENNFDDQMPCGPVVNENMLHCAPVVVDENDFDMDIPVDMTP…
Brachypodium distachyon|BdiBd1-1.1G570000	31.7	Poaceae	GGCGGCGGCCGCCGCGTGGAGGCTATTCGCACCGGAGGCCATGGTGGGCGTCGCGCGCAGAGGGTGTTCAACCTCGTCCTCTTTCTCATGCCGTGAGCGCGGCGGCGCCGGTCGATTCGAAACTCGAAACGACCCATCCCCGCGGAGGCCGTCGTCGCCCATGCCGTCGGTTGCTTCCGGCTCCCTCCCGCGCGGACTGCGAGACCGACGCTTCTCGTGGGCGGCGACGTACGTGGAGTGTATTCATAGCAGGTGTGTGCCGCTCTCGTCCTCAGGCCTTTGCCCCTGTTCTTCGCGGTGCGCTTGAGCAGCATTTCTTCGTTTGAAAAACAAGTTTCAGTTTGGTTTTAGGGGTATAAATCTGCTTTAAAAAATTCTGGGAGTAATCCTACCATCCTT…	MDFSCFQPHTGNFDNMPLDFHVQQYGQYELHSVDRSFEPAGGSIIPFASFYHEYYPQGAMNKAAVDASSIIHNSESHLPLLMPKIEVSHLIESGLRSYKTYEMSSRFIPRKKSSSKALKKTNVVKGQWTLEEDRKLVKLVEQFGLRKWSQIAQMLPGRVGKQCRERWHNHLRPNIKKDTWSEEEDMILIQTHKEVGNKWAEIAKRLPGRTENSIKNHWNATKRRQFARRRTRSSSKNPKSGTLLQSYIKSLGIGCSKVIAPLDPKEPPLSPSSPPTPTENLVDVNDNLLESNSSNRIASQGIFSTDDIQTYSCEEILVPMCDDFSDMCDGLFDAKEEAQYQVYNIDDDVDMDSIFKHIDYAIKIDHGIDMDMTWDDNALINIESESSSLVTPIGPAEIK…
Phaseolus acutifolius|Phacu.CVR.003G241500	39.8	Fabaceae	TGAAACGTTTAAACTTAAAAATTAAATAGAAGTTGTTAATGATGGTCAGTTACTTCACAAGACTTTTTCAGGTAAGACTATTTTGTATGGGAATAGAAGGAGGTTCAACTGTTGAGAGTGTTAACTCAATTAACTATATGTTAAGTGCAGTAAATTATATGCACAAATATCATTCTATATTTGAATTAGTTTATTTTGGATTGAAATAAGTTTCGATTAAAAAATTATAGAAAGTTTTCTTTAAGAAATCCTAAAAAATAATCAGATATGAGCATGTACTTAGTCTTTAACATCAGACTATAGTAAATGAATGGTAAGGTTAGAATATCATCAAGCTATCAGTATGAGTGGAGTGAAAGTGCTCCCTTATTTAGAGGCCATTCAATTTGACCTAATTAG…	MDIEANLTENYASQPMHVQENCLKPSMGDELPFGAPSSQGFLQDFHHIDQFPVNNGSSSNPIFGVHTPNFDPFDHNVNCESAPPDFEVFECKPIAESNGSAHAHLMHNFQYVGYSLNLPRTNQMDMVVANQRYLPFNALETKPLNFVVPDEVSCISPPNYDKRVGLNKNLRESPTIRRTFKARKKSNIVKGQWTSDEDRLLIQLVDQYGVRKWSHIAQALPGRIGKQCRERWHNHLRPDIKKDIWTEEEDKILIQAHAEIGNKWAEIAKKLTGRTENSIKNHWNATKRRQYSKRKCRSKYPRGSLLQEYIKSLNLDQNPPMDYRKKSAKNGNAKTNNNGKAAAQLLCVDQFCPNGQLVPKYDFNEVPDFCLDDNLFEEGCSIDSLLDNIRSASTMDDKD…
Prunus persica|Prupe.5G172400	41.4	Rosaceae	GTTTTCTGCTGAAGAAATGCCTTATGATTTCCCTCACCACTCAAACATTGATGAGAAGAACCCTGAGAAAGCTTTCCAGCAACGATGCGCATAATATAATTTCGTCGTCAGCTTGAAGTTTTCCAAATTTTCAGAGTCAAATGCTACATTAAAATTTACCCCAGAAACACATTGTTTCTGTTGGCGATTGCACTATATACAGCATTCTATATAGGAAATTTGAAAGCTTTGACTGAAGATTTCATCTCTTTTGCATTGAAATCAATTGAGATTGAACTGTGGGTTGTAAACTTGATGCAAACTAAACTCATTCATGTCTCTTTTATACCTTTGATTAAGGGTGATATTTCCTAAGTTTCTTTTCTCAAAATTTAATCTATAACAGTTGCTACAAGAAGA…	MMKLYNMKDEFPFEASSSSSKGNYNYLQDFHHLDHQFQVNGSSSNPMFGVQNPCFDPYNDTTYTYEASTTDVKFYECKSLNAETNMGHGQVLDNFQSGSGSLNFPTHTSNPLDHLMGSSHRSATNFLPLDYQDIKPMNFVVPDEVSCINNTDQNGYYKKFGMNGKSRVSTLTRGSTYKGRKKSNVVKGQWTIEEDRLLIQLVEQYGVRKWSHIAQMLPGRIGKQCRERWHNHLRPDIKKDTWSEEEDKILIQAHAEIGNKWAEIAKRLPGRTENSIKNHWNATKRRQYSKRKCRSKYPRGSLLQEYIKSLNLDSTGSSTGRQRKNKSGNNSATSPNNMAPSSTESHTQQTQNNVGFSCANDRLVPNYDFNEDPDFCFDDNMFQEGCSIDSLLDDIPCAP…
Eleusine coracana|ELECO.r07.6BG0499670	32.6	Poaceae	ACGTCCGGACCATAAGGCTTCTTGTGCAAGAATAATTCTTGTCGATCCCGTCCATCGCACTTTGACTCTAAACGAAACGCATCCTAAGACAACTAGTTGTTCAGTTTCCCTCCATCAGCAAGGAAAAGGAGAAGGAAAGTGAAAGGAACAGAGACGAACACCGAGCCTGAGCCTGTATCGGTTTCACCAAAAAAACGAAGGATTGAAAGAAAATCTTTCGCGCAGAGGAACCCCAGTTATTCAGTGTGTTTTAGGATTTTAGCAAATATAGAACAAGGACAGATGTTGACGTATAAGAATGCACAAATTCACGGAAAAGTGGAACGGCAAGATCAACACAAAAGCAGTGGAACGCAGATAAAAAAGAAGATAACTACAGTAAGCACTGAATGAGAAATA…	MATTASRGGTLSRMEVGQALVRKIVQFRELFSDQTAHFVRPNGLYELHHVDHPFEGIGEYTSAGSMIPSATFNDLGQTKRTVTNQVGSYLPLLTPKTEVSHLMECGFGSYKAYEMNGRFATRSRKASSNSLKKAGIVKGQWTPEEDRKLVKLVEQFGLRKWSCIAQILPGRVGKQCRERWHNHLRPNIKKDIWSDEEDMVLIQAHKEVGNKWAEIAKRLPGRTENSIKNHWNATKRRQFARRRSRSSKGPKSGTLLQSYIKSLGIGPTIRNIAAQPVAVQPTLQPPSPAFPRAKTNDGSSEHSPSSVLNTQGMFITNQNNCGETQYSIDELLAPICDEFSVENMCDGLFDANEDVFQVCGIDDDVDMNCIFNQLDYAGKQADSGIDMEMTWDDDAFVDC…
Vitis vinifera|VIT_217s0000g08550	40.3	Vitaceae	TACCTTGACCTGTGTAATTACCAGTAGTAATTGATATCTAATAAAATTAACATGTCTTAATTGTGTTTCTCTAATTAGAACCAACTCTTAATTGCTTACTAAATATTTCATTATACCAAACTCTCTTTCGGTTACAATCCTCCATTCCCTCTTTTAATCTCTATAAATTTTTGGATGTGCTGAAAGTTTATTGGATAATTTTTTTATAATTTATCCTTTTTTTTGTATAAAAAAAAAAAAAAAAGGTTAAGCAGTTAAAAGTTTTAATTAATTTTTATTTAAAATTTGAGAAAATAATAAAAATAATAATTGAAATTGGACAGTAAAGGAAAATAAATTAAAAATAAAAATGCTGATGGGCATGTGGGACAATGGAGAAAGCTGAAGTACTTAGAACTT…	MDFDRKYKENLGSQPMLLPENYLKSYMGDGAFSLEACSSKAFFQDFHHLDHQFPTNASSKTLQFGVQTACLDPFDSFTYGSGMNLDVYELKPYAENVGVMENFQSNNGGGYLLHHHQRAAAADMMGLDRGRVAFNCQEIKPVNFVIPEEVCIAAENSLYKKISMSTAKNGASPAAKKTYKGRKKTHVVKGQWTIEEDRLLIQLVEQYGVRKWSLIAQMLNGRIGKQCRERWHNHLRPNIKKDIWSEEEDKILIQAHAEIGNKWAEIAKRLPGRTENSIKNHWNATKRRQLSRRKCRSKYPRQSTLLQNYIKSLNLDSRTVDYQKNPTANNPMAANNTVLRPPMNRPEISDFCPGDGVVPNFDYEEVPDFSFDANIFQENCSIDSLLNEMSSAPTGDEKG…
Lotus japonicus|Lj1g0015086	42	Fabaceae	TTTACAAATGTTTGGCGGAGCCATACAAGCTACGTCACTAGGGCGGTTTGTATGGAAAAATATTTTTTAGGAGAGGTCTACCTATTTAATGTAATTTCAGAACCTCAAAGAAAAATAATTTTATAGTTATTGGTATTTTCATTCCATCTCATTTTATCCAAATTTGGGAGTAAAAAAAATAAAAATTGATGGTAAGCAGTGAAATGTGATAAATTGGATTCCATCATCTTCCATTCTATTTCATACAATGAAACCAAACGGTGAAATATAATGCCACTCCCTTCCATTTCTTCATATTGCACCCCCTCTCATCTTTCCAGACATAACCTTGCAAACATCTAATTTGGAGACGGGAGTAAATAGTCTTTCATACTAATTATAAAAGCTCTTTAACCGAAA…	MDLETKLRENYVSQPFGVPSSQGIFLHDFHQIDHQFQHGNNGSSSNPIQTPNFDPCGNFNYQCSPVGFDNAYHELKPFVDQNSGSGHAHVMDNFLYGGFGFNLPQRNQLDMMVANQSYFQLNPQEIIKPVNFVVPDEVSGISSVNYSKRDVMNKNNRAYPITRRSYKVRKKSNIVKGQWTAEEDGLLIQLVEQYGLRKWSHIAQILPGRIGKQCRERWHNHLRPDIKKDTWSDEEDKILIQAHSEIGNKWAEIAKRLPGRTENSIKNHWNATKRRQYSKRKCRSKYPRGTLLQEYIKSLNLDKNPPIDYRRRSSANAIAMKNKIGSNSKVASAPQQARPQETDQFCLAPNCDFNEVPDFCFDENLFEEGCSIDSLLMDEKEFEGKMQCVPTMEGKDCDQ…
Sorghum bicolor|SbRio.01G057000	28.9	Poaceae	AGCTGCTGCCTGCTCTGATGATTCCTGCCACCGCTGTACATTCAAGCCTACGTGATCGAATAATTTTGGAAAAAATTTGAACTCTAAACGTGCAAATAAACTCGGACGGAGGGAGTACTAAAAAAAACAAAAATGCTACAATAGCTCAAAGCAAAAAAAAAAGCATTTTTTGGAAGGCCTTGGACCTGGATCCACGCAGGGTTGAGTGAGGCCCATAGTATACATGGATCCACGCAGGGTTGAGGCCCATAGTATACTTGGATTTTCGTGCGCCGTCGGCCCGCTTCACTCTGCGACGCTGGAGCACGGGCATCCCACGATGGAAACGCCCGTCTTGACGAGTTGAGGCCCGGTCCTCTCGGGTCTCGGGCGCTGCCGGAGGAACCAGTGGCAAGACAA…	MDFSCFQPHTGISSYLPFDSYMQQNGRYELHPVDHHPFEVIGDCTSATFNDLGHRFFVEREIKKPTFDHASSVGQRVGSQLPLLTPKTEVSHLMDGGLGSYKAYGMNGRFLPRKKTSLKKANVVVVKGQWTPAEDRKLVKLVEQFGLRKWSYIAQLLPGRVGKQCRERWHNHLRPNIKKDIWSDEEDMVLIQAHKEVGNKWAEIAKRLPGRTENSIKNHWNATKRRQFARRRSRSSKGPKSGTLLQNYIKGLGIAGPSNKTAAAPLPEPTLSPSSLEAPGAKSAKTDEITLEVEHISTSSNIPDSQGILLLPSIHEYNNCSESQSCEDLLAPICDEFSVEMCDGLFDTNEDADAFQVYAMDDDIDMNYIFNYIEHAAIKVDPEIDMEMMMMMMMWDGDD…
Vigna unguiculata|VuCB5-2.03G317100	42.1	Fabaceae	AGGAAAAGCGAGAATTTGTTGTGTTCGTTTTCAACAATTTAGGTGGATGTGAAAACAGGGAAAGGGAGGATATAGCATTCATTCATTCCGCGCACTAACGAGGAGTTATGCGAAGAAAGATCAGTTTTTTACATGAAATTACAATAATAACCTTTTTAACCTATTTTTTTACTTATATTTTTTCATTTATTCTATACTGCAGTTACCTTTTTACTTTTCATATTACTTCATATATATTATATAATTCTTAATTCTTAATTCATTAATATTCAAATAAAGAATGTTGAAAAAAATATATAAATATGCACATATGTTATAATAATAATAATATATTTTATTTTTAATTATTTTTATAGTTAAGGACAAAATGGTAATATTTCATTTTTTATTAATTAAAAC…	MYVQENCLKPSMGDQLPFGASSSQGFLQDFHHIDHFPANNGSSSNPIFGVHTPNFDPFDHNVNCESAPPDFEVFECKPFAESNGSAHAHLMHNFQYVGYSLNLPRTNQMDMVVANQRYLPFGALETKPLNFVAPDEVSCISPPNNYYKKVGLNKNLRESPSTRRTFKARKKSNIVKGQWTSDEDRLLIQLVDQYGVRKWSHIAQALPGRIGKQCRERWHNHLRPDIKKDIWTEEEDKILIQTHAEIGNKWAEIAKKLPGRTENSIKNHWNATKRRQYSKRKCRSKYPRGSLLQEYIKSLNLDQNPPMDYRKKSVKNGNAKTNNNGKAAAQILCGDQFCPNGQLVAKYDFNEVPDFCLDENLFEEGCSIDSLLDDIQSASTMDDKDFDGKQSHHHVHIDE…
Chenopodium quinoa|AUR62030952	38.2	Chenopodiaceae	GCACTAACTCAAATAATGATTTTGCTTCTCGGATTTTGGAAATTGCGAGCTATAAAAGCACTTTAAAGTTTAAACAATGTTTTTTTTTTTTTTTTTGGTGAAGCAAATTAAATATAATTGCACTGTAATTGTAGCTAGTGTTGCTATGTAAGTATGTAACCAAAGAGGCAAAGACCGACCTGAATATGTGTGAAAATTTTATAGGGATGAATTGAAATACGATTATCATAATACTTTAATAATTACGTTGTTCATGATTAACTTATTTTTCTTTGTATTTCTTTAGTTTTGGTATAAAATAGTATTAACAACATTTTTTTATATATCTAATTTTTAGTTACATTTATATTAGTTTTTATTTTATAATTTCTCAAAAAATATTGTTTTTTTTTTTTTTTT…	MDFDAKFREKFSPHPSLFSPQNNHSNPRDDQFSLESALLSKGATNFLQDLHPLENFDLNLDLHGSPNAFYPIHQPNCMESYDNSPFECVPSFDFYETKPFVNHATNNVALVPLIDNLNQNELGHSPMITPINMISPNAQGYNPFYYYDYLGPTNYRPSDEDSCTTPVTTATLVPNRLSTTTVVRKGGREHRKKKSTAVKGQWSKEEDDLLIQLVDRYGVRKWSQIAQLLNRRVGKQCRERWHNHLKPDIKKDEWSEEEDRILIKAHTEIGNKWAEIAKLLPGRTENSIKNHWNATKRRQFSKRKCKSKYPRQSSLLQEYIKGLTLETINAGCRKKPLSYANRPPALEATTESPNDHPTGGSSNSSLGELVQPEYDFSEVPDFNFDAQMFEESSIDSLLD…
Trifolium pratense|Tp57577_TGAC_v2_gene37462	42	Fabaceae	CTTAAACCTTAAAAAACGGCATAGGACATTGGCTCAATGGCTCCAAAATGAGAAGTTGAGATTTGTATTTTGAATATTTCTAGCCATGAAATCATCTTAAAAGTTTTCACTTCTATGATCATATATGTTGAAGTTCAAAGCTATGTCAAATAACATGATTTGACTCTTTCACCTTAAAAACAAACATTGAATGAAACAAAAATACTTTGAAATTAAAACAAATGAAAAGATAAATAAGTGATTTTAAAGATAATATAAATTTTAACTTATTCTTTTTCACTCTCACTTCTATAAACATATATTATTCTTACTCGCACCATACAGCCGTGTGGGCGGGTCACGCATTTGTTCTCTATAATTTATTTTGTCGTTGATGTAAACACAAATTGAACTATGCCA…	MFPSIPVTLNSLMVLETNLRENYASQSQPIHLQENYLKPRMKDELIPFGAHSTQGSFLQDFHHIDQFHVHGSSSSNQVFGVQTQNFDPFGNAECANTDFEVYDGKPFGENNINGSEHAQLIENFQYDGYSLNIPRRNHLDLMVENHSYFPFNNPSETKPLNYVVPDDEVSSIAPTNYYQRAGLNRNNRLLSPTTRRAFKARKKSNIVKGQWTVDEDRLLIQMVEQFGMRKWSHIAQKLPGRIGKQCRERWHNHLRPDIKKDIWTDEEDKILIQAHSEIGNKWAEIAKRLPGRTENSIKNHWNATKRRQYSKRKCRSKYPRGTLLQDYIKSLNLDQNPPRDFRKRSSANAKKTVTCSTSKSATQQIPQPQIANQFCPNDRPGPNYEFNDFSLDDNLFEEG…
Poncirus trifoliata|Ptrif.0003s0476	41.9	Rutaceae	TATTTTTTTAATTGTGATTAAAGAACACCAACTGCAAAATTAAGGCAAATAACAAATGCTTAGCGTTATCACTACTAATCCGTACTAAAAGTAGTCTTTAATGTAGATTGATTTTTCTTTATTTAACATGACCATAATTGTGTTTCTTAGTCGTAAGACCAAATTTACCATTAAATTTATTTTTAAACGACTCGCTGAATTTTGATATTAATATGAAAGAGTAAATTAACTTATTTAAGATTTTGTTTGAAAACCATTTCCGTTACAAACAACTATTACTCATTTAATTTAGATAATTTGTAATTATCTAAAGTGAACCTTAGCCAAAGCTATTTTTTTCAATTCATATTGACGGATTTACCCTCGTTTATTTCCTTCTCCTGATGCCCCATAAAAAAT…	MKPELPFEVPSSKGTNITNNLQDFDRHHHDLDDDDGHHHLFVNLNGSSSTNPFAVHTPCFESLDAFPYNYSSSSNFDFYECKPFADHNYSSGNGQVMDNFQSGGYLNYHQQQQVNPVDILGSDHRSHMQLDFQEMKPVNFLVSDEVSCVSAGNGYYKKAGMNKNNNRAYNSVRKTMKIGKKSNVVKGQWTTEEDRLLIRLVDQFGIRKWSHIAQMLPGRIGKQCRERWHNHLRPDIKKDIWSEEEDKALIEAHAEIGNKWAEIAKRLPGRTENSIKNHWNATKRRQFSKRKCRSKYPRASLLQDYIKSLNLDAAGSSKHQRKNSSNINANN
Solanum lycopersicum|Solyc06g071520.1	36.3	Solanaceae	TCAAATTTCATATATTAAATTCGCCACTAAATAAAATTAACAACGAATTTTATTATTTAACTATTAAATTTATCAATTGGTAATTTCTATCTTTTTAAATACTGATTTATTCATGAATGGAAAAGAAAAATGAATAAAATATTTTATATACTAATTTGGAATATCATTCCACCTACTTATTCTTTGTGATAATAAATTTGAATCTAATTTTAGATACATACAAAATTGACTTGAGTTGATTAATCACAACTATCCTTAAAAAAAGAGAGAGAAGGGGTATTAAATCAACTTTTCTTTAATGTATATTTCCTTTCCATCTATATAAAAAAGGTAAAATGTATTTAATAATACATACCCAAGAAAAAAGTGGATAATTTGACCAAATAAAAAACAGATTTG…	MELDPFFMSNNNMMKQENDDFCIDSKDYLQDLEHLDHNFSNTFNNFSENFMIDDNTNGTYHDPFDPFSNIQDNFSSLGDFNFINYEVNPFDQENGESSGSKLVMKNNFHVVDGVNVPDDQSSCVTGDIHHNNLSSSMKKKLGGSRGRPKKSKSSKGQWTIEEDRLLIHLVDKFGVRKWSQIAQMLKGRIGKQCRERWHNHLRPDIKKDFWTEEEDRILIQAHGEVGNKWAEIAKRLPGRTENSIKNHWNATKRRQFSKRKCRTKWPRPSSLLQNYIKSLNLEKGSTKKSNDTNPNGRVDLIRRVNYPGGSGYTGSIPEKKNENLVNRPNKCHAKVSPKPEAIEFCQGNNNIGDFDLSEVPEFTLDDNFFMEEINIPHVGSSSIMVNENNYEKCMGMEIM…
Beta vulgaris|EL10Ac5g10736	35.6	Chenopodiaceae	TAGTTCATTTTAAATTCTTCAAATTTAGGTAGAAATGTAAAAAAAACAAAGAAAGAAAGGAGGCTGTTATGGGACAAAAAAAGTCGGTTATAAAATTTTGAAACTTTATTTATGTTGGAATTTAATAGACCTCTTTTATTTTATTATATTATATTTGTGGATTTCTATAATTATTTATGTGTTCACTTCTTCAATCTTTATTCTTACCATTGCCTACCTTATAAAAGGGAGTCCTACTAAATTCATAAATATGGGTAAAATTGTCATTCTATTTTTGATGGCATAAGAACTTCTTCCCATCCCCATGCTCGTATTATTTTGTTCTTTTTTTGTTTGAGACATAGGCTAAATGGCATGCTCATCTTTTGTAGCACTAACTCAAAGAATGATTTTCCTTCC…	MDFDAKYKENFSSHHLPLFFHENYSKQRDEFAIEEALSSKGNTSFIQDVHPLENFSINASSSTSNHGLFSIQPNCFDSFENSPYGFLPSFDLFETKLFGNHAMNNGSLAPFMDNMNQNIGGGGGVGILGHSQMITTPINMLNNSSTQNYNPFSYYELGPPKYRPSDEDSCTTPKAHGTAISSGLSTTTMVRRGRKKKPNVVKGQWTIEEDRLLVERYGVRKWSQIAQMLNGRIGKQCRERWHNHLRPDIKTLSGPTNPFRQVQVSKIASREKDLWNEEEDRILIKAHAEIGNKWAEIAKKLPGRTENSIKNHWNATKRRQYSKRKCRSKYPRQSSLLQEYIKSLTPETINAGCRKKPPSSGNHPNSLENTTKSSNDQSGYSNSGSSDRIGPEYDFSEVP…
Populus trichocarpa|PtStettler14.15G066600	41.8	Salicaceae	TCGTAAAAGGTACAAATTTAATACCTAAAATAAAAGGGAAAAAATTGTATTCCTTCTCCTTAGATTTGGTAATACGAATAAATAGTATATAATTGATGAAATATTTTTCGCTGGCATCTTGTGTGTGTGTGTGTGTTAAATTACTGTCCAAGAGGCCATAGAAATTAGCTTTTTTCCTGCAACTTCAGTAGTCTACGCCAAGGGCATGTACTGATTAGAGAATCACTGCATTAAACTCATCTTCTTCGTAACCTCAAAGAATAAAAGAATTAATATCAGAATGATCAATAAAGAAGACATAACAGTTACCATTTTCCACTGTTATTACATTTGAGTTTATTACATCCTTTTCGCCTCAGATATATAATATATCCCATCAAGCAAAAGAGAATTAATTAA…	MFLSNKPYMKEDYFPFETVPASPSSKGFLQDFDHLDDDHDSQFHANGSASNPFFGVQTGSNFDSFDAFPYGLSSDIDFYDYECKPFVGNINGGGGHGHGQVNEDLQSGVYLNMSCDQRNPIDDIGSNQGHVSLNFEEITPVSFVVPDEVSCVSAATNECKRKMGLNKTRALLPPARKAWKGPKKNSIVKGQWTTEEDRILIQLVEQNGVRKWCHVAQMLPGRIGKQCRERWHNHLRPNIKKDTWSVEEDKVLIQAHSELGNRWAEIAKMLPGRTENSIKNHWNATKRKQYSKRKCRPKYPRASLLQDYIKSLNLDSGITGRGLGITTASTDIILDNNTRMKAPELLPPDLVLFKDNDDGLVPNYSFNEVPDFDIHEKIFRGGCSVDSILDELPCDHSVA…
Carya illinoinensis|CiLak.11G025400	40	Juglandaceae	GCTATAGACTGCTTTCTATTTTTCAGCAACATATTGGTTATAAGAATAATTTTAAATAATGTTAAATACAGTTTTAAAATATAAAAGTCTTGCATAATTCTTTTGAAAAATAGTAAAATTTACTATTATAAAAGTATATTTTTTTCACGTATTTCTTAAATTTGTCCACTTTTCTTTAAAGTGAGTACGCGTAATTTGCATGCTTTAAAATTGTGCAAATGCTTTCGCCTCCCTTTTTTTCTCTCTCCTCAAATAAAAGGAGAAAAAAAAAAATGAACTACATAGATTCCATTGGCTCAAATTTTTTAAAAAGAGAAGAAGACGGTACATTGTGGAATCTATTGGTAGCCTCGTAAGGAATGTTAAGATGAAAAGAGCATCGTACCTTGGAATTAAAAA…	MELETKLRENLAPQALLLSDNHLKPYMKDEFSFGTPSKGFLQDFQSLDRFHTKGSSSNPSFGVQTECYGSLINNFTYGCSTDFDDIHNYCKPFADNGGNGQVMDNFLSGGYLNIPQRNPTDDTMGTDQGYMIFTTCQDIKPVNFVVLDEVSCITAENGYNKKVGMNKNIALPATMRTYRGHRKCNFAKGQWTTEEDRLLIELVQQYGVRKWSHIAQMLPGKMGKQCRERWHNHLRPDIKKDVWSEEEDKVLIHAHAEIGNKWAEIAKRSPGRTENSIKNHWNATKRRQYSKRKCRSKYPRASLLLKYIKSLNLDSNTAKIGENLLQVMLQQPMTPPSKHQFFSRSSVPTIQTTIFVLMETCFKRAVALILFSMQTRPVLLLLM
Joinvillea ascendens|Joasc.S102000	29	Joinvilleaceae	CATGCATGCTAATATATGTCACAATCTAGAAACTTGAGCACACTACATTGCTAGTAGTATATTTGGGGAAAAAATTATATTTCGATGTGTAGCGCCATCTGGTCTGGTGCTACATTACTAGCGCCGGTCATCATTTTGGCGCTACACGTGCTTTCCCGTTACGGACCCCAATCAGCAGCACCAGAGTTGTGGTGCTATATAGCGCCATTAATCTCGACGCTACAAAATCAGGTTATTTTTAAAAATAGTTACAAGAGCAGGGTATTTTTTGAATTAATTATATTTTTTGAATATTAAATAAAAAGAACTCACTAGTTTGGATGGCTGACAACAAATTGACGGAAGGGACCTGATTTAAGCATGCGGGATAAATTAGGGATTCTGGATGCTAAATTGAAA…	MDFNCFQPHITNNKLLFDPYIQENVVQDYHHVDDPFEAIPAGYPSTLGDLLPKNTQPFATFHNIGPQYYAQGAVNQPVMNRTFMVHKVETLMPPFSPKSEVSHVTRSSSGAYQTFKLSSKCTLREKGSGKSLKKLMWSKGNGHWKNIEKVKKLVEQFGLRKWSHIAQMLLGRVGKQCRERWHNHLRPNIRDNKDTWNEEEDMILIQAHKEVGNKWADIAKQLPGRTENSIKNHWNATKRKQFARTRSRNSSRNPKSSTLLQNYIKSPGLGPSKAITPLVGSELAALSPMPTPAPLKTEAKRMESGLPSIMLNNGTYDMHDDTYYQTQACKDLLVPTCDDFAIDIWDGFFDTKKELPHEEYSTDDVSDMDYVFNHIDHAAKVGHILEMEIVWVDNDMVDT…
Manihot esculenta|Manes.14G064900	45	Euphorbiaceae	AAGTTTTAGCTTTACCTTGACATCTATTAGATCTTTAAGCACAGAATTAAACTATCCCAACTTTGACCGTAGTAATGAATTAGACACAAACGTAAAAGAGAGAATTAATGTCAACTTTCAATAAATTTCAGTTTTAAATTATTAATTCTCATGTAAAATTCTTTAATGTTAGTATTTATGACTAAATTAGCTCACCTACATGTTACTCAAGCAATCCACAACTTCACATACTAATTAAGTTGTATATTAAACTATCACGTAAAATTAAAAAATAATTAACATATTTAAAGTTGTACAAATTACTTGTGCCAAAATGAAAATTAAGTACATAAATTGACTAGGTTTAATTACCACTTTATCCCAATTTATGAGCATCTACAGTTTCAAAACCTTCCTCCT…	MFISDNQSIKPSIKNGFPFELPSLPSKGFLEDFHHFDQFYANGLSLNPSFGVQSGCNFNSFDAFPYGSSTNMDFYDYECKPFADTNGGHGQVMDNFQSGRYLNLPESNPTDMMVSNQNNNMSLNFQEVKPINFLVPDEVSCVSANHEYHKKVGLNKNRASPSARRTWKGCKKNNLVKGQWTIEEDRLLAQLVEQYGLRKWSHIARMLPGRIGKQCRERWHNHLRPDIKKDIWSEDEDKVLIQAHAEIGNKWAEIAKRLPGRTENSIKNHWNATKRRQYSKRKCRSKYPRGSLLQEYIKSLNLDSVPGRYQGTIKLKAKSSAAIDTTAVNMKARNQLQPQAASNVFPNDNRSVPNCYDFNEVPDFDFDEKLFQEGCSFDSLLDEIANCDHVVDEKSFEQM…
Malus domestica|MD06G1172900	42	Rosaceae	GGGAGCGCAAGAGGGTATTTCCCTGCTCTTTTATACCTTTTATTAGGTGTGACATTCCTAATTTTAAATTTTAAATTTAATGAGCAACGGTTAAGCAAAAGAGGCAATAAAATGCTTGGCGTTATGCAAACCATTGCAATTAACAGTGGCGATTAAGTCTCTAATAAATTTGACAGCTTCTGAGAGTGAAGTCTTTCTTAACGACTTTTACTAAATTAACTTCATTGATTAGAGTAAAACCGATTTTTTACTCTCAAGTTTGTCCTAATTGACTTTTAATTGACTTTTACTTTCTTTGACCATAAACCAAAATGGGAACAAAATAAAGGCTGATTTGGAAAATTCTTTTAAAATGATGGAAAACACTTTCAATTAGAGTGCTTTTGGAGCCAATCCTTA…	MELNKLRKKLVSQIHIPLFASENYVKPYAMKDEFLFETSSSSKRNYNYLQDFHHLDHQFHVNVSSSNPMFGTHTPCFDPYSDTSYPYDQNSSHQDVNFYKCKPPNVAENNGGHGQVLDNFQGGSYLNFPTHHRSSNPFDHAVGTSSHGSATNFLPLDCTQDIKPMNFSVPDEVSCINNADQNGYYRKFGMNGKSKVTGVTRGSMVKGRKKSNVVKGQWTTEEDRLLIQLVEQFGVRKWSHIAQMLPGRIGKQCRERWHNHLRPDIKKDTWSEEEDKTLIQAHAEIGNKWAEIAKRLPGRTENSIKNHWNATKRRQYSKRKCRSKYPRGSILQEYIKSLNLDSASNSTGRQRRNSSANNNNGGSTSTKAAAAAATYQQPQTNVGLLCANDLLVPSYNDFN…
Eucalyptus grandis|Eucgr.B00301	42.9	Myrtaceae	AGATTACTTCTTAGTTGAGACTTGAGTCACCTTGGAGTCAAAAAAGTTATATATTCAACTTCTTTGTTTTTAATCTAGATAATGACACAAAGAGTCTTTGAACTTTGACTTGATGTTCAATGTGGTTTTTGAACTTAAACTTAATGTACAATGCCATCCCTAAACTTTTAATTTGTTAAATGTGTACCCAATACTTTTGGTACAATGTTAAGTTAGTCCTATCTTTACATTAATATAAGTTCAGCGATAGCTAGTTTATGGATTAGATTGAAAATGTATCCAAAAGTTCACGGACCATATTAAACTGATTGAAAGTTCACATTAGGCTAAAGGTCATGGACTACATTAAAAAAATTAAAAATTCATGGACTACATTGTATATTGGACCAAATTTCAGAG…	MDFHSKLDEDFASHQTYLSDNCIKPCMRNRETAFGTVSSTKGNFLQDFNHIDQFYIGESSSNHALNKQTASFDPFDLYPYKVFTDLDVYEDKPFAENGGHGLVMDNFQVEGSLMAVTTANIMNESGRSHMLGDYHQDIKPVSFVVPDEVSCISAGNGYYKKSLVNKSKASSSRRTRKRPHVIKGQWTTEEDRLLIQLVEQFGLRKWSHIAQMLPGRIGKQCRERWHNHLRPDIKKDTWSEEEDKILIRAHSEIGNKWAEIAKRLPGRTENSIKNHWNATKRRQYSKRKCRSKYPRASLLQDYIKSLNLSASAKNPRKSSAGSGDCAIVANDDDDASSSNPTSDEPRLEIMDFCSGDRLVPNFEFDEVPELSFDDKLFQEGCTIDSLLEDLPCPPDATHV…
Arachis hypogaea|arahy.Tifrunner.gnm1.ann1.HJVQ9Q	40.2	Fabaceae	TATATTATTTAAAACTATTTATGTTCACATAGGTCAATTAACAGAAACTATTTTTCGCTTGAATAAAATTGCATCTAATAAGAAGTTACATGCGATTTAATTAATAAAAAAACTATCTAAGCTTTCATATATAAAGAATGTGAATAATTTTATTAAATAATTATATAAATTTAGTTCTATGAATTAATATATTATATTCACATTAGAAAAAGTACGAGACAACCCTTTACATATTTCCAAATTATTTTTAATAAAATTTAAAATTAAAAATAAAGAAATGGGTCAACTAGATTGTATCCGAATTTGAACGAATTCATTGAATTGGTACGAGAACATATTTTCTTAGCTAATTATATTAACATATAATTAAAATTTTGATACATTATCTCACATTTAAAC…	DFQTNLRETFASQTMQYSLTMKEIDLPFGVPNSSHGFYHDLHHHVDQFHQVNVNGNSSSSNHQVSLTNLDSFDVYECKPFVENNNVHVMEDFQYNGGGFGNLNLTNNNNQSTPLDIIVGNQGYLPFYPLQETKPTNLVVPDEVSSISTMGYYKRVNGVNKNNKLYPTSKKTYKLQKKSNIVKGQWTESEDRKWSHIAQMLPGRIGKQCRERWHNHLRPNIKKDIWTEDEDKILIEAHVEIGNKWAEIAKRLPGRTENSIKNHWNATKRRQYSKRKCRSKYPKASLLQEYIKSLNLDKNPLMDYRRKSVNPRGNANKTSSAASSKAPPPLSAAQPQPIGNNSQFSMSDRLVPSYDFNEVLPDFCFDENLFEGGCSIDSLLDDIPCAPIMDTNTINVVDVD…
Lupinus albus|Lalb_Chr13g0297751	41.1	Fabaceae	CCAACGGTTTTTATAATGATATATTCAGTTCAAGTGTTATGCCTTTTGTTGGACTAAATGCTCTGTTTTCAGTTCATATAAGGATTGTTCAATTGGTGACAATGTTTGGTTCGAACCGGTTCAAGCTTAACTGAATTTCTTCATATCAGATAAGTTCATCAGATAATCACATCTTCTAAGTAAAATTGATTTATTCTCCACCCACCAAACTGCAAGATTAACAAACAAAATGCTTAATGCTTCAGATCATTAAATAGCTCTGCTTATTTACAATCCTTCAATTTGTCCCTAAGCTAATGTTACACATTGACCGAAGTAAATGACATGTTACATTACTAATTACTACTAACCCTTTTAACCTTGATTACTAATAGTTAACAGTTTTCTGAAGCTAATGAT…	MDLDTDHRENYASQPMHLQENYLKPGTKDELPFAAPSSQGFMQDFQHVDQFHHANASSSNQNFGVQTQNFDPFVNIICGCSQADFEGYECKPFVENNGNVNHAHVMEDFQYEGYSMNLPRRNQMDMMPSNQIYLPFNPLETKPLNFVAPDEVSCISATNYYRRFGLNRNNKTSPTTRRSCKVKKKPNIVKGQWSEHEDRLLIQLVEQYGVRKWAHIAQTLPGRIGKQCRERWHNHLRPDIKKEIWTDEEDKILIQTHAEIGNKWAEIAKRLPGRTENSIKNHWNATKRRQYSKRKCRSKYPRGTILQDYIKSLNLDKNPPIDYRRRSSVNAMRIKASASKIAAAAAATATQPHSTNQVSPNDRLVPNYEFNEVPDFCFNDDMFKEGCSIDSLLDDMPCA…
Spinacia oleracea|Spov3_chr6.00643	36.8	Chenopodiaceae	AGTAAACATGTTATTCCATGAGAATATATGTTTTAATGTTTTTGTCATATGTACAACAAACTTCTTTGGGTAAAAGCTAATTCCATAAGAATTTCCTCCCAACTCCATGCTCATGTTTTGTGCCACCAACTCAAAGTCTCAAATAATGATTTTGATTCTGCAATTAAAAACAGTTTGTCTCGGATCTATTAAATTAAATTGCTTAATAGTCTACTATGGAGTGTTGGATAAGAGATTGATGACATGGCATGTGGTATGGTATATAGTTTCAGTAGCATATAATTATCATAAGACATCTCAAAGGAATTTGTAAACTAAAATATCGATATAAAGAAACTATGGAGTATAATTTTTTTTATTGGGTAGCAAAGTTTAGTGCATTGCAAGTTTGCAATTGTA…	MDFDANYREKFPSHLPLFFPENNYSKPPRNDQFSLEEANLSLKGNTNFLQDLHPLENFDLNLDLDGSSSASNALFPIQPNSLEPYDLNYNSTFGCFPNFELYETKPFANHAPNNNNNVALGSNLIDNYNQSGGGLGILGHSQFINPINNMISSPSPQSYNPFCYYDLGLTRSSYRLSDEDSSTTPQNDATVVVPSRLSAATTVRKGGKDHRKKKSTVVKGQWTMEEDRLLIQLVGRYGVRKWSQIAQLLNGRVGKQCRERWHNHLKPDIKKDVWSEEEDRVLIESHIEIGNKWAEIAKKLPGRTENSIKNHWNATKRRQFSRRKCKSKYPRQSSLLQEYIKSLTLETINAGCRKKPISFNNNQLLLPNNDDQTGSSNSSSSDPLIAPEYDFSEVPDFNF…
Mimulus guttatus|MgNONTOL.I0449	38.4	Scrophulariaceae	TTTGACTGACAATTAAATTTATTTTTTTTTAAATTATTTTACTAAAAAACAGTGTCCAACCAAATTAAAAATCAAATTCTCGTGACGTTATAGTGTCAACACTCCGTATATACAGTAAAATCTCGATAAATTATAAAATTGCTTAAATAATAATTTCTTCCAATCCCAACTCGATAAATAAATGTACTAAAATATTTTTTCGATAATTTGATATTTCACTAAGTTAATATAATTTTGTTAGTCCAGATTATATTAATTTATAGAGGTTTAATTGGACAATAGTTATATCAAAATGTGGGAATTTGAACAATTTAAATTCTAACATATATATTCTCTTAGTCAAATGTGCATACTGCATATTACTAATTTAATGTCCTCTTTATAGATAGGGATAAATTG…	MESATNSANDHYAPPPPISLFNNTLKLETLDYDNNIDFCMDSNFCMASFDPFDPFVSAFSSSNSVFDLHEFKNYEENGISSTTTCTYNNFQGDGFLNFPNTKDMLMMEIETSFLNCGSDDNSRKPPLGFLNVPDESSADNFGTKRNRNNSNIINPKNKRNSNAKKSKSAKGQWTIEEDRTLIHLVEKYGVRKWSRIAQTLKGRIGKQCRERWHNHLRPDIKKDQWTEEEDRILIEAHGEIGNKWAEIAKRLPGRTENSIKNHWNATKRRQFSRRKCRTKWPRPSSLLQNYIKSLNFDNKSSTASRNNNNIIEPTNHGLGPDNASLNSVMEEGSFVQMPEFDDVADFDFDEDHMSIGSFMDDIGDEPCFDLELPFDMPPLI
Citrus clementina|Ciclev10024427m.g	42.8	Rutaceae	CACTACTAATCCGTACTAAAAGTAGTCTTTAATGTAGATTGATTTTTCTTTATTTAACATGACCATAATTGTGTTTCTTAGTCTTAAGACCAAATTTACCATTAGATTTATTTTTTAACGACTCGCTGAATTTTGATATTAATAAGAAAGAGTAAATTAACTTATTTAAGGTTTTGTTTGAAAACCATTTCCGTTACAAATAAGTATTACTCATTTAATTTAGATAATTTGTAATTATCTAAAGTGAACCTTAGCCAAAGCCATTTTTTTCAATTCATATTGACGGATTTACCCTCGTTTATTTCCTTCTCCTGATGCCACATAAAAAATGTACCATCAAATGAGTTAAATTGACTTGATTATGTTTTGAAAGTTTTTTTTTTTTTTTAAAGTCCAATG…	MKPELPFEVPSSKGTHITNNLQDFDRHHHDLDDDDGRHHLFVNLNGSSSTNPFAVHTPCFESLDAFPYNYSSSLNFDFYECKPFADHNYSSGNGQVMDNFQSGGYLNHHQQQQVNPVDILGSDHRSHMQLDFQEMKPVNFLVSDEVSCVSAGNGYYKKAGMDKNNNRAYHSVRKTMKIGKKSNVVKGQWTTEEDRLLIRLVDQFGIRKWSHIAQMLPGRIGKQCRERWHNHLRPDIKKDIWSEEEDKALIEAHAEIGNKWAEIAKRLPGRTENSIKNHWNATKRRQFSKRKCRSKYPRASLLQDYIKSLNLDAAGSSKHQRKNSSNINANNKSKAATKSSPPAAAEQDFCRSDHLVPDFDFNEVPDFDFDDKLFDENCSIDSLIEEMTCAPVVDHQKSL…
Lactuca sativa|Lsat_1_v5_gn_5_14920	39.2	Asteraceae	CCTCATTCAATTCTTGTTAATTAAAGACAATCAATTCGCTATTTTTTAATTGGCTACTATTATAAGCTTTCTCTATCATTTTTATGGACTAAAGGGTATGTTTGTCAATTTAAATAATTGACATGTTCATGAGTCAACTAAGAAAGTACAATGGTGTTCATGAAAATACAAACATCCTAATGGTATTTAAGTGTTGATATAAATTCAGGATTTTATTGTCCATAAATAGGAAGAATGCTCCATTTTGGGAAAAAAAATACAGGAAAACATAATTTTGTTTTTATATTTGTTATTATATGTGCGAATATGAATATTTCTTAATCATATGTTTATATTCTCATAATTTTATCAATTATCACTTATGTCTGATTTTCATGAAATTAACAAACATGTATGATA…	MDLLSQNEDDFHVDTKGVFQDLHQLDNLCLAGSSFHPDYATHVEGYDPFGPLSYGLGSNDLEVYQFKPLEHVNDVEMVMNLNNGDKSFTGWDFSNRLECPIQDPKPMRFFVPDEGSCVIADNGIEKGNKKTYKGKNMTNSSKGQWTREEDRILKEMVEKYGVRKWSYIAQKLKGRIGKQCRERWHNHLRPDIKKDFWTEEEDRILIAAHAEVGNKWSEIAKKLPGRTENSTKNHWNATKRRQYTRRKCRSKWPRPSPILQNYIKSLNLPRGRMNSNHSNLGDDFDYNEVPEFAMDEKLLEWDNDIDSLLDDLPSNCNNGGEEVDSYLQGDVKEMDLMEMISQVNL
Corymbia citriodora|Cocit.B0062	43.4	Myrtaceae	GTAAGGAGGGTGACTATAAAAGATGACTTCTTAATTGAGACTTTTTCAATGTCTCTATTTTAAATCTAGATAATTATACAAATAGTTCCTGAGCTTTAACACAATATTCAATGTAATTTTTGAACTTTACTCCAATGTGTAATGTCATTCTTGAACTTTTATTTTATTCAAAGTGGTTCTTAAACTTTTGGTACATGTTTAAATTAGTTTCTAAATAATATGAAAATGTTCAATATTGTCCTTCCATTAATTCAAGTTGGGGGACAAAATTGAACATTTTCATATAATCCAAGGATTAGATTGAACTTATATTTAAAGTTTATAGACTATATTGAACAAATTGAAAGTTTATGATTACATTGCACATTGGGCCAAATTTCAAAGACACATATGTCATTT…	MDFHAKLDEDLASHQAYLSDNCIKPCMRNNETAFGTVSSTKGNFLQDFNHIDQFYVGESSSNHALNKQTPSFDPFDVYPSKVFTDLDVYECKPFGENSGHGLVMDNFQVGGSLMAATAANMMNESGRSHMLGDYHQDVKPVSFVVPDEVSCISAGNGYYRKSLMNKSKASSSRRASRKRPHVIKGQWTTEEDRLLIQLVEQFGLRKWSHIAQMLPGRIGKQCRERWHNHLRPDIKKDTWSEEEDKILIRAHSEIGNKWAEIAKRLPGRTENSIKNHWNATKRRQYSKRKCRSKYPRASLLQDYIKSLNLSPSARNPRTNSSAGCGDCAMVADDDDVSSSNPASDEPRMELVDFCSGDRLVPNFEFDEVPELSFDDKLFQEGCTIDSLLEDLPCPPDAAH…
Cucumis sativus|Cucsa.196850	40	Cucurbitaceae	AAAGTGGCTAAATTTAATTTGTAAAAACAAAATGAGTTTGATATTACAATTCATACGCAACACTCAATCAAAAATTATCCTTTAAGTTCCATTTTCAATCTCCACAAACACGGGTCACATCGTCATAACCTAACATTTGTGTTCTAAAGTTTTTTAAGTGCGACCACATCATTATGGACATTCACACAACTATTATAGAATACAATGACATACCATCAACTTTCTTTTGTTTTGTTTGGAGATCTTCATTCTCAAACAACGTTTCACATTCCCTTCAACTAGCTAAATTAAACACAATTGACCCCTAATTTAATTTTGTTTTCGCTCTATGAGTTCCAAAACATGAAAAAACGAGTATAAAAACACTCGAATGAGATATAAAAACTCAAAGTAATATCT…	MELESNLREENLSTEICKKDELLSSFENFASAKGNNYLQEFHHLDHQLHPIANSSSNNHVMEDENLCSNFDSLNNNQYSHGIDQEMYEFNYKGNAAADQVMDNFQNCGDYYYYCNNFHQRNHQIEIMGLERNSINIPLNFPEIKPVNFMVPDEVSSIDSARNGHIQKGIINNKNVNFSSLLRTSKGRKKPNVIKGQWTVEEDRLLIQLVEQYGVRKWSHIARMLPGRIGKQCRERWHNHLRPDIKKDTWSEEEDRVLIEAHSEIGNKWAEIAKRLPGRTENSIKNHWNATKRRQYSKRKCRSKYPRCSLLQDYIKSLNLDSNTAVRHQKKSSAAISSAVNNNNKSKSADQHYHHQVQTTDFCPNDWTVPDFDFKEEPEFYLDDSFFPEGCSINSLMEDI…
Thinopyrum intermedium|Thint.01G0497400	33.6	Poaceae	CTACAGATGTAACACCTACATAATCCAGCGGCCAGTACATATGTTAGTGTTGTGCAGTTTAGCTATCAGTCTGATACTCGTTCCTCATATATACAAGAATGAAAAATCCTGTCAATCAGTAGTTTATAGTCAAGTGCAGAGGGGTCTAGCACGATCTGATGTACTTCTTGATTCTGTCGCAGGTCACCATTCTTCAGTATGCTCCTCAAGATGGCGATGGTGGATGCCAGGGGCGACGCGTTATCTCATGGCTGCAAGCAAGAGCAGCTCAGTCTGGGATCAAGCACGGCAGCCCAGGCAGAAGCGGTCGTCACTTTCATGCCCGCCAGAGCTTGTGTGGTGTGCGGAAGGCGAAGGCGCCGTTGACGCTGACGACACACACAGTGAGGTCGTTGCCAA…	MGFSCFQLHSGSCDDVPLDFHVQQNGHCELHSVDRSFEPAGGSIVPFATFYHESYPQGTTKKDVVDGASSIIHNPGPHLPLLSPKPEISHLVGGGMGSYKTYEMRGRFIPRRKASSKAVKKANVVKGQWTPEEDRKLVKLVEQFGLGKWSQMAQMLPARVGKQCRERWHNHLRPNIKKDTWSEEEDMVLIQTHKEVGNKWAEIAKRLSGRTENSMKNHWNATKRRQFARRRTRTRVKNPRSGTLLQNYIKSLGVGPSKVIAPLDPKDHPLSPSPPTQNRAPVNDNWPESNLSNTVVTQGIFSTDDGQIQSCEEILVPTSDDFSVDMCDGLFDTKEEAQYQAYNIDDDVDMDYILKPC
Vaccinium darrowii|Vadar_g2500	40.4	Ericaceae	TCTTAGAGCACTATACTTATTTAGACAAAAACCAATTAAGAATTTTCGGCCAGATAAAGTATAAACTATTAAAAATGACGAAAATAGGTTATTGTCCAAATAAAAGACCTTTTCAGTGATTTCCCAATTTGACAATCTTATGAATCCCTCAAACAAAATTGCCTAATTAAGAGTCAAAGACAAAACTAATTAAGGCCAAAATGGCCACTAAAACAATAAATATGTCCAAAAGCTTTCGCATTTTTCATACCACGTGTTAAAAAAATTTATTATGCTGCTGCCGTAGCCAGAGTAACTTCCACCAACTTATAGCAGTCCAAGTGGTTCTTAAGATAAACATTTACCAATAATTTACATTATTACTAAAATACCCCTACACCAACCCAATAACTTTGTGCC…	MEFDKNYREQEEDLTYPSLLPNNHLKSEIIEGEEEDDDFCFQDFDHHLDQLSFTGSSLNPDFDIENPCLDPYDPFQNIGPLSIDDFYELKPFSDHQNEGNGTTENYAGAMQYPRKIPVDESAPNPGSMPFICEDVKPMNFVIPDEGSCITADQNIGHKGNLGIRKNGAPQSRRPCSNKGRKKSNSVKGQWTIEEDRLLIHLVEKHGIRKWSQIAQMLKGRIGKQCRERWHNHLRPDIKKDIWTEEEDRILIHAHAEIGNKWAEIAKRLTGRTENSIKNHWNATKRRQYSRRKCRTKYPRPSSLLQNYIKSLNLDGKSDTMTPVPPPLSSLFKAPLTLPPPPPPLPLPPPIHQPETFMEFCVSDRLVPDFDFGDVAEFAFSDKLFEGSSIDSLLDQLPPV…
Cicer arietinum|Ca_17087	31.9	Fabaceae	TTAAAAAATTACAAAACAATTACTATAATTTTAAAATAAAATCAATTTTCCAACTTAAATTCCAACTAATTTTTAATTATTAAAAATATCAGCCAAAATTTGACGTACTACCTCTCTCCAATATATTTTTACAAATTTAAAACTTAAAATTTTTATATACAATACAATATTATATTTTTTAGTTATCCATTAAAATTTTAAAAATTTAGAGTTCACAAAATAAATTCTACTAATACAAACCATTGACCATAATAATTAAGTTTGTAATTTAAATAACGTAACGTAAAAACTATAATTGTCTTTATTAATGAGTAACAGTTACTAACTTAGGCATTAAAAATAAAAATATAATCTTAGATTATACTAAGATGTGATTTTATTTTATTTTTTTACCATTAG…	MNRNNARKTEKVQKSNIVKGQWTVQEDRLLIQLVEKYGLRKWSHIAQLFPGRIGKQCRERWHNHLRPDIKKDIWSEEEDKILIKAHSEIGNKWAEIAKILAGRTENSIKNHWNATKRRQYSKRKCRSKYPRGTLLQEYIKSLNLDKNPPKDYRRKPTNNATLFKNKTSQITLSQTPYQQFCPNQCLVPSSDFDDVQDFESLFQDGCSIDSLLEDMKCGSSVNLVDETDIMGSVMVGVEVKKEMVSLLN
Fragaria vesca|FvH4_5g05420	42.1	Rosaceae	TGCGCTTCATGGACTTCGTTGTACATCTCTTTTTCAAGCATTTGCCTCTGGCCTTTTGGCCCTGACATTGCTGTGCTTGACTGCTTGTTCTTGAAGGGCTGCAAGCTCTCATATTCAGGTCAAAACTCCATTACTGTTCTCTTTTATACTTCTTTATAAGTGATAATACTCCTGATTTTATTTGTTGAATTTACTCAATAACAGTTTCCACTACAAAGTAGTATAATGCTTAACGTTAGGTAAACACTCGCTCTTAATGGTGATGTTTAAGTCTATGTAACTTGACATGCATTTATTGTGTCTCATAATTTACGACTAGCTTTTACCATAAATTACATTCTTACTAACGATTCGATAAATTAACTTCATTAATAACGAGTCACGAGTCAAATAAAAAAA…	MELNKLRDNLASQIPLLVPENNNSYMMKPYNMKEEFIPFEPSSSSKGYLQDFHHLDNQFHQYASGSSSNPMLGIQNPCFEPYYNENNNACYTYDQGSPADVNFYECKPLIISENLGHGQVLDNFQSGSSGGGYLNFPNPRSNPIGHMMGISHRSGTNFLPLTNSQDIKPVSFVVPDEDSCVNSENGYYKRVGMNHKGTSRLSTISRAGSTFKGRKKNNVVKGQWTIDEDRVLIQLVEQYGVRKWSHIAQMLPGRIGKQCRERWHNHLRPDIKKDIWSEEEDKILIQAHAEIGNKWAEIAKRLPGRTENSIKNHWNATKRRQYSKRKCRSRYPRGSLLQDYIKSLNLDAAPNTGRQRKSNNNNSNSSPADHSNATTDSTKVQSQTNVGFNSENDRLVPNY…
Hydrangea quercifolia|Hyque.15G054000	42.2	Hydrangeaceae	AATTATTTTAACTGGTCCAACTGTCATATTATTTCGAACCAATATTGGGATGTATTGGCATTACTTATTTATCATTCCAGATAAGTTTTCAATAAATGTCATAAAATAATGCTACGCAATCCAAATTTGGTTATCATATAGTGCATCATATATTGTTGTATTGATCGATAGTATCTCATGCCATTACATGTGGTACAACTAATAAAGCATTTAAAAATTACATTTAATAATCAGATTTGAAAAGGATAGCAATAGCCATTGCAGACAAAAATGAAAATAAGTGAAGGCTAAAATGGTCTTTTCGCGATACTTATTCAAATCTTATCTACTTACTCCTACTTATTTCCACGTGTGCAAAGTCTTTTGTAATTACAATTCCTAAATGTCAAGTCAAATGTC…	MEFDTKYREDLTYPPLLLPDTYLKPEIEDEFSFESSSFQDFHHLDQLSPHGSSMDPEFGAQNPNFDPFDSFLYNGSSNLDFYELKPFSENGGLMQNFQGGGEYVNYPNRTIPAEAVPANRGVNLSFHYQDVEPMNFVIPDEGSCITAENGYFKEIRMKKSVKRPYNSIKGRKKSHSAKGQWTIEEDRLLIHLVEKHGMRKWSHIAQMLKGRIGKQCRERWHNHLRPNIKKDVWTEEEDRVLIQTHSEVGNKWAEIAKRLPGRTENSIKNHWNATKRRQYSRRKCRTKHPRPSSLLQNYIKSLNLDGHKKPENYPKISSAIDDPPKLDSKAPTQPLETSEFSPGDRLVPDYDFNDVPEFSFDAELLGESDNIDSLLDELPCPPIVDHEEGFDMDMASLMQ…
Linum usitatissimum|Lus10039966.g	34.8	Linaceae	CTAACAGGTTAGTGAGCAATATGTATATTAAACTTAGAAACAACCGTGGAACAAAATATATTTACTATTCATCAATTTTTTTTTACTAATTTAAAAAAAGAAATAGCGAAATAAAAACAATACGTTAAATTCGATCTTTCATTAATCACAAAATTAGTTAATCCTTACATAACTTTTATATTAAACATGATTTAAATTGTCTCCCAATTTAACCCCTCTCTCTCATTCATAATTTTAACCTTTCAAAATCAATGTGAGGAAAAACATACAAACAAACTCCAATTAGTAATATGCAACCAATTTGGAATTAATTAATGCCCGTTTCGATGCAACTAATGCCCACTTTAATGCTTCTAGAATTTGATTCTATCTTTTTTGTCTCTCTTAAATTTACTTTGC…	MWSLNQVYGGGGGGSNFDSFDGNLYGSPYYSSLNLDCFEYECKPFSDINIGYMNFQNNNNNYFERNLMLGSSSSNNNQMLNQEEAEIKPTAVAGAVMMNLDELNLYNNNNNNHQCDQYYLESSNNNTHLSTRRSGLMAPATATRKIWKGRKKNNVVKGQWTVNEDRILVQLVERYGIRKWSHIAQMLSGRIGKQCRERWHNHLKPDIKDTWTEEEDKVLIQSHAEIKNKWAEIAKSLPGRTENSIKNHWNATKRRLYSKGKCRSKYPCGSILQDYIKSLNLDTSAAANNLIASKRSSSSSTIPNKANSSLLLDDQYPQHNLSENDRLVPTFYYNNEEVPDFGFDGCNLDSLLDGLPPIVDGKGFDDLDVSIDDQQALIVAPSLRDDFEVEKELDLVEMM…
Ricinus communis|30147.t000208	37.3	Euphorbiaceae	CCTAGAAATATAACAACAGAACTCAAAAATGTGGAATCAATATGTTTAATTACCACTTTACCCTCATCATCTTAAATCCTATTAATAACAGTTTCAATGCCCTCGAGCTAATTGCATAAATTAATAATCTCTCTCACTATATGAGTGATAATTAAGGCAAAATTGTCATTTCAAGTGCTATGCAGCTTTTACCCACTTCTTGCAAAATCTTTGTTGTCCAAAAGGGTCTACCAAATCTGCTCTTGCACAAACTAAGCAATATTTGACATGGCATTTATTCATTGGAAAAATAAATGTATTCAACAACTTGAAAATTAAAATTGAGCCATTATTATCATGCCATGTAAGCAATTTAAATGTATTTACACAACAGGTAGGAGTAGATTCTGTTCTCTTTGT…	MDLYDYECKPLADINNIGSGGHGQVMDNFQNGGHLLHLSPIDMVGSNKVQGHMSLNLQEMKPISFVVPDEVSSVTANNHEYPKNVGVNKNNRVSASTRKTWKARKKNNVVKGQWTIDEDRLLSQLVEQYGIRKWSHIAQMLPGRIGKQCRERWHNHLRPDIKKDVWSEEEDKVLIKAHAEIGNKWAEIAKRLPGRTENSIKNHWNATKRRQYSKRKCRSKYPRGSLLQDYIKSLNLDPCPGRSYNQGKSCATDHAIASDLNNTMKLAQNNQPQVALEFVQNDRLVPNYVFNEVADFDFDEKIMFQEGCSFDSLLDGIPCDHHHNHVVDEKSFEINMAVEDDMTPLMMDFEVKKELDLVEMISQAKM
Brachypodium hybridum|Brahy.D01G0649100	32.1	Poaceae	GGCGGCGGCCGCCGCGTGGAGGCTATTCGCACCGGAGGCCATGGTGGGCGTCGCGCGCAGAGGGTGTTCAACCTCGTCCTCTTTCTCATGCCGTGAGCGCGGCGGCGCCGGTCGATTCGAAACTCGAAACGACCCATCCCCGCGGAGGCCGTCGTCGCCCATGCCGTCGGTTGCTTCCGGCTCCCTCCCGCGCGGACTGCGAGACCGACGCTTCTCGTGGGCGGCGACGTACGTGGAGTGTATTCATAGCAGGTGTGTGCCGCTCTCGTCCTCAGGCCTTTGCCCCTGTTCTTCGCGGTGCGCTTGAGCAGCATTTCTTCGTTTGAAAAACAAGTTTCAGTTTGGTTTTAGGGGTATAAATCTGCTTAAAAAAAATTCTGGGAGTAATCCTACCATCCT…	MDFSCFQPHTGNFDNMPLDFHVQQYGQYELHSVDRSFEPAGGSIIPFASFYHEYYPQGTMNKAAVDASSIIHNSESHLPLLMPKIEVSHLIESGLRSYKTYEMSSRFIPRKKSSSKALKKTNVVKGQWTLEEDRKLVKLVEQFGLRKWSQIAQMLPGRVGKQCRERWHNHLRPNIKKDTWSEEEDMILIQTHKEVGNKWAEIAKRLPGRTENSIKNHWNATKRKQFARRRTRSSSKNPKSGTLLQSYIKSLGIGCSKVIAPLDPKEPPLSPSSPPTPTENLVDVNDNLLESNSSNRIASQEIFSTDDIQTYSCEEILVPMCDDFSDMCDGLFDAKEAQYQVYNIDDDVDMDSIFKHIDYAIKIDHGIDMDMTWDDNALINIESESSPLVTPIGPAEIKT…
Miscanthus sinensis|Misin01G048700	28.1	Poaceae	ACAACCATGATTGCCCAATCAATTTCCATTATCATGAGCTAACTCAAATTGCCTCTGCAAAACACACGTTAGTCATAGTAATCTCTTGTCGTCAGTAATCACCGAAACCCAACTGGGGCCTAGATGCTTTCAATCTCTCCCTTTTTGGTGATTGATGACAACACAACCTCGAGTATGTAAAAGAGATGAGTGAGGTTTTCAACATGCTTGGTTCATATAAGCTTTTGACAATAAGAGCAAAAGGATTAGGCATGCTTATATGACCCAAGCCAACATGGTGTACTCAAAAGATATGAATTAAGTATGAGTACATGAAGTAAAACTCATTTGAATCGGAGTAAAACGCGAAAGCAAAGCCAATGAGCACAACCAAGTGACATGACATATATAAAACAATGT…	MQQNGCYELHPIDHYPFEVIGDYTSATFNDLGRRFFAEREIKNPMFDNASSVGNRVGTQVPLLTPKTEVSNLMNGGLGSYKAYEMNGRFLPRKKTSLKKVNVVKGQWTPAEDRKLVKLVEQFGLRKWSYIAQLLPGRVGKQCRQRWHNHLRPNINKDIWIDEEDMVLIQAHKEVGNKWAEIAKRLPGRTENSIKNHWNATKRRQFARRRSRTSFKGPKSGTLLQSYIKGLGIVGPSNKSAAAPLPEPTLSPSSPETLGAKSAKTDEIALEHSSSSNILDSQGILLPSMHEYNNCSESQSCEELLAPICDDFSVEMCDGLFGTNEDAFQVYAVDDDDINMNYIFNHIDHAAIKVDPEIDMEMMMMWDDDADNLGCTAEPAGPVAHVETVHVKEEMDLIEM…
Oropetium thomaeum|Oropetium_20150105_07872	30.5	Poaceae	TGCTCAGACCAAAAAGAAAAAATTTTGAACTCGTCGAAGGTTAGGCCACTCTTCCAGCTGCGCATGCCAAATCTGCAGATGTGGCAACACCCTGTGTTCTCAACTTCTCACGCTCTGTTACCGAGCTCATTTCCGCTGCAGTTGCCGTACAAGAATCACGTTGTGTGGTCACGACGTATCTGCTGCAGCTAGATACGTGATACTACTGGTAAATCTGATGAACAAAGTGTCTCCAGTTTGGTATTAAAAGGCACTTAATTACCTCTTGCACGGAAAGCCGGGAGTCGTCTTAGCATTAGGGATAGTAATGGTGCTCACATTAACTTTTGAAATAAATAATTTAAGCAATATAAGCTTCCTTAAGTTGCGGTCTTGAGGGGGTAGTACATCCTCCATCTC…	QNGLYELHPVDHHQFDGVGEYSYYTSSGSVLPSAAAFNDLGHQYQYYSEREETNRPGASSVDPNNVLTLATPKPEVCHRVVQSGFIGSYKAYENETTNRFAPRKKAAGSTSSKKTNVVTKGQWTPEEDRKLVELVEQFGLRKWSCIAQFLPGRVGKQCIERWHNHLRPDIKVQSLNLYLKCFQIDVKDIWSDEEDMVLIEAHREVGNRWAEIAKRLPGRTENSIKNHWNATKRRQFAARRRRSSSSSTSKRKQGPKSSGTSSTLLQKYIESLGTGPGNKNSAPSSSSRLLDQPSASAPLDLEPEQHNREPNNDSVLLLLEVEAQGVRLGIYEESNCAGDDDDFSVDMLCGSLLFDGALREDQDAAAAVDEADGVGGDSVLNHLNFGVDEDLINVDMALA…
Cleome violacea|Clevi.0021s0227	62.2	Capparaceae	CGGAGAAATTTGAGATTTATTTTGTCTCAATAAAACAGTGTAGGGAGTACCTTGTTCCTTGATTTTTGTCTGTATCCGGGTTGACTTACTGTGCAGGAATCGAAAACTGTATTGCGTGTTCTTCAGCCCTACCACAAAACCCTAGGAGAGCGCCGCACAATCTCAGTAGGTCATTGAACATTTTTTTAATGCTTCTCCTTTTCTTAGTGCGTCCATAATTCCTCCCACTTTTTCCAACTAATATTACAAAAAAAATTTAAAAAATATTCATTATTTTGTTTCTTATTCTTCTTAGGGTTGGTGTTTGGGCCGGGTTTGGCGTTGGCTTTATTTCATTTGGTTTTAAGGTTGATTTGTTCGGGTTAGAGAGAAATAAAACCAATTTAAACAAAAGGTTCG…	MENFDESDFPVSQTVFLPEEHTKPQEGVRDDEDFPFEIPSQTKPTNFLHDFHHLDQFQVDGSPSNPLFGMETPFNGPFEPYPYVCSSTDDVDFYESKPFADNLNGVGRGHFMNHYQTGETNPYFNSMPRQGNVFDHRVMGSEQNNVMMMIPFDHPEIIKPVNFVMPDEVSCVSAENYCYKATGLNKNRAFTRRKSWKGRKKSTVVKGQWTIEEDRILIQLVEQYGLRKWSHIAQMLPGRIGKQCRERWHNHLRPDIKKDTWNEDEDKVLIEAHKEIGNKWAEIAKRLPGRTENSIKNHWNATKRRQFSKRKCRSKYPRPSLLQDYIKSLNLDASSSSVPARGRRKDKNKKDTEAVAEGPGVCWHDRIMPECVFHNDFEFDEKLLEEGCSIDSLLDGIPQ…
Kalanchoe fedtschenkoi|Kaladp0048s0881	36.3	Crassulaceae	AAGCCACAAATATCCTTTTGCATGAGGGCCTCAGCCTTGAGACGGCTCTGGCTAAAAGTATAATGTTTGATTATAGAGTGTGATTCTGATTCTTTTGAATAGTGGCTTTATACTTAACCGTGCATATCTGTAATATATTAATGTTCTTTTTTTTTGTCTATTTGTTGCCTTTAGTATGCAGAGTTCCATGCTATCACTTTTTGAAATCAAAACTCACATCTTAGAAAAAGAAAAAGAAAGCGCTTGTTCCAGTTTTATTTTTTCCTTTTGATACAACATGTGCTCAAATCTTTTTATTTCATACAAAACTTGTCCAAACTTTAAACAAAACAATTATTATTTAAAACATGGTGAATAAGAAACTGACTGTGGGTTACAGTTTCAGATTACCTTTGGTAT…	MFVSDTLSKLPTADGFPFEAVLPLPDNNFLDDNHQPNHQNFNTWASVDKSFGLYQVSYLDPFDPYALESHQTGLSCEMLDRPANKFYYDYIEDIKPLNYVVPDEFSCVTTNVDFTRYSADSNTAQESMIRVTSSVSSARKGPCKGKQSNVIKGQWTHEEDRLLVQLVDRYGIRKWSIIAQLLPGRIGKQCRERWHNHLRPNIKKDAWTREEDKILIEAHEELGNKWAEIANRLPGRTENSIKNHWNATKRKEYAKRKRRIKNPKPSSLLQEYIKSLKLGNNSSLTGKQAGRRSRKSSTNRRTTETENVLPPSGQEQQVLVSVCDEFCPSDRLVPDYNDFGDVLPDFDFDGSLFEESNIESLLEDMDIVVDCARDDNEQVEEVAEKALVGMGYLAKCPVQ…
Kalanchoe laxiflora|Kalax.0003s0100	37.6	Crassulaceae	TCATATTTTTAATAAATATATACATTATATTTTTTAAAATTAATAAAAATAAGCCACAAATATCCTTTTGCATGAGGGCCTCAGCCTTGAGACGGCTCTGGCTAAAAGTATAATGTTTGATTATAGAGTGTGATTCTGATTCTTTTGAATAGTGGCTTTGTACTTAACCGTGCATATCTGCAATATATTAATGTTCTTTTTTTTTGTCTATTTGTTGCCTTTAGTATGCAGAGTTCCATGCTATCACTTTTTGAAATCAAAACTCACATCTTAGAAAAAGAAAAAGAAAGCGCTTGTTCCAGTTTTATTTTTTCCTTTTGATACAACATGTGCTCGAATCTTTTTATTTCATACAAAACTTGTCCAAACTTTAAACAAAACAATTATTATTTAAAACAT…	MDQFGAAKYEEAHPTHQMFVSDTLSKLPTADGFPFEAVLLLPDNNFLDDNHQPNHQNFNTWASVDKSFGLCQVSYLDPFDPYALESHQTGLSCEMLDRPANKFYYDYIEDIKPLNYVVPDEFSCVTTNVDFTRYSADSNTAQESMIRVTSSVSSARKGPCKGKQSNVIKGQWTHEEDMLLVQLVDRYGIRKWSIIAQLLPGRIGKQCRERWHNHLRANIKKDAWTREEDKILIEAHEELGNKWAEIANRLPGRTENSIKNHWNATKRKEYAKLKRRTKNPKPSSLLQEYIKSLKLGNNSSLTGKQAGRSRKSSTNRRTIKKENELPPSGQEQQVLVSVCDEFCPSDRLVPDYSDFGNVLPDFDFDGSLFEESNIESLLEDMDIVVDCARDDNEQ
Zea mays|Zm00001d034467	31.2	Poaceae	CGCAACGCAACGCACACATAACCGACTAGTAGAGGAGATAAAAACCTAGTTTTATAAACGAGGGAAATTCAGATTATAAAAAAAAATTGGCAAAAAACTTGGACATGGATCTACGCAGGGTTTGGGGGTCCGTAGTGTTTCGTGCGCCCAGCCCAACAGGGATACATTGCTCGGCCTTCGGCGTTCGGTCCGCTTCACACTGCCCACCCCTGTTGATGATCGAAGCGGAGAGCCCCTCCCTCCCGTCATGACTCCTGATGAGTCGTGGTCCAGTCCTCTCGGCCGCCGCCGCCGGCCGAGACCCCAGACGGTGGTAAGGCAACTTCGTTTTGCTGCCGCCGTACCATCAAGAGTGCGACACCGACATAGATCCTCTCCTACGTGCGCCTGAGGCTCGCC…	MQADDKLATQISLPPSCIASEIAMDFSCFQPHTGICSYLPFDSYMQHDGQYELHLHPADHHPLEVTGDYTSATFDDLGHEFFAEREIEKPIFNRTSSIGRRVGSQLPLPTIKTEVSHLIDSGLVSCKAYEINDRFLARKKTSLKKANVVKGQWTPEEDRKLVKLVEQFGLRKWSYIAQLLPARVGKQCRERWHNHLRPNIKKDIWSDEEDMVLIEAHKEVGNKWAEIAKRLPGRTENSIKNHWNATKRRQFARRRSRTSSKAPKPGTLLQSYIEGLGIVGPSDKSAAPLSEPTLSPEAPGAKSAKTGGTTLPEEHSPPSNMLDSQGVLLPSEELLAPICDELLDGMCGGLFDCTNEDAFFRVCAVDDDIDVSYIFDHAIKVDPEIDMEMMMMWDDDALA…
Populus nigra|Poman.15G063000	41.8	Salicaceae	AGTCTACGTCAAGGGCATGTACTGATTAGAGAATCACTACATTAAACTTGTATTAAGATTTTGTTTAGGAACGTGGTTTGTATTTTATTTTAAAAAAATTTAATATTTTTTTGTTAAAAATTAATTATTATTTTGTGTTTTGGATTGTTTTGATGTGATGATCTCAAAAAAAAATTAAAAAAATAAAAAAATATTATTTTTATATATTTCAACACGAAAAATATTTTAAAAAATAATCGTAACCATACCTTTTATAACCTCAAAGAATAAAAGAATTAATATCGATAAATAAAGAGACATAACTGTTACCATTTTCCACTGTTATTACATTTGAGTTTATTACATCCTTTTCGCCTCAGATATATAATATATCCCATCAAGCAAAGAGAATTAATTAAT…	MFLSNKPYMKEDYFPFETVPASPSSKGFLQDFDHLDDDHDSQFHANGSASNPFFGVQTGSNFDSFDAFPYGLPSDIDFYDYECKPFVGNINGGGGHGHGQVNEDLQSGAYLNMSSQRNPIDDIGSNQGHVSLNFEEIKPVSFVVPDEVSCVSAATSECKRKMGLNKTRALLPSARKAWKGPKKNSIVKGQWTTEEDRILIQLVEQNGVRKWCHVAQMLPGRIGKQCRERWHNHLRPNIKKDTWSVEEDKVLIQAHSELGNRWAEIAKMLPGRTENSIKNHWNATKRKQYSKRKCRPKYPKASLLQDYIKSLNLDSGITGRGLGITTASTDIILGNDTRMKAPELLPRDLVLFKDNDDGLVPNYSFNEVPDFDIREKIFRGGCSVDSILDELPCDDSVAH…
Pharus latifolius|Phala.01G188200	14.4	Poaceae	CAATCTAATGTTTAAACCACATAGAGTTTTGGGGAGTTATGAATTGGATGAGTGCCTAGAGAGAGATGAAGGAAGAATATTAGATGCATTTTACAATGATAATGCAAAATACTCCGCATTAATAATTTCTTTTTTCAGTTTGTTATTTTCTCTTGGAAGAGTCATTTTCTTATTCCTAAGGCAAATCCATGGCCCAAGTGGATGGATGTGCACGTCTGCATGCCATTGGTAACTATCCATTAGTCAAGTGAACATGCATGCTTCAATGCAAATATTTCCAAGTATGGTTGCATGTAAAGCATCTTCAGCATGGTCCTGTGAGACATTGTCATAATAATATGGCTTATATCTTACTCAATGGTCCCAGTAAACTTCTACACTCTTGTTTGAGATACATAT…	MQKDNWSEEEDMILIQAHREVGNKWAEITKRLPGRTENSIKNHWNATKRRQFARRRSRSSSKNPKSGTLLQNYIKSLGIGPSKITTTLSLQETAPKSPEMKHKRLECELSSTAPAQGMLNMQDQTNACQELLVPTCDDFSIDMCDVFFDTRQEAQHQGYHIDDDDDTDMNYIFNHIDYAIKVDHGIDMEMTWDDDDVIEAIELESTPLVMTSEMKTVHVEEEVDLVEIIKRSQNRRAPENNQ
Portulaca amilis|FUN_047388	38	Portulacaceae	TTATATATATAAAAATACTACCTCCATTTGATTTTGTGTCATTTTTGCAATTATATACAATCCTTATCATGATAATTTGTCAATATAGTTTTGTAAAATTATTAGATAATATTTGTATGAAAATGTTCACTACAAATCTAATGGGAATCGTTCTACATAATAAATAAATGTATTTTTGTCCGCATACTCAATCTATTCATGCTCTTTCGTGTAAGAAGGAAGAGTGGAAAACTGCCTACATTTTGATCATTTCAGACCTCACGTCAACGAAACTATACTAGGATTTATTGTAATTGTACACAAGGGTTGATTGAAATCAACTTTTTATTCTATAAATAACAGTCTGCAGATACTTTTCTATATAGAAATTTAGGGTACAAAAATTTAATAGATTTTCAT…	MDFDPKFRENNSSNSSLFFHDNFPKPRDDHFSIDGVSSSKDTSFLQDLQPFDNFNLNGPSSTSTPLFSMQPTCLDAFDNSSLEGLQNFDFYESKPLVSNHGGNNNNASLIPLMDDYNNHQANGVMMLGHSQMVTPINMINTNSSFQNHNLHFNYYDLGPTKYLPADEGSCTSLKNDMAMATKNLMVKKGARGRKKKTNVVKGQWTIEEDRLLVKLVERYGVRKWSQIAQMLNGRIGKQCRERWHNHLRPDIKKDVWSEEEDRILINAHAEIGNKWAEIAKRLPGRTENSIKNHWNATKRRQFARRKCRSKYPRQSSLLQEYIKSLSPEVINAGCRKKPTIPTPRTTTTSNAKSSSNLNNNTSTNTNNNNNNNAQSGSSESESSEEELNVDPPQDYDFSD…
Dioscorea alata|Dioal.4192s0001	21.9	Dioscoreaceae	ACTAAAATTTTTATCTTTATTTTGAAAGTAATGGTTGAAATATTTATTTAAAAAAGTAATATTGTTGACATGGCATTGGTTTTATATTTATTATTGCGACGTATATTAATTTACAAAAACAAAAAATAGTAATAAGAAATTTTTGTTTATTCAAAATCGCTTGTTGACTGTTGACTATTGAGATTGCAATAAATAAATTTTTAATAACATTTATAGACCATAATAAATATTATTTCAATACAATATTGAACCGTATAAGATAATTTGGTATTTTAAAAATATAAAATAACAAAAAAACCTATTTAATATTAAAAAAAACTCAAACTTTAATTTGATTGTCATGTCTCACTATATTATGCTTGGCATAAAATCCATAAGCATTAATAATCATAAAAGCCA…	MSIECSLMVDEVHHQPLMAMDELSCITGNKGSSSTETMAMNKSIPSRRMVSKIHNRNNLVRGQWTLEEDSEEEDKTLIQIHREVGNKWAEIAKKLPGRTENSIKNHWNATKRRLLSRRRLRSSRHRKSNSLLENYIKSLNLQITPTRRRKNTHDSDNSNPMKPTQSLKDEHEVQHEVWNYEDECFVPNCEFGDLSELLFDASSPALMSENYRCEEEENVGFLFDKLGFGGGEENEGLDMEVVEEMEGWDEMQRGFMDESEMKQEMDLVEMITSQTQ
Helianthus annuus|HanXRQChr17g0548321	27.5	Asteraceae	CCCGAGCTTCACTTATCGAGCTCGCGAGCCTAAAAAGTCTATTATTTATATTATTTTTATTTAATATACTACTTAATAGCTAATAAACGAGCCGAGCCCGAGCCGAGCTCGAGCTTGAGAAAATACAAACGAGCCGAGCTCAAGCTTTGAAAACGAAGCTCGAATCGAGCCGAGCTCGAGCCCGAGCTCTTATAAGTTAATCGAGCTCAAGCTCGAGCCTGGTCGAGCTCGGGCTCGGTTCGTTTGCACCCCTAGTTAGGACCTCTAATCTGAATTGGTCAGACATTTGCCTTTGAACGGTTAAGCGCTATACTGGCTCTTAATGGTTCAACCTCTTACTGGTTTAGCACTTAGTGATTCAGATCTCTTACTGGTTCAGCACTTAACTATTCAGAAGTT…	MSSNMHFFGNFSLNDYSSESITPTCAFMESPSHQLCSSFPNFEQFVSQEASPNSFLVGPTQSYDTYQISASRSDLLEPPMRQPEITQPVLVPENNKKTTGRKNKKNVESKGKVDKRQREKVSVRHRWSKYEDRLLVQLVEQHGEKNWAHIAEKLPLRIAKQCRDRWHNCLSPNIVKYGWSEEDDKLLISLHKQFGNKWADIARNMPGRCENSIKNHWNATKRNQFKISSNGYIKTKYHSYLLKDYITSISSSSSDNQINTQESSGFDPQNHEFATSLNALSSSFPGSWVGYEPDELVVDGIGFDFHEVSSHLVDQLQFDSQNVTGFIGSPFGVGFR
Urochloa fusca|Urofu.9G052400	28.7	Poaceae	ACTTGTTTTTTATCCAAAAAAAATACTTGGGGGTAAAATAAGCTCCCAACATCTGATAATTCACACGCGACGCAGCACGCACACGATTTACTTTTTTTTTTTTTTGAGACGGACGCACACGATTTTTACTGTCTCACTGTCTCTGAATGAATGAGCCGGAAAGTTCATGACCTGGGCCTGCGCAACTTTTTGCGGCCCCCGAAAGAAACCTGGGATTTTTTGGGCCAGCCCAATACGGGACTTCGTTGTTCCAACCTCCACGTCGAGCCGCGGGCCTAAGTAACGTTCCTTATGTAACCACACATGATCAGGCAAGCGCAATCCTAATCCTGTCACCTGCACGGCTGCACTGGTGACTCTGCCCCTCATCTCCAGGTTTGACTACCAAACCCTCAACCG…	MVPLATFNDLGHQYFAEREIKKPIFGHASSISHRVGSQLPVLTPKTEVSHLIESGLGSYKAYEMSDRFVTRKKTSHSLLKKANVVKGQWTPEEDRKLVKLVEQFGLRKWSYIAQMLPGRVGKQCRERWHNHLRPNIKKDIWNDEEDMVLIQAHKEVGNKWAEIAKRLPGRTENSIKNHWNATKRRQFARRRSRVSSKGPKSGTLLQNYIKGLGIGPSKNSVAPPAQPTLPPPSPAATPGSKLAKIGEMLQDSPSDTLDSQGMLNLHEYNCNEAQSCEELLAPICCDDFSVVDMCDGLFDTKQDAFQVYTVDDDIDMNYIFNHLDHAIKVDPEIDMEMMWDDDALGCVEPACVGSAEIETVHVKEEMDLIEMVAATEQYGEAEKK
Populus deltoides|Podel.12G085700	41.1	Salicaceae	TCCGGTACTGCGTGGAATTTTCCTTAAAGTTTTTAATACATGAATATTTTTCGGAGAAGAGAATTAACTTCTTGTTCAAGATAAAGTTATTAAACTCAACTTGATTCACGGACCAGGTTATGAAATGGTTGTTGACTCGAGTTCTTTCAAGTTAATTAAAATGATGTGTTGTATTTAAAAAAATCAAAACGATGTAGTTTTATTTTTATTTTAAAAAGTTGGAATCAAGTTTTTTTAAAAAAATAAAAATCAAACTAAATCATATCTAGATTAATTAGGTCATGAGTTGACCCTCTAAATTAAACGGTAAATTTCATTTTGATTTTTTTTTTTAATTCAATGTGGTATGAGTTTTATGACTATGTTGCAAGAGGCCTTACAAATCAGATTTTCATGTCA…	MELDSNVKKENPVSQPMFLSSKACIEEEYFPFETPCPSSKGFLQGFSHLDDHDNANGSSSNPLFGVQTGSNFDSFDAFPYGPSSNIDLYDYECKPFAGNINGGGGHGQVNDNFQSGGYSNLSSQRNSIDEIGSNQGYTSLSFEEAKPVSFVVQDEVSCVGTAENECKNKMGLNMTRTLQPFARKTWKGRKKNSVVKGQWTTEEDRLLIQLVEQYGVRKWSDVAKMLSGRIGKQCRERWHNHLRPDIKKDAWSVEEDKILIQAHSVLGNRWAEIAKRLPGRTENSIKNHWNATKRKQYSKRKCRPKYPRASLLQDYIKSLNLNSGTTSWKDHGITTADVIPDNTANMKAPEQQPRDLVLFKDNDGGLVPCYSFSEVPDFDNIQEKMFQGGCSVDSILDGL…
Chasmanthium laxum|Chala.03G247800	31.4	Poaceae	CCTCTGCCGCTCTACCTTTCTCTTCTCACCGCCGGCCGCCGCGCCACCCCGGTTCACTGCCGCGGCCGCTTTTAGCGCCTGACGCTCGCACCGGAGACCTCCTCCAGCTTGAGGGCGTCGGAGGTTCTGGTGGCAAGGCAGCTCCTTTTTGCCGCCGTGTCGGCGGCACCGCTAGCCCCTCTCCTCCGTGCGGCTGACGCTCGCTCAGCAACCTGAGTCCAGGTTCGTACTGAGTTGGAACGAAAACATGTTTTGGGGGTGTGATTCAACTGTCCAAGTAAGGTTGCTACTAGTACTACGAGCCTGACGACACTATAAGAACTTGATCGTCTGTGTGTCATTGTGTGTGATCAGCTTGGTGATTTTGGAGACTCGTTTACCTCTGGGGTTCGGGGGCCG…	MDFSCFQPHTGSCNYMPFDPCMQQNGHYELHPVDPFEAIGGYTSAGSMVPSATFNNLGHQYYSEREIKKPIFDHASPINHKVVSHLPLLTPKTEVYHLIESDLGSYKADEMNGRFVPTKKTSSNSLKKTNVVKGQWTPEEDRKLVKLVEQFGLRKWSYIAQMLPGRVGKQCRERWHNHLRPNIKKDIWSDEEDMVLIQAHKEVGNKWAEIAKRLPGRTENSIKNHWNATKRRQFARRRSRNSSKGPKSGTLLQNYIKSLGIGPSKNVAALARAQPTLSPSSPAPSRAMSARMNDESLEHQSNVLDTQGILGIHENYCVETQSCEELLAPICDEFSVEMCHGLFDTKEGAFEVYTADDDIDMNYIFNHIDHAIKVDHEIDMEMMWDDEALGFVEPAGSAQ…
Paspalum vaginatum|Pavag07G192700	31.2	Poaceae	AATTTGACATCACGCCACAATGACACGTGGGGTCACAATGGGTCAATGACATGTGGGTCTGGGTGTTAAATTCTGAAAGTCTTGCGTATTGAGACCCAATTTCTGAAATATTTCGTTTAAAATGCTTCTTAATATTGTATTAAGAGAGCGTGGAGAAGTAAATATATGCTACCCTGAATCTTATGTGTGGATTGTGGACTAAAAACTCCGCTTATTATTTGATGCCGAATCACGCCCAAAGTATCTTCACCATTTGTCAAGATTACTCTGCTGGGCTGCTACTGTTGTGTCCCCACCCCGACGTTCCCCACCGGCCATCCTCACCTCTTCGCTTCGCCACCCCCGTGTCTGTCTACACTGCCGGGCAGCTCGCCAAAGCCCCAACCCCCAAATCCTAAC…	MAPSATFNDLGHQFFAEREIKKPIFDHASSISHRVGSQLPLLTPKTEASRLIGSDLGLYKAYQMNNGRFVPRKTTSNTSLKKANVVKGQWTPEEDRKLVKLVEQFGLRKWSYIAQMLQGRVGKQCRERWHNHLRPNIKKDIWSDEEDKVLIQAHKEVGNKWAEIAKRLPGRTENSIKNHWNATKRRQFARRWNRTSSKGPKSGTLLQNYIKLESAQAKARHLFLNLDCRCLHLQLSEQTQQR
Amaranthus hypochondriacus|AH021035	37.4	Amaranthaceae	AAGCATGGTTTATAAATTATTTAATTTAAAATTTATAATCATGTATATATGTAATTAAGTTATTATATAACTCCTTAATTATATTGAAACTATAAATGTACAAAATTATTTTATTGAAAGTATATTTTTTACATAAATAACTAATATTTCATCCGATAATTATCCATTTTAATTAAAAGATACTAAATATCTTAGTTGATTGTATTTGGTAAAAAATTAGTAAATAAGGTATAATTTTAAAATCTTTTGAAACTAATTAATTAAACTTTTCCAATCCGAAAGGTATTATATGATATGCTACAAAAATTTTGCCTAATTAGAGCTCGGAAAGAGCAAGAAATTTTTTACTATAAAGTCAACACGTGTCCTAATTGTTTCTGCAACAGTATATTGTATAGA…	MDFNAKYKQKFSSSLPLFFNEKNSKSRDERVFLEGASCYDLQEFHHVENFNMNLNVSSSNTNLNPLFEIQQNDHLDSYENSPFGLFPNYDFYETKPFVNHVTNDGGLVPLLENFNQNGGVLGNSHMINQGSQSYNYPLNYCDYGFRASDEDTSVTPKSMVRKQRRSRKKTSVVKGQWTTEEDRLLNQLVERHGVRKWSQIAQLLNGRIGKQCRERWHNHLRPDIKKDVWSEEEDRILIKAHAEIGNKWAEIAKKLPGRTENSIKNHWNATKRRQFSKRKCRAKYPRKSSLLEEYIKSLTPETINAGCRKKPQSSIKNEANSSKQQIESSNSSSSDQIRLEYDFGEVPEFNFSAQMFEEGSLDSILDCYDDPQHGHKFNEVMNHSHDDLSSLRQFGEKRE…
Solanum tuberosum|PGSC0003DMG400018092	38.6	Solanaceae	TTTAATTAAAGTGAATAGGTTTTTTAACCATGAAATTGAAAATTAATAGCAAACAAAATGAATATTTCGTTAAGTCATGTCGCAATTTTAATTTTAAAAAAATAGATGGAAGAGAAGTGCATATGCATACTTAATTTTGATGTTGCTACTTAAATTATGTTCTGTTTATCGATTTCTTAATATGTGTTATTTTCAAATAACTTTAGATATATAGTATCGGAAGATAATCTTGAAAAGGCCAAATTTTAGATAAATCAACAATATTTTATATTGATCTAAAGTTAAATTATTTTTGCCTAAATTTCAACCATATTAGTTGAAGTTAGAAATGTTCCCTTAATTGATTAAAAAAAAGAATGAATATTTTTTTGGTTAGATCATTGGATATAAGGGAAAGAT…	MEFDHSNNQDVFCTPPKDFLQDFRHLDQNFMIDMNNIYDPLFDPLSNHDDNFSSIGQDFNFGYEFKPFEQNGSASGSTLVMKNFENSTDMNYNFICNQDMKPINFNVVPDESSCVTNTIDTNGTNYIYDDKEIDGRKNMKILSSSSSMRKIGRATRNKSKSVKGQWTIEEDRILIDLVERFGDRKWSQIAQVLKGRIGKQCRERWHNHLRPDIKKDLWTEEEDMILIKAHAEIGNKWAEIAKKLAGRTENSIKNHWNATKRRQFSRRKCRTKWPRPSSILQNYIKSLNFEKSNNNAGKSTEPIIEEVPANYDNFNDEFGLDNKLFDDLEIPYELMQDGEENHKELDLMDFDYSE
Theobroma cacao|Thecc.03G013800	47.3	Sterculiaceae	TGCTTTGATTTGAAACTATTTACACACTAAAAGCTTTAATTTTTTTAATTACTACTAAATTAAGAACAGCCACGAAAAAGATTTAAGATCAATGGACTGCTGGTCATGCGTTACCCTGACCAAACCAATGAGAATTAAAATTGGTTTTTATTGTGCCTTCATTATGTAAAACCAAAATTACCATTAATGATGCTGAATTTTAAGCCATATATATGTGATTAATCAAAGTGATTTAAAGAGTTTGTCTTAATGTTTTGGAGTTTTCAGTTACAAATTAATGCTCATTTATTATGTAAAATACCAAACCAAAAAACAAAACAAAACAATCTTGGATATTTTTTGAGGTTTAAATTAAATTAATTAGAGGTATATGTTTTAGCTAACTTTGGCCCAAAAAAA…	MELDAKLRENMTPPGQQPMFMKDELFPFETTPSSSSKGCYHWQDFHHLEHHHQVLDVNGSSPNPVFGIQTACYDPFDAFPYGCSANDVDFYECKPFADNVGAAGHGQVMDNFQGGGGYLNLSQRNSDDVVMGSDSIGYMPFDFQGVKPVNFVVPDEVSCVSTAENAYYKKVGMNKNRVLASTKRTWKGRKKSNVVKGQWTIEEDRLLIQLVEQYGVRKWSLIAQMLPGRIGKQCRERWHNHLRPDIKKDTWSEEEDKVLIQAHIEIGNKWAEIAKRLPGRTENSIKNHWNATKRRQFSKRKCRSKYPRGSILQEYIKSLNLESSSSTRYQEKPSTATNAAIADMNTSTKAPNHQPKALDFCPTDRLVPEYDFNEVPDFCFDEKLLQESCSIDSLLDEIP…
Carica papaya|evm.TU.supercontig_76.38	46.1	Caricaceae	AAACCCAGAAAACACTTTTTTTTTTTTTGTTTTTAATCATACCAGATCTTGTTACAGGTTGACCCATTTAAATCTATTACTTGATCAAATGAATATGTAACTAAACTAAACTTAAAAAGAAAAATGATAAATTGATTGTTATTAGAAATTATAATTATTTATTAAGTTCGTAAATTACTTAAATTAATAAAACAAATAATAAATTGTTCATTAATTAATTTTTAATTTTTTTTATTATTTTTACAAAATTTTATCATATTCGGTATGAATTGAAAGTTGGACATTTGAATGGAAGATCAAATTGAATATAATTAGACTTAATCCTGTTTGATTTGGTTTTTTCACTTGTAACTATTTAATTCTCTTCTAAACATTAATTTATTATTTTGGCTTATTTTA…	MEFETKVGDEEDHHHHHLLPTHQQPTFFSDHHSNYMKPYTKDEFLFEPPLSKGTFLQDFNLLDDNHHFHGHHGPSSNLIFGVQTPCYDPFDAYTSYGCSTNFDFYESKPLISEINNGHGHVMDNFQSGEYMNLHHHHHHHHHLQLGNVVDHMNQSSNVGFDYPLVKPMNFIVPDEVSCVSAEDDYYKKADMQKNRVFPWKKTWKTRKRNTIVKGQWTIEEDRLLVQLVEKYGVRKWSHIAQMLPGRIGKQCRERWHNHLRPDIKKDIWSEEEDKVLIEAHMEIGNKWAEIAKRLPGRTENAIKNHWNATKRRQFSKRKCRSKYPRGTLLQDYIKTLNLGPPPTARSTTNSKPQTTSSHPPLLQTPWTFCPDDHDEVQDHRLVQDYDFHDFGFDDKLLQD…
Fragaria x ananassa|maker-Fvb5-1-augustus-gene-38.49	44.1	Rosaceae	CGGAATTGAAATTTTGTGCGCTTCATGGACTTCGTTGTACATCTCTTTTTCAAGCATTTGCCTCTGGCCTTTTGGCCCTGACATTGCTGTGCTTGACTGCTTGTTCTTGAAGGGCTGCAAGCTCTCATATTCAGGTCAAAACTCCATTACTGTTCTCTTTTATACTTCTTTATAAGTGATAATACTCCTGATTTTATTTGTTGAATTTACTCAATAACAGTTTCCACTACAAAGTAGTATAATGCTTAACGTTAGGTAAACACTCGCTCTTAATGGTGATGTTTAAGTCTATGTAACTTGACATGCATTTATTGTGTCTCATAATTTACGACTAGCTTTTACCATAAATTGCATTCTTACTAACGATTCGATAAATTAACTTCATTAATAACGAGTCAA…	MELNKLRDNLASQIPLLVPENNNSYMMKPYNMKEEFIPFEPSSSSKGYLQDFHHLDNQFHQYASGSSSNPMLGIQNPCFEPYYNENNNACYTYDQGSPADVNFYECKPLIISENLGHGQVLDNFQSGSSGGGYLNFPNPRSNPIGHMMGISRRSGTNFLPLTNSQDIKPVSFVVPDEDSCVNSENGYYKRVGMNHKGTSRLSTISRAGSTFKGRKKNNVVKGQWTIDEDRVLIQLVEQYGVRKWSHIAQMLPGRIGKQCRERWHNHLRPDIKKDIWSEEEDKILIQAHAEIGNKWAEIAKRLPGRTENSIKNHWNATKRRQYSKRKCRSRYPRGSLLQDYIKSLNLDAAPNTGRQRKSNNNNSNSSPADHSNATTDSTKVQSQTNVGFNSENDRLVPNY…
Aquilegia coerulea|Aqcoe3G124700	30.7	Ranunculaceae	CGTTACATAGTCAAAATTGGATTTATGATCTTTCTGATAGTTCAGAGTGAAATTTTTCCTGAAGCTCGTGTATCCTGAAAATCCAATCTACATAGGGTATCATCTAAATCACTTTACTCTGTTCCATAATGAGATTATTAATGAAAGATTCATGCTGCTTTTAGAAACACATCTGCATCAATGTGATTTAGGCTGGTTGGCGTGCACCTCGCGAGAAGGTATCACTTCAGGACTAGAAGGTTTGAAAGTAGTCTGTAGCCAAATGGAGTTAAATCTAAAGTTCAGGTTGAAGTGAAACCACCTCCATTAAACATAAACATAACCATAACCATGATGTTGTACTCAAATCATGATCCCATGCATCCAACTTGAAAGTGGTGAATAAACTAGGTCAAAACG…	MEFDTNYKEDVISDSTSLWENHMEPDLLGNEFSIDECSPNGYFQDFRQFDHISIVGSSSNLEFDVPSPRFERLEAALGNKSATNFEIYESKPLVEGGDDCSMDFIGDESKPIGKEGDICSNGIEKSMSKPLEGEGDECTMNFDVYESEPAIEGGKCNMNFNTYDSNTLAQDDNCSVFDIYESKPFTKDENRVMQNFWSSEFLNHPQGSLVPMVEQHQSELSSNFQEIEPLNYALPDENSCITGDQTSYQEVEFDRNDALVRRRTGKGHRIPRGQWTLEEDRLLARLVDKYGLRSWSHIAQMLKGRIGKQCRERWHNHLRPNIKKETWTEEEDIVLIQTHAELGNKWAEIAKRLPGRTENSIKNHWNATKRKQYTKRRSRTKGSKSTLLQNYIKSLSSNS…

## Sheet: Table S6
Table S6: SaeM-like element harboring genes among pollen-specific gene pool (Source: Honys and Twell., 2003)
All genes	SaeM-element harboring genes (promoters)	E-value (to B column)
AT5G14380	AT3G52600	0.42
AT1G02790	AT2G39570	0.42
AT3G07820	AT4G25780	5.5
AT5G26696	AT4G25590	5.5
AT2G47050	AT2G07180	5.5
AT1G49490	AT2G33100	5.5
AT5G59370	AT2G16730	5.5
AT4G26260	AT1G61860	5.5
AT2G46860	AT4G12430	5.5
AT1G54070	AT4G24630	5.5
AT1G55560	AT5G58720	5.5
AT2G45800	AT2G28320	5.5
AT2G47040	AT4G00110	5.5
AT2G46210	AT4G20070	5.5
AT3G07850	AT4G02900	5.5
AT4G36490	AT2G24240	5.5
AT1G55570	AT4G22850	5.5
AT4G25780	AT4G04320	5.5
AT4G39110	AT4G39860	5.5
AT4G35010	AT4G11720	5.5
AT2G02720
AT2G13350
AT2G02140
AT1G14420
AT2G33420
AT2G05850
AT5G23270
AT3G30775
AT4G02250
AT3G52000
AT1G04470
AT1G04540
AT2G19770
AT4G25590
AT2G23900
AT2G31500
AT2G21540
AT3G51300
AT2G46500
AT2G43230
AT2G26850
AT2G18180
AT2G03980
AT4G18700
AT2G07180
AT4G39670
AT2G33100
AT4G03290
AT1G30710
AT4G37280
AT2G18470
AT4G29340
AT1G03050
AT2G20320
AT1G01460
AT3G47440
AT2G16730
AT1G61860
AT4G25150
AT4G27350
AT3G52600
AT4G07960
AT1G15350
AT4G30850
AT2G36660
AT4G27880
AT2G35210
AT1G24620
AT2G40990
AT4G18640
AT2G02970
AT4G12430
AT2G29050
AT2G24370
AT2G07040
AT4G22590
AT1G11770
AT2G41860
AT1G04700
AT1G49270
AT2G28180
AT1G60240
AT4G39180
AT2G13570
AT4G25900
AT2G40620
AT2G40620
AT2G33270
AT4G33970
AT2G17890
AT1G10740
AT2G03410
AT3G46520
AT1G12070
AT4G38190
AT4G24630
AT1G22730
AT4G15980
AT2G39570
AT1G54280
AT1G61290
AT2G19050
AT2G02960
AT4G34440
AT4G31290
AT4G10010
AT3G16380
AT1G03920
AT1G49240
AT5G58720
AT4G33440
AT4G33230
AT2G37980
AT4G38230
AT2G47490
AT4G16745
AT5G51460
AT2G31830
AT4G13240
AT2G13620
AT1G51260
AT1G43630
AT4G27110
AT4G33390
AT2G17370
AT2G41970
AT2G19010
AT2G17530
AT4G17690
AT2G25600
AT5G49890
AT4G18790
AT2G41210
AT3G51770
AT1G03457
AT4G30860
AT2G26800
AT1G24110
AT1G78940
AT1G09080
AT2G42780
AT4G31420
AT4G20160
AT1G09180
AT2G13675
AT5G26150
AT5G26150
AT1G32170
AT1G15380
AT2G01670
AT2G24100
AT1G23540
AT4G01470
AT4G28000
AT1G08600
AT1G08600
AT1G70430
AT2G36900
AT2G33870
AT1G65430
AT2G28640
AT4G25230
AT1G05020
AT2G28320
AT4G27840
AT4G11050
AT1G70170
AT4G35500
AT1G54320
AT2G03470
AT4G26930
AT2G20440
AT1G04160
AT1G04600
AT1G49340
AT5G25880
AT2G43040
AT4G35940
AT4G00110
AT4G21326
AT1G08190
AT4G10360
AT2G43900
AT2G35630
AT4G23490
AT4G24580
AT1G11990
AT2G23660
AT2G45610
AT2G20840
AT1G54740
AT2G21860
AT2G03060
AT2G34440
AT2G20670
AT1G24350
AT1G05630
AT2G37010
AT4G31220
AT2G38410
AT2G44450
AT3G26690
AT1G59820
AT4G14780
AT1G79450
AT1G24330
AT1G70420
AT2G28590
AT2G03270
AT1G10080
AT2G33320
AT1G60610
AT3G23610
AT4G22780
AT4G20070
AT2G30360
AT4G27370
AT2G33670
AT4G09830
AT2G19400
AT2G17440
AT1G61140
AT2G22560
AT4G26100
AT2G29410
AT2G20830
AT1G30810
AT4G03260
AT1G05360
AT4G02900
AT3G58160
AT1G77250
AT5G18830
AT2G25630
AT2G22690
AT1G06750
AT2G41980
AT5G35390
AT2G41740
AT2G40180
AT5G42940
AT4G08590
AT5G26940
AT2G39650
AT2G30690
AT2G45490
AT5G66850
AT4G35380
AT1G12370
AT1G10170
AT2G44660
AT4G36210
AT1G79250
AT2G01330
AT4G31080
AT1G62660
AT1G10410
AT1G10410
AT1G10410
AT2G22740
AT5G65890
AT1G13950
AT4G02730
AT4G17650
AT1G15490
AT2G47330
AT4G02880
AT4G31430
AT2G42380
AT1G10070
AT5G13820
AT2G21430
AT3G51990
AT1G45050
AT4G26470
AT3G28210
AT2G38910
AT3G54850
AT2G22720
AT1G22650
AT1G03550
AT2G29790
AT4G36630
AT1G03930
AT2G29890
AT1G59890
AT5G42970
AT2G28540
AT3G02040
AT4G30060
AT3G55400
AT2G42520
AT1G54460
AT1G77300
AT4G16480
AT2G41440
AT4G22360
AT1G14020
AT1G05120
AT1G05120
AT4G38470
AT4G01660
AT1G78920
AT2G24240
AT2G03480
AT2G42030
AT3G54930
AT1G08730
AT1G03250
AT2G44525
AT4G22850
AT2G29040
AT5G64070
AT3G10660
AT2G03820
AT4G30940
AT2G32970
AT4G31750
AT4G38940
AT4G04320
AT2G30290
AT2G41050
AT4G39860
AT4G32600
AT1G26830
AT4G13980
AT4G35650
AT2G14490
AT2G17290
AT2G13940
AT5G03470
AT1G04500
AT2G02230
AT4G28990
AT1G10720
AT1G30620
AT3G48010
AT1G61700
AT4G12960
AT2G20470
AT1G79350
AT1G79520
AT2G30320
AT2G42010
AT2G39820
AT4G22910
AT4G33630
AT2G18680
AT4G28020
AT1G16330
AT1G24400
AT4G13190
AT4G18990
AT4G11720
AT3G46930
AT1G19090
AT1G23800
AT2G35650
AT1G14200
AT4G26270
AT2G22290
AT2G36310
AT1G71380
AT1G31070
AT2G27350
AT4G00550
AT2G25790
AT2G32670
AT1G16310
AT1G62200
AT4G14310
AT2G44750
AT4G35560
AT4G26330
AT4G10440
AT1G04610
AT2G37840
AT1G03750
AT2G33700
AT5G06910
AT2G18260
AT4G02660
AT2G16460
AT3G22460
AT4G21720
AT2G25940
AT4G19440

## Sheet: Table S7
Table S7: Potential TFs predicted to bind to pMYB98 functionally active 191 bp region.
Motif	Family	Matched sequence	Region (bp from ATG)
AT1G73360	HD-ZIP	TCATTTATTGT	-605 to -595
AT4G00730	HD-ZIP	TCATTTATTGT
AT3G61150	HD-ZIP	ACAATAAATGA
AT5G52170	HD-ZIP	ACAATAAATGA
AT1G69120	MIKC_MADS	ACAAAAATGTAA
AT5G01900	WRKY	TAGTCAAC	-671 to -643
AT2G47260	WRKY	AGTCAACA
AT5G41570	WRKY	TTGTTGACTAAATT
AT4G22070	WRKY	AGTATTAATTTAGTCAACA
AT1G62300	WRKY	TGTTGACTAAATTAATACT
AT4G04450	WRKY	ATTACATTTTTGTTGACTAAA
AT4G01720	WRKY	CATTTTTGTTGACTAAATT
AT4G24110	WRKY	TTAGTCAACAA

## Sheet: Table S8
Table S8. Primers used in the study
5'-deletion series related primers:
pMYB98_1634bp-F	ccCCTCAGCACGCGTGTAACGGTAACGACGGAGGT
pMYB98_1034bp-F	cCCTCAGCACGCGTTGCATTGAGGTGGGGACAAG
pMYB98_834bp-F	cCCTCAGCACGCGTTTTGTTATAAACGATGCGGT
pMYB98_702bp-F	cCCTCAGCACGCGTCACTCATTGTCCTTGGCA
pMYB98_512bp-F	cCCTCAGCACGCGTCACCTAATGTGTAACGTCA
pMYB98_350-F	cCCTCAGCACGCGTCATTGTAAACTAACTTCGA
pMYB98_194-F	cCCTCAGCACGCGT CAACAAACTACAAACGTTAG
pMYB98_Promoter-F	actctagaGGATCCTGTTTTGGAAAGGAG
pPpMyb98_1000_infu.fwd	CCGGGGATCCTCTAGGTTTTCTGCTGAAGAAATGCCTTAT
pPpMYB98_834_infu.fwd	atgattacGAATTCGAGCTCacacattgtttctgttggcg
pPpMYB98_698_infu.fwd	atgattacGAATTCGAGCTCtaaactcattcatgtctct
pPpMYB98_511_infu.fwd	atgattacGAATTCGAGCTCcttacaaccaagttttaccag
pPpMYB98_342_infu.fwd	atgattacGAATTCGAGCTCcaatacttaagaacttcattca
pPpMYB98_186_infu.fwd	atgattacGAATTCGAGCTCtacaataaatgcttttcctcc
pPpMYB98_infu.rev	GCTCTGGCATGTCGAGTAGTTGTCAGGGACAAGTAGTGG
pBoMYB98_1000_infu.fwd	CCGGGGATCCTCTAGCTTTTACATAAATTTCTGCTACTTG
pBoMYB98_821_infu.fwd	atgattacGAATTCGAGCTCatctcttacataagacgaca
pBoMYB98_686_infu.fwd	atgattacGAATTCGAGCTCtaatctttagcattgaaattg
pBoMYB98_498_infu.fwd	atgattacGAATTCGAGCTCcagtggtaacgtcaacataag
pBoMYB98_325_infu.fwd	atgattacGAATTCGAGCTCgcaatctatgtctaaacattg
pBoMYB98_infu.rev	GCTCTGGCATGTCGAATTTTTCGGAAAGAGGAGAAAAAAC
Fragment deletion/addition related primers:
pCaMV.fwd	ACGAATTCGAGCTCGGTACCAGCAGCTTGAGCTTGGAT
pCaMVpt1B.rev	GTTTGTGAAAACGCTAGCCTTTCCTTTATCGCAATGATGG
pCaMVpt1A.rev	CAACAAAAATGTAATTACCATTCCTTTCCTTTATCGCAATGATGG
pCaMVpt2.fwd	ATTCAACAACACCCATCGTTGAAGATGCCTCTG
pCaMV.rev	GCTCTGGCATGTCGACTCTAGAGTCAAGAGTCCCCCGTGT
pCV-A.fwd	GGAAAGGAATGGTAATTACATTTTTGTTGACTAAATTAATACTAC
pCV-B.fwd	AAGGCTAGCGTTTTCACAAACATTCAACTATGTTTACCCCAAAT
AB-pCV.rev	TCAACGATGGGTGTTGTTGAATTTGGGGTAAACATAGTTGAATG
pMYB98_1.5k.fwd	ACGAATTCGAGCTCGGTACCTCATGTGACAGTTGGGTTTTG
pMYB98_BYRGdel.rev	CGTTACACATTAGTTAAATGCCGAAGGACAATGAGTGT
pMYB98_BYRGdel.fwd	TCGGCATTTAACTAATGTGTAACGTCAACAAAGATT
pMYB98_Delcon.rev	GACGTTACACATTAGTATGAATTAAATCTAGTTTTTAATGTGTAAATG
pMYB98_Delcon.fwd	AACTAGATTTAATTCATACTAATGTGTAACGTCAACAAAGATT
pMYB98_1.5k.rev	GGCTCTGGCATGTCGACTCTAGATGTTTTGGAAAGGAGAAAAAAAAAACT
Y1H bait construct related primers:
pMYB98-pHISi_fw (P1)	ATTCCCGGGGAGCTCAAATGGTAATTACAT
pMYB98-pHISi40bp_rev (P2)	CGAACGCGTGAGCTCTGTAGTATTAATTTAG
pMYB98-pHISi60bp_rev (P3)	CGAACGCGTGAGCTCTTAGTTAATTTATCA
pMYB98-pHISi139bp_rev (P4)	CGAACGCGTGAGCTCATGTTTGTGAAAACGCTAG
RT-PCR related primers:
ANL2_RT.fwd	AACCAACCGGTTTAGCTACTGA
ANL2_RT.rev	GGCCTGTACAGCTGGTGGATT
Act2_RT.fwd	TCAGATGCCCAGAAGTCTTGTT
Act2_RT.rev	GAGATCCACATCTGCTGGAATG
ANL2-reporter construct related primers:
pANL2_1.5k.fwd	acGAATTCGAGCTCGGTACCCATGTCGTTTACTTTAAAAATTGTAG
pANL2_1.5k.rev	GCATGTCGACTCTAGACAAATAAATACAAGAGAAGAAACTAAC
